# Supplementary material for: Structural and functional microbial diversity of sandy soil under cropland and grassland
Source: PeerJ. 2020 Sep 2;8:e9501. doi: 10.7717/peerj.9501 (PMC7474522; doi:10.7717/peerj.9501)
Supplement: Supplemental Information 5 [file peerj-08-9501-s005.xlsx]

## Sheet: Arkusz1
			Measuring points/replications	BR – basal respiration	MBC – microbial biomass	DA – dehydrogenase activity	BA – β-glucosidase activity	pH	BD – bulk density	WHC – water holding capacity	SOC – total organic carbon
		cropland	P1	3.41635	0.208066	9.39564	201.595	5.783	1.2201	0.1575	0.78
		cropland	P1	3.10578	0.269587	10.5748	224.187	5.783	1.2218	0.1609	0.78
		cropland	P1	4.82948	0.296546	10.1032	226.037	5.783	1.22095	0.1592	0.78
		cropland	P2	3.40583	0.268896	11.2313	110.852	4.879	1.2601	0.1767	1.05
		cropland	P2	2.87464	0.269587	10.8019	114.611	4.879	1.2866	0.1741	1.05
		cropland	P2	4.06199	0.329035	11.3616	124.836	4.879	1.27335	0.1754	1.05
		cropland	P3	3.6338	0.553691	19.4842	260.58	5.812	1.2162	0.2043	1.35
		cropland	P3	5.13195	0.496317	18.8478	264.863	5.812	1.2512	0.2149	1.35
		cropland	P3	4.19162	0.515672	19.3821	250.317	5.812	1.2337	0.2096	1.35
		grassland soil	P1	2.44572	0.437561	24.8448	231.166	5.024	1.4637	0.2244	1.6
		grassland soil	P1	4.66911	0.522585	25.205	226.62	5.024	1.2684	0.2193	1.6
		grassland soil	P1	4.0815	0.635259	26.1054	217.621	5.024	1.36605	0.22185	1.6
		grassland soil	P2	7.80622	0.903464	29.2053	214.569	4.933	1.316	0.2158	1.54
		grassland soil	P2	7.71179	0.979501	31.5257	212.081	4.933	1.1703	0.2599	1.54
		grassland soil	P2	7.74327	0.963602	31.0384	201.553	4.933	1.24315	0.23785	1.54
		grassland soil	P3	10.268	1.97075	88.4086	682.776	5.716	1.222	0.3524	2.13
		grassland soil	P3	10.4812	1.94518	93.9358	681.047	5.716	1.2643	0.3557	2.13
		grassland soil	P3	10.57	1.73504	95.7721	674.924	5.716	1.24315	0.35405	2.13

## Sheet: t-RFLP
	CROPLAND	tRFs	54	55	59	74	76	79	99	104	149	162	249	250	400	480
		5mG1	0	0	0	0	0	0	0	0	0	0	0	0	0	0
		5mG2	0	0	6.69034	30.1705	20.8807	17.3327	7.75568	0	0	9.92576	0	0	7.24432	0
		5mG3	0	0	0	0	63.2112	0	2.19472	14.6138	2.82409	11.4595	0	3.24367	0	2.45293
		5mG4	0	0	0	33.4776	21.7311	0	0	7.05189	4.206	33.5334	0	0	0	0
		125mG1	0	0	8.42943	30.1489	0	8.22384	11.9657	0	0	23.5508	0	0	11.9246	5.75669
		125mG2	0	0	0	32.0442	45.558	0	0	3.06893	2.93351	12.8495	0	3.54588	0	0
		125mG3	0	0	0	45.409	43.5469	0	0	4.75926	0	6.28481	0	0	0	0
		125mG4	0	0	0	45.9535	43.2871	0	0	3.65455	3.33676	3.76804	0	0	0	0
		195mG1	0	0	2.95485	17.8408	23.8991	5.14413	0	14.5643	0	35.5968	0	0	0	0
		195mG2	0	0	0	60.3643	0	0	0	8.05621	5.82641	25.7531	0	0	0	0
		195mG3	3.02274	2.94066	0	20.9179	0	5.41518	3.69491	13.5902	4.99527	37.4475	4.11473	3.861	0	0
		195mG4	0	0	2.00846	87.9129	0	0	0	3.54777	0	6.53089	0	0	0	0
	GRASSLAND	tRFs	54	55	59	74	76	79	99	104	149	162	249	250	400	480
		5mG1	0	0	0	0	0	0	0	0	0	0	0	0	0	0
		5mG2	0	0	0	0	0	0	0	0	0	0	0	0	0	0
		5mG3	0	0	0	24.3997	0	0	0	13.4486	1.46172	60.69	0	0	0	0
		5mG4	0	1.97634	0	31.1452	37.0265	0	0	8.35442	0	21.4976	0	0	0	0
		125mG1	0	0	0	0	0	0	0	0	0	0	0	0	0	0
		125mG2	0	0	0	0	0	0	0	0	0	0	0	0	0	0
		125mG3	0	0	0.833719	45.1381	24.7684	0	0	6.94774	0	22.3121	0	0	0	0
		125mG4	4.01864	4.27245	2.34773	0	50.4001	3.07167	0	10.5239	5.97929	13.6286	5.75764	0	0	0
		195mG1	0	0	0	0	0	0	0	0	0	0	0	0	0	0
		195mG2	2.32062	2.88086	0	66.0579	0	1.45724	1.97288	5.98529	3.79893	11.8482	0	3.67807	0	0
		195mG3	0	0	1.30996	78.8563	0	0	1.50995	4.11933	1.65794	10.4673	0	2.07928	0	0
		195mG4	0	0	5.54974	0	28.2112	0	0	6.73593	8.10234	16.904	9.1723	12.8412	12.4833	0

## Sheet: Cropland_Fungild
New.ReferenceOTU186	0.0	1	Fungi	Basidiomycota	-	-	-	-	-	Unassigned	-
New.CleanUp.ReferenceOTU9318	0.0	1	Fungi	Basidiomycota	-	-	-	-	-	Unassigned	-
New.CleanUp.ReferenceOTU4159	0.0	1	Fungi	Basidiomycota	-	-	-	-	-	Unassigned	-
New.CleanUp.ReferenceOTU5697	7.0	1	Fungi	Ascomycota	-	-	-	-	-	Unassigned	-
New.CleanUp.ReferenceOTU7103	0.0	1	Fungi	Ascomycota	-	-	-	-	-	Unassigned	-
New.CleanUp.ReferenceOTU14747	0.0	1	Fungi	Ascomycota	-	-	-	-	-	Unassigned	-
New.CleanUp.ReferenceOTU11532	3.0	1	Fungi	Ascomycota	-	-	-	-	-	Unassigned	-
New.CleanUp.ReferenceOTU10685	16.0	1	Fungi	Ascomycota	-	-	-	-	-	Unassigned	-
New.CleanUp.ReferenceOTU16160	1.0	1	Fungi	Ascomycota	-	-	-	-	-	Unassigned	-
New.CleanUp.ReferenceOTU7472	0.0	1	Fungi	Ascomycota	-	-	-	-	-	Unassigned	-
New.ReferenceOTU95	2.0	1	Fungi	Basidiomycota	-	-	-	-	-	Unassigned	-
New.CleanUp.ReferenceOTU15192	0.0	1	Fungi	Basidiomycota	-	-	-	-	-	Unassigned	-
New.CleanUp.ReferenceOTU14508	1.0	1	Fungi	Basidiomycota	-	-	-	-	-	Unassigned	-
New.CleanUp.ReferenceOTU15700	0.0	1	Fungi	Ascomycota	-	-	-	-	-	Unassigned	-
New.CleanUp.ReferenceOTU5107	1.0	1	Fungi	Ascomycota	-	-	-	-	-	Unassigned	-
New.CleanUp.ReferenceOTU4549	1.0	1	Fungi	Basidiomycota	-	-	-	-	-	Unassigned	-
New.CleanUp.ReferenceOTU10814	0.0	1	Fungi	Basidiomycota	-	-	-	-	-	Unassigned	-
New.ReferenceOTU138	0.0	1	Fungi	Ascomycota	-	-	-	-	-	Unassigned	-
New.CleanUp.ReferenceOTU12842	0.0	1	Fungi	Ascomycota	-	-	-	-	-	Unassigned	-
New.CleanUp.ReferenceOTU13838	10.0	1	Fungi	Ascomycota	-	-	-	-	-	Unassigned	-
New.CleanUp.ReferenceOTU17389	0.0	1	Fungi	Ascomycota	-	-	-	-	-	Unassigned	-
New.ReferenceOTU181	145.0	1	Fungi	Basidiomycota	-	-	-	-	-	Unassigned	-
New.CleanUp.ReferenceOTU16184	0.0	1	Fungi	Basidiomycota	-	-	-	-	-	Unassigned	-
New.CleanUp.ReferenceOTU2844	0.0	1	Fungi	Chytridiomycota	-	-	-	-	-	Unassigned	-
New.ReferenceOTU25	1.0	1	Fungi	unidentified	-	-	-	-	-	Unassigned	-
New.CleanUp.ReferenceOTU3758	0.0	1	Fungi	unidentified	-	-	-	-	-	Unassigned	-
New.ReferenceOTU185	0.0	1	Fungi	unidentified	-	-	-	-	-	Unassigned	-
New.CleanUp.ReferenceOTU15903	4.0	1	Fungi	unidentified	-	-	-	-	-	Unassigned	-
New.ReferenceOTU161	4.0	1	Fungi	unidentified	-	-	-	-	-	Unassigned	-
New.CleanUp.ReferenceOTU14033	28.0	1	Fungi	unidentified	-	-	-	-	-	Unassigned	-
New.CleanUp.ReferenceOTU13782	2.0	1	Fungi	unidentified	-	-	-	-	-	Unassigned	-
New.CleanUp.ReferenceOTU12271	4.0	1	Fungi	unidentified	-	-	-	-	-	Unassigned	-
New.ReferenceOTU199	4.0	1	Fungi	unidentified	-	-	-	-	-	Unassigned	-
New.CleanUp.ReferenceOTU10382	7.0	1	Fungi	unidentified	-	-	-	-	-	Unassigned	-
New.CleanUp.ReferenceOTU11321	1.0	1	Fungi	unidentified	-	-	-	-	-	Unassigned	-
New.CleanUp.ReferenceOTU6298	0.0	1	Fungi	unidentified	-	-	-	-	-	Unassigned	-
New.CleanUp.ReferenceOTU16343	1.0	1	Fungi	unidentified	-	-	-	-	-	Unassigned	-
New.CleanUp.ReferenceOTU8920	20.0	1	Fungi	unidentified	-	-	-	-	-	Unassigned	-
New.CleanUp.ReferenceOTU1632	0.0	1	Fungi	unidentified	-	-	-	-	-	Unassigned	-
New.CleanUp.ReferenceOTU2304	0.0	1	Fungi	unidentified	-	-	-	-	-	Unassigned	-
New.CleanUp.ReferenceOTU10351	0.0	1	Fungi	unidentified	-	-	-	-	-	Unassigned	-
New.CleanUp.ReferenceOTU15251	0.0	1	Fungi	unidentified	-	-	-	-	-	Unassigned	-
New.CleanUp.ReferenceOTU577	4.0	1	Fungi	unidentified	-	-	-	-	-	Unassigned	-
New.CleanUp.ReferenceOTU14882	0.0	1	Fungi	unidentified	-	-	-	-	-	Unassigned	-
New.CleanUp.ReferenceOTU8915	0.0	1	Fungi	unidentified	-	-	-	-	-	Unassigned	-
New.CleanUp.ReferenceOTU13013	0.0	1	Fungi	unidentified	-	-	-	-	-	Unassigned	-
New.CleanUp.ReferenceOTU17893	0.0	1	Fungi	unidentified	-	-	-	-	-	Unassigned	-
New.CleanUp.ReferenceOTU3842	6.0	1	Fungi	unidentified	-	-	-	-	-	Unassigned	-
New.CleanUp.ReferenceOTU17656	0.0	1	Fungi	unidentified	-	-	-	-	-	Unassigned	-
New.CleanUp.ReferenceOTU3868	6.0	1	Fungi	unidentified	-	-	-	-	-	Unassigned	-
New.CleanUp.ReferenceOTU17762	0.0	1	Fungi	unidentified	-	-	-	-	-	Unassigned	-
New.CleanUp.ReferenceOTU15381	0.0	1	Fungi	unidentified	-	-	-	-	-	Unassigned	-
New.CleanUp.ReferenceOTU8073	0.0	1	Fungi	unidentified	-	-	-	-	-	Unassigned	-
New.CleanUp.ReferenceOTU15791	8.0	1	Fungi	unidentified	-	-	-	-	-	Unassigned	-
New.CleanUp.ReferenceOTU17067	0.0	1	Fungi	unidentified	-	-	-	-	-	Unassigned	-
New.CleanUp.ReferenceOTU1712	12.0	1	Fungi	unidentified	-	-	-	-	-	Unassigned	-
New.CleanUp.ReferenceOTU4858	2.0	1	Fungi	unidentified	-	-	-	-	-	Unassigned	-
New.CleanUp.ReferenceOTU9289	0.0	1	Fungi	unidentified	-	-	-	-	-	Unassigned	-
New.CleanUp.ReferenceOTU2251	9.0	1	Fungi	unidentified	-	-	-	-	-	Unassigned	-
New.CleanUp.ReferenceOTU14531	0.0	1	Fungi	unidentified	-	-	-	-	-	Unassigned	-
New.CleanUp.ReferenceOTU5323	11.0	1	Fungi	unidentified	-	-	-	-	-	Unassigned	-
New.CleanUp.ReferenceOTU879	2.0	1	Fungi	unidentified	-	-	-	-	-	Unassigned	-
New.CleanUp.ReferenceOTU2934	5.0	1	Fungi	unidentified	-	-	-	-	-	Unassigned	-
New.CleanUp.ReferenceOTU1432	0.0	1	Fungi	unidentified	-	-	-	-	-	Unassigned	-
New.CleanUp.ReferenceOTU17316	2.0	1	Fungi	unidentified	-	-	-	-	-	Unassigned	-
New.CleanUp.ReferenceOTU10223	2.0	1	Fungi	unidentified	-	-	-	-	-	Unassigned	-
New.CleanUp.ReferenceOTU2607	0.0	1	Fungi	unidentified	-	-	-	-	-	Unassigned	-
New.CleanUp.ReferenceOTU9562	4.0	1	Fungi	unidentified	-	-	-	-	-	Unassigned	-
New.CleanUp.ReferenceOTU11524	0.0	1	Fungi	unidentified	-	-	-	-	-	Unassigned	-
New.CleanUp.ReferenceOTU5406	0.0	1	Fungi	unidentified	-	-	-	-	-	Unassigned	-
New.CleanUp.ReferenceOTU7456	0.0	1	Fungi	unidentified	-	-	-	-	-	Unassigned	-
New.CleanUp.ReferenceOTU11455	2.0	1	Fungi	unidentified	-	-	-	-	-	Unassigned	-
New.CleanUp.ReferenceOTU6590	1.0	1	Fungi	unidentified	-	-	-	-	-	Unassigned	-
New.ReferenceOTU188	1.0	1	Fungi	unidentified	-	-	-	-	-	Unassigned	-
New.CleanUp.ReferenceOTU1920	1.0	1	Fungi	unidentified	-	-	-	-	-	Unassigned	-
New.CleanUp.ReferenceOTU3945	0.0	1	Fungi	unidentified	-	-	-	-	-	Unassigned	-
New.CleanUp.ReferenceOTU3700	0.0	1	Fungi	unidentified	-	-	-	-	-	Unassigned	-
New.CleanUp.ReferenceOTU7524	0.0	1	Fungi	unidentified	-	-	-	-	-	Unassigned	-
New.CleanUp.ReferenceOTU8349	8.0	1	Fungi	unidentified	-	-	-	-	-	Unassigned	-
New.CleanUp.ReferenceOTU13699	1.0	1	Fungi	unidentified	-	-	-	-	-	Unassigned	-
New.CleanUp.ReferenceOTU13996	2.0	1	Fungi	unidentified	-	-	-	-	-	Unassigned	-
New.CleanUp.ReferenceOTU15622	1.0	1	Fungi	unidentified	-	-	-	-	-	Unassigned	-
New.CleanUp.ReferenceOTU137	2.0	1	Fungi	unidentified	-	-	-	-	-	Unassigned	-
New.CleanUp.ReferenceOTU9797	1.0	1	Fungi	unidentified	-	-	-	-	-	Unassigned	-
New.CleanUp.ReferenceOTU17002	1.0	1	Fungi	unidentified	-	-	-	-	-	Unassigned	-
New.CleanUp.ReferenceOTU2215	0.0	1	Fungi	unidentified	-	-	-	-	-	Unassigned	-
New.CleanUp.ReferenceOTU2558	0.0	1	Fungi	unidentified	-	-	-	-	-	Unassigned	-
New.CleanUp.ReferenceOTU3964	3.0	1	Fungi	unidentified	-	-	-	-	-	Unassigned	-
New.CleanUp.ReferenceOTU4354	2.0	1	Fungi	unidentified	-	-	-	-	-	Unassigned	-
New.CleanUp.ReferenceOTU6423	1.0	1	Fungi	unidentified	-	-	-	-	-	Unassigned	-
New.CleanUp.ReferenceOTU6962	0.0	1	Fungi	unidentified	-	-	-	-	-	Unassigned	-
New.CleanUp.ReferenceOTU8169	0.0	1	Fungi	unidentified	-	-	-	-	-	Unassigned	-
New.CleanUp.ReferenceOTU8938	0.0	1	Fungi	unidentified	-	-	-	-	-	Unassigned	-
New.CleanUp.ReferenceOTU10578	1.0	1	Fungi	unidentified	-	-	-	-	-	Unassigned	-
New.CleanUp.ReferenceOTU13486	0.0	1	Fungi	unidentified	-	-	-	-	-	Unassigned	-
New.ReferenceOTU201	1.0	10	Fungi	Ascomycota	-	-	-	-	-	Unassigned	-
New.CleanUp.ReferenceOTU15025	102.0	10	Fungi	Ascomycota	-	-	-	-	-	Unassigned	-
New.CleanUp.ReferenceOTU758	0.0	10	Fungi	Ascomycota	-	-	-	-	-	Unassigned	-
New.CleanUp.ReferenceOTU17398	0.0	10	Fungi	Ascomycota	-	-	-	-	-	Unassigned	-
New.CleanUp.ReferenceOTU1733	0.0	10	Fungi	unidentified	-	-	-	-	-	Unassigned	-
New.CleanUp.ReferenceOTU2536	2.0	10	Fungi	unidentified	-	-	-	-	-	Unassigned	-
New.CleanUp.ReferenceOTU711	11.0	10	Fungi	unidentified	-	-	-	-	-	Unassigned	-
New.CleanUp.ReferenceOTU7688	8.0	10	Fungi	unidentified	-	-	-	-	-	Unassigned	-
New.CleanUp.ReferenceOTU556	0.0	10	Fungi	unidentified	-	-	-	-	-	Unassigned	-
New.CleanUp.ReferenceOTU192	0.0	10	Fungi	unidentified	-	-	-	-	-	Unassigned	-
New.CleanUp.ReferenceOTU9628	18.0	103	Fungi	unidentified	-	-	-	-	-	Unassigned	-
New.CleanUp.ReferenceOTU9326	0.0	11	Fungi	Ascomycota	-	-	-	-	-	Unassigned	-
New.CleanUp.ReferenceOTU10969	0.0	11	Fungi	Ascomycota	-	-	-	-	-	Unassigned	-
New.CleanUp.ReferenceOTU9406	0.0	11	Fungi	Basidiomycota	-	-	-	-	-	Unassigned	-
New.CleanUp.ReferenceOTU9275	2.0	11	Fungi	Ascomycota	-	-	-	-	-	Unassigned	-
New.CleanUp.ReferenceOTU4129	5.0	11	Fungi	Ascomycota	-	-	-	-	-	Unassigned	-
New.CleanUp.ReferenceOTU13456	6.0	11	Fungi	unidentified	-	-	-	-	-	Unassigned	-
New.ReferenceOTU10	9.0	11	Fungi	unidentified	-	-	-	-	-	Unassigned	-
New.CleanUp.ReferenceOTU219	4.0	11	Fungi	unidentified	-	-	-	-	-	Unassigned	-
New.CleanUp.ReferenceOTU14557	3.0	11	Fungi	unidentified	-	-	-	-	-	Unassigned	-
New.CleanUp.ReferenceOTU2402	0.0	110	Fungi	Basidiomycota	-	-	-	-	-	Unassigned	-
New.CleanUp.ReferenceOTU2004	0.0	119	Fungi	unidentified	-	-	-	-	-	Unassigned	-
New.CleanUp.ReferenceOTU17251	0.0	12	Fungi	Ascomycota	-	-	-	-	-	Unassigned	-
New.ReferenceOTU53	5.0	12	Fungi	Ascomycota	-	-	-	-	-	Unassigned	-
New.CleanUp.ReferenceOTU3737	0.0	12	Fungi	Blastocladiomycota	-	-	-	-	-	Unassigned	-
New.CleanUp.ReferenceOTU13177	0.0	12	Fungi	unidentified	-	-	-	-	-	Unassigned	-
New.CleanUp.ReferenceOTU12329	6.0	12	Fungi	unidentified	-	-	-	-	-	Unassigned	-
New.CleanUp.ReferenceOTU3569	6.0	12	Fungi	unidentified	-	-	-	-	-	Unassigned	-
New.CleanUp.ReferenceOTU2441	0.0	12	Fungi	unidentified	-	-	-	-	-	Unassigned	-
New.CleanUp.ReferenceOTU14609	0.0	12	Fungi	unidentified	-	-	-	-	-	Unassigned	-
New.ReferenceOTU32	0.0	125	Fungi	Ascomycota	-	-	-	-	-	Unassigned	-
New.CleanUp.ReferenceOTU12725	1.0	13	Fungi	Ascomycota	-	-	-	-	-	Unassigned	-
New.CleanUp.ReferenceOTU16729	0.0	13	Fungi	Ascomycota	-	-	-	-	-	Unassigned	-
New.CleanUp.ReferenceOTU4602	92.0	13	Fungi	unidentified	-	-	-	-	-	Unassigned	-
New.CleanUp.ReferenceOTU17693	7.0	13	Fungi	unidentified	-	-	-	-	-	Unassigned	-
New.CleanUp.ReferenceOTU1267	4.0	13	Fungi	unidentified	-	-	-	-	-	Unassigned	-
New.CleanUp.ReferenceOTU9044	7.0	13	Fungi	unidentified	-	-	-	-	-	Unassigned	-
New.CleanUp.ReferenceOTU13858	20.0	13	Fungi	unidentified	-	-	-	-	-	Unassigned	-
New.CleanUp.ReferenceOTU11527	2.0	13	Fungi	unidentified	-	-	-	-	-	Unassigned	-
New.CleanUp.ReferenceOTU9869	67.0	133	Fungi	Ascomycota	-	-	-	-	-	Unassigned	-
New.CleanUp.ReferenceOTU12525	10.0	137	Fungi	unidentified	-	-	-	-	-	Unassigned	-
New.ReferenceOTU29	25.0	14	Fungi	Ascomycota	-	-	-	-	-	Unassigned	-
New.ReferenceOTU234	0.0	14	Fungi	Ascomycota	-	-	-	-	-	Unassigned	-
New.CleanUp.ReferenceOTU6202	0.0	14	Fungi	unidentified	-	-	-	-	-	Unassigned	-
New.CleanUp.ReferenceOTU5041	0.0	14	Fungi	unidentified	-	-	-	-	-	Unassigned	-
New.CleanUp.ReferenceOTU5472	19.0	144	Fungi	unidentified	-	-	-	-	-	Unassigned	-
SH220576.07FU_EU754946_reps	106.0	1468	Fungi	Ascomycota	-	-	-	-	-	Unassigned	-
New.CleanUp.ReferenceOTU4372	0.0	15	Fungi	Rozellomycota	-	-	-	-	-	Unassigned	-
New.CleanUp.ReferenceOTU7695	33.0	15	Fungi	unidentified	-	-	-	-	-	Unassigned	-
New.CleanUp.ReferenceOTU14783	10.0	15	Fungi	unidentified	-	-	-	-	-	Unassigned	-
New.CleanUp.ReferenceOTU9854	9.0	15	Fungi	unidentified	-	-	-	-	-	Unassigned	-
New.CleanUp.ReferenceOTU1412	21.0	15	Fungi	unidentified	-	-	-	-	-	Unassigned	-
New.CleanUp.ReferenceOTU6904	2.0	15	Fungi	unidentified	-	-	-	-	-	Unassigned	-
New.CleanUp.ReferenceOTU12405	1.0	16	Fungi	Ascomycota	-	-	-	-	-	Unassigned	-
New.CleanUp.ReferenceOTU5737	5.0	16	Fungi	Ascomycota	-	-	-	-	-	Unassigned	-
New.ReferenceOTU73	11.0	16	Fungi	Ascomycota	-	-	-	-	-	Unassigned	-
New.CleanUp.ReferenceOTU9552	7.0	16	Fungi	Ascomycota	-	-	-	-	-	Unassigned	-
New.ReferenceOTU74	0.0	16	Fungi	Rozellomycota	-	-	-	-	-	Unassigned	-
New.CleanUp.ReferenceOTU9495	10.0	16	Fungi	unidentified	-	-	-	-	-	Unassigned	-
New.CleanUp.ReferenceOTU9625	1.0	16	Fungi	unidentified	-	-	-	-	-	Unassigned	-
New.CleanUp.ReferenceOTU5552	0.0	167	Fungi	Ascomycota	-	-	-	-	-	Unassigned	-
New.ReferenceOTU24	370.0	169	Fungi	Basidiomycota	-	-	-	-	-	Unassigned	-
New.CleanUp.ReferenceOTU648	0.0	17	Fungi	Ascomycota	-	-	-	-	-	Unassigned	-
New.CleanUp.ReferenceOTU13303	45.0	17	Fungi	Ascomycota	-	-	-	-	-	Unassigned	-
New.ReferenceOTU43	21.0	171	Fungi	Ascomycota	-	-	-	-	-	Unassigned	-
New.CleanUp.ReferenceOTU10609	0.0	19	Fungi	Ascomycota	-	-	-	-	-	Unassigned	-
New.CleanUp.ReferenceOTU13965	0.0	19	Fungi	Ascomycota	-	-	-	-	-	Unassigned	-
New.CleanUp.ReferenceOTU7474	2.0	2	Fungi	Basidiomycota	-	-	-	-	-	Unassigned	-
New.CleanUp.ReferenceOTU4585	0.0	2	Fungi	Basidiomycota	-	-	-	-	-	Unassigned	-
New.ReferenceOTU139	12.0	2	Fungi	Ascomycota	-	-	-	-	-	Unassigned	-
New.CleanUp.ReferenceOTU10832	30.0	2	Fungi	Ascomycota	-	-	-	-	-	Unassigned	-
New.CleanUp.ReferenceOTU16519	0.0	2	Fungi	Basidiomycota	-	-	-	-	-	Unassigned	-
New.CleanUp.ReferenceOTU15422	0.0	2	Fungi	Basidiomycota	-	-	-	-	-	Unassigned	-
New.CleanUp.ReferenceOTU1687	9.0	2	Fungi	Ascomycota	-	-	-	-	-	Unassigned	-
New.ReferenceOTU162	0.0	2	Fungi	Ascomycota	-	-	-	-	-	Unassigned	-
New.CleanUp.ReferenceOTU6515	0.0	2	Fungi	Ascomycota	-	-	-	-	-	Unassigned	-
New.CleanUp.ReferenceOTU11062	2.0	2	Fungi	Ascomycota	-	-	-	-	-	Unassigned	-
New.CleanUp.ReferenceOTU7029	2.0	2	Fungi	Ascomycota	-	-	-	-	-	Unassigned	-
New.CleanUp.ReferenceOTU14013	2.0	2	Fungi	Ascomycota	-	-	-	-	-	Unassigned	-
New.CleanUp.ReferenceOTU15036	0.0	2	Fungi	Basidiomycota	-	-	-	-	-	Unassigned	-
New.CleanUp.ReferenceOTU11255	2.0	2	Fungi	Basidiomycota	-	-	-	-	-	Unassigned	-
New.CleanUp.ReferenceOTU17293	0.0	2	Fungi	Basidiomycota	-	-	-	-	-	Unassigned	-
New.CleanUp.ReferenceOTU8498	0.0	2	Fungi	Rozellomycota	-	-	-	-	-	Unassigned	-
New.ReferenceOTU56	52.0	2	Fungi	unidentified	-	-	-	-	-	Unassigned	-
New.CleanUp.ReferenceOTU12479	1.0	2	Fungi	unidentified	-	-	-	-	-	Unassigned	-
New.CleanUp.ReferenceOTU14941	0.0	2	Fungi	unidentified	-	-	-	-	-	Unassigned	-
New.CleanUp.ReferenceOTU10043	8.0	2	Fungi	unidentified	-	-	-	-	-	Unassigned	-
New.CleanUp.ReferenceOTU17347	0.0	2	Fungi	unidentified	-	-	-	-	-	Unassigned	-
New.CleanUp.ReferenceOTU17172	0.0	2	Fungi	unidentified	-	-	-	-	-	Unassigned	-
New.CleanUp.ReferenceOTU17609	4.0	2	Fungi	unidentified	-	-	-	-	-	Unassigned	-
New.CleanUp.ReferenceOTU8934	1.0	2	Fungi	unidentified	-	-	-	-	-	Unassigned	-
New.CleanUp.ReferenceOTU9427	6.0	2	Fungi	unidentified	-	-	-	-	-	Unassigned	-
New.CleanUp.ReferenceOTU3637	4.0	2	Fungi	unidentified	-	-	-	-	-	Unassigned	-
New.CleanUp.ReferenceOTU288	0.0	2	Fungi	unidentified	-	-	-	-	-	Unassigned	-
New.CleanUp.ReferenceOTU15870	1.0	2	Fungi	unidentified	-	-	-	-	-	Unassigned	-
New.CleanUp.ReferenceOTU8596	7.0	2	Fungi	unidentified	-	-	-	-	-	Unassigned	-
New.CleanUp.ReferenceOTU13827	1.0	2	Fungi	unidentified	-	-	-	-	-	Unassigned	-
New.CleanUp.ReferenceOTU1494	1.0	2	Fungi	unidentified	-	-	-	-	-	Unassigned	-
New.CleanUp.ReferenceOTU12016	10.0	2	Fungi	unidentified	-	-	-	-	-	Unassigned	-
New.CleanUp.ReferenceOTU9839	1.0	2	Fungi	unidentified	-	-	-	-	-	Unassigned	-
New.CleanUp.ReferenceOTU11082	0.0	2	Fungi	unidentified	-	-	-	-	-	Unassigned	-
New.ReferenceOTU42	1.0	2	Fungi	unidentified	-	-	-	-	-	Unassigned	-
New.CleanUp.ReferenceOTU6775	4.0	2	Fungi	unidentified	-	-	-	-	-	Unassigned	-
New.CleanUp.ReferenceOTU7233	0.0	2	Fungi	unidentified	-	-	-	-	-	Unassigned	-
New.CleanUp.ReferenceOTU10192	0.0	2	Fungi	unidentified	-	-	-	-	-	Unassigned	-
New.CleanUp.ReferenceOTU16561	0.0	2	Fungi	unidentified	-	-	-	-	-	Unassigned	-
New.CleanUp.ReferenceOTU5305	0.0	2	Fungi	unidentified	-	-	-	-	-	Unassigned	-
New.CleanUp.ReferenceOTU12805	0.0	2	Fungi	unidentified	-	-	-	-	-	Unassigned	-
New.CleanUp.ReferenceOTU16204	2.0	2	Fungi	unidentified	-	-	-	-	-	Unassigned	-
New.ReferenceOTU66	0.0	2	Fungi	unidentified	-	-	-	-	-	Unassigned	-
New.CleanUp.ReferenceOTU17348	0.0	2	Fungi	unidentified	-	-	-	-	-	Unassigned	-
New.CleanUp.ReferenceOTU8683	0.0	2	Fungi	unidentified	-	-	-	-	-	Unassigned	-
New.CleanUp.ReferenceOTU15995	0.0	2	Fungi	unidentified	-	-	-	-	-	Unassigned	-
New.CleanUp.ReferenceOTU1182	0.0	2	Fungi	unidentified	-	-	-	-	-	Unassigned	-
New.CleanUp.ReferenceOTU3616	0.0	2	Fungi	unidentified	-	-	-	-	-	Unassigned	-
New.CleanUp.ReferenceOTU5309	1.0	2	Fungi	unidentified	-	-	-	-	-	Unassigned	-
New.CleanUp.ReferenceOTU6248	0.0	2	Fungi	unidentified	-	-	-	-	-	Unassigned	-
SH217942.07FU_JQ246357_reps	5.0	21	Fungi	Ascomycota	-	-	-	-	-	Unassigned	-
New.CleanUp.ReferenceOTU16046	93.0	21	Fungi	Ascomycota	-	-	-	-	-	Unassigned	-
New.CleanUp.ReferenceOTU14054	1.0	21	Fungi	unidentified	-	-	-	-	-	Unassigned	-
New.CleanUp.ReferenceOTU381	2.0	21	Fungi	unidentified	-	-	-	-	-	Unassigned	-
New.CleanUp.ReferenceOTU14658	10.0	22	Fungi	unidentified	-	-	-	-	-	Unassigned	-
New.CleanUp.ReferenceOTU6754	12.0	24	Fungi	unidentified	-	-	-	-	-	Unassigned	-
New.CleanUp.ReferenceOTU4094	36.0	24	Fungi	unidentified	-	-	-	-	-	Unassigned	-
New.CleanUp.ReferenceOTU543	0.0	24	Fungi	unidentified	-	-	-	-	-	Unassigned	-
New.CleanUp.ReferenceOTU12249	0.0	24	Fungi	unidentified	-	-	-	-	-	Unassigned	-
New.CleanUp.ReferenceOTU11303	0.0	25	Fungi	Basidiomycota	-	-	-	-	-	Unassigned	-
New.CleanUp.ReferenceOTU16827	3.0	25	Fungi	unidentified	-	-	-	-	-	Unassigned	-
New.ReferenceOTU178	36.0	251	Fungi	Ascomycota	-	-	-	-	-	Unassigned	-
New.CleanUp.ReferenceOTU8374	0.0	26	Fungi	Ascomycota	-	-	-	-	-	Unassigned	-
New.CleanUp.ReferenceOTU1036	3.0	26	Fungi	unidentified	-	-	-	-	-	Unassigned	-
New.ReferenceOTU229	89.0	268	Fungi	unidentified	-	-	-	-	-	Unassigned	-
New.ReferenceOTU8	1.0	27	Fungi	Ascomycota	-	-	-	-	-	Unassigned	-
New.CleanUp.ReferenceOTU15677	1.0	27	Fungi	Ascomycota	-	-	-	-	-	Unassigned	-
New.ReferenceOTU202	0.0	27	Fungi	unidentified	-	-	-	-	-	Unassigned	-
New.CleanUp.ReferenceOTU8599	0.0	27	Fungi	unidentified	-	-	-	-	-	Unassigned	-
New.CleanUp.ReferenceOTU2417	6.0	27	Fungi	unidentified	-	-	-	-	-	Unassigned	-
New.CleanUp.ReferenceOTU14178	0.0	28	Fungi	unidentified	-	-	-	-	-	Unassigned	-
New.CleanUp.ReferenceOTU2694	0.0	29	Fungi	Ascomycota	-	-	-	-	-	Unassigned	-
New.ReferenceOTU168	369.0	2982	Fungi	Ascomycota	-	-	-	-	-	Unassigned	-
New.ReferenceOTU224	6670.0	3	Fungi	Basidiomycota	-	-	-	-	-	Unassigned	-
New.CleanUp.ReferenceOTU3795	5.0	3	Fungi	Ascomycota	-	-	-	-	-	Unassigned	-
New.CleanUp.ReferenceOTU11389	8.0	3	Fungi	Ascomycota	-	-	-	-	-	Unassigned	-
SH205745.07FU_HM208720_reps	5.0	3	Fungi	Ascomycota	-	-	-	-	-	Unassigned	-
New.CleanUp.ReferenceOTU12713	11.0	3	Fungi	Ascomycota	-	-	-	-	-	Unassigned	-
New.CleanUp.ReferenceOTU772	0.0	3	Fungi	Basidiomycota	-	-	-	-	-	Unassigned	-
New.CleanUp.ReferenceOTU149	5.0	3	Fungi	Basidiomycota	-	-	-	-	-	Unassigned	-
New.CleanUp.ReferenceOTU2281	0.0	3	Fungi	Zygomycota	-	-	-	-	-	Unassigned	-
New.CleanUp.ReferenceOTU12139	0.0	3	Fungi	Zygomycota	-	-	-	-	-	Unassigned	-
New.CleanUp.ReferenceOTU17585	0.0	3	Fungi	Ascomycota	-	-	-	-	-	Unassigned	-
New.CleanUp.ReferenceOTU16631	0.0	3	Fungi	Ascomycota	-	-	-	-	-	Unassigned	-
New.CleanUp.ReferenceOTU6538	1.0	3	Fungi	Ascomycota	-	-	-	-	-	Unassigned	-
New.CleanUp.ReferenceOTU4551	1.0	3	Fungi	Ascomycota	-	-	-	-	-	Unassigned	-
New.CleanUp.ReferenceOTU14925	5.0	3	Fungi	Ascomycota	-	-	-	-	-	Unassigned	-
New.CleanUp.ReferenceOTU11623	1.0	3	Fungi	Ascomycota	-	-	-	-	-	Unassigned	-
New.CleanUp.ReferenceOTU12665	0.0	3	Fungi	Basidiomycota	-	-	-	-	-	Unassigned	-
New.ReferenceOTU144	0.0	3	Fungi	Blastocladiomycota	-	-	-	-	-	Unassigned	-
New.CleanUp.ReferenceOTU16671	43.0	3	Fungi	unidentified	-	-	-	-	-	Unassigned	-
New.ReferenceOTU157	216.0	3	Fungi	unidentified	-	-	-	-	-	Unassigned	-
New.CleanUp.ReferenceOTU10390	5.0	3	Fungi	unidentified	-	-	-	-	-	Unassigned	-
New.CleanUp.ReferenceOTU10968	0.0	3	Fungi	unidentified	-	-	-	-	-	Unassigned	-
New.CleanUp.ReferenceOTU2825	1.0	3	Fungi	unidentified	-	-	-	-	-	Unassigned	-
New.CleanUp.ReferenceOTU6176	1.0	3	Fungi	unidentified	-	-	-	-	-	Unassigned	-
New.CleanUp.ReferenceOTU16546	4.0	3	Fungi	unidentified	-	-	-	-	-	Unassigned	-
New.CleanUp.ReferenceOTU5328	10.0	3	Fungi	unidentified	-	-	-	-	-	Unassigned	-
New.CleanUp.ReferenceOTU2723	0.0	3	Fungi	unidentified	-	-	-	-	-	Unassigned	-
New.CleanUp.ReferenceOTU9400	1.0	3	Fungi	unidentified	-	-	-	-	-	Unassigned	-
New.CleanUp.ReferenceOTU13684	0.0	3	Fungi	unidentified	-	-	-	-	-	Unassigned	-
New.CleanUp.ReferenceOTU15578	1.0	3	Fungi	unidentified	-	-	-	-	-	Unassigned	-
New.CleanUp.ReferenceOTU14110	0.0	3	Fungi	unidentified	-	-	-	-	-	Unassigned	-
New.CleanUp.ReferenceOTU5853	0.0	3	Fungi	unidentified	-	-	-	-	-	Unassigned	-
New.CleanUp.ReferenceOTU10516	0.0	3	Fungi	unidentified	-	-	-	-	-	Unassigned	-
New.CleanUp.ReferenceOTU15218	0.0	3	Fungi	unidentified	-	-	-	-	-	Unassigned	-
New.CleanUp.ReferenceOTU11637	0.0	3	Fungi	unidentified	-	-	-	-	-	Unassigned	-
New.CleanUp.ReferenceOTU13702	0.0	3	Fungi	unidentified	-	-	-	-	-	Unassigned	-
New.CleanUp.ReferenceOTU3420	0.0	3	Fungi	unidentified	-	-	-	-	-	Unassigned	-
New.CleanUp.ReferenceOTU1340	2.0	3	Fungi	unidentified	-	-	-	-	-	Unassigned	-
New.CleanUp.ReferenceOTU5254	0.0	3	Fungi	unidentified	-	-	-	-	-	Unassigned	-
New.CleanUp.ReferenceOTU8478	0.0	3	Fungi	unidentified	-	-	-	-	-	Unassigned	-
New.CleanUp.ReferenceOTU9864	0.0	3	Fungi	unidentified	-	-	-	-	-	Unassigned	-
New.CleanUp.ReferenceOTU793	1.0	30	Fungi	Ascomycota	-	-	-	-	-	Unassigned	-
New.CleanUp.ReferenceOTU9483	186.0	30	Fungi	Basidiomycota	-	-	-	-	-	Unassigned	-
New.ReferenceOTU18	91.0	316	Fungi	unidentified	-	-	-	-	-	Unassigned	-
New.CleanUp.ReferenceOTU8382	0.0	317	Fungi	Rozellomycota	-	-	-	-	-	Unassigned	-
New.CleanUp.ReferenceOTU14907	10.0	33	Fungi	Basidiomycota	-	-	-	-	-	Unassigned	-
New.CleanUp.ReferenceOTU1227	2.0	33	Fungi	Ascomycota	-	-	-	-	-	Unassigned	-
New.CleanUp.ReferenceOTU15435	10.0	34	Fungi	unidentified	-	-	-	-	-	Unassigned	-
New.CleanUp.ReferenceOTU10594	0.0	36	Fungi	unidentified	-	-	-	-	-	Unassigned	-
New.CleanUp.ReferenceOTU1638	8.0	4	Fungi	Basidiomycota	-	-	-	-	-	Unassigned	-
New.CleanUp.ReferenceOTU4097	6.0	4	Fungi	Basidiomycota	-	-	-	-	-	Unassigned	-
New.CleanUp.ReferenceOTU3670	0.0	4	Fungi	Ascomycota	-	-	-	-	-	Unassigned	-
New.CleanUp.ReferenceOTU15628	0.0	4	Fungi	Basidiomycota	-	-	-	-	-	Unassigned	-
New.CleanUp.ReferenceOTU14992	1.0	4	Fungi	Zygomycota	-	-	-	-	-	Unassigned	-
New.CleanUp.ReferenceOTU8183	7.0	4	Fungi	Zygomycota	-	-	-	-	-	Unassigned	-
New.ReferenceOTU212	14.0	4	Fungi	Ascomycota	-	-	-	-	-	Unassigned	-
New.CleanUp.ReferenceOTU8143	4.0	4	Fungi	Ascomycota	-	-	-	-	-	Unassigned	-
New.CleanUp.ReferenceOTU3630	13.0	4	Fungi	Basidiomycota	-	-	-	-	-	Unassigned	-
New.CleanUp.ReferenceOTU6044	0.0	4	Fungi	Ascomycota	-	-	-	-	-	Unassigned	-
New.CleanUp.ReferenceOTU7379	0.0	4	Fungi	Ascomycota	-	-	-	-	-	Unassigned	-
New.CleanUp.ReferenceOTU6535	10.0	4	Fungi	Basidiomycota	-	-	-	-	-	Unassigned	-
New.CleanUp.ReferenceOTU13908	0.0	4	Fungi	Rozellomycota	-	-	-	-	-	Unassigned	-
New.CleanUp.ReferenceOTU15898	5.0	4	Fungi	unidentified	-	-	-	-	-	Unassigned	-
New.CleanUp.ReferenceOTU6205	0.0	4	Fungi	unidentified	-	-	-	-	-	Unassigned	-
New.CleanUp.ReferenceOTU17651	0.0	4	Fungi	unidentified	-	-	-	-	-	Unassigned	-
New.CleanUp.ReferenceOTU12112	7.0	4	Fungi	unidentified	-	-	-	-	-	Unassigned	-
New.CleanUp.ReferenceOTU894	8.0	4	Fungi	unidentified	-	-	-	-	-	Unassigned	-
New.CleanUp.ReferenceOTU1495	0.0	4	Fungi	unidentified	-	-	-	-	-	Unassigned	-
New.CleanUp.ReferenceOTU11974	0.0	4	Fungi	unidentified	-	-	-	-	-	Unassigned	-
New.CleanUp.ReferenceOTU16212	1.0	4	Fungi	unidentified	-	-	-	-	-	Unassigned	-
New.ReferenceOTU7	0.0	4	Fungi	unidentified	-	-	-	-	-	Unassigned	-
New.CleanUp.ReferenceOTU5125	0.0	4	Fungi	unidentified	-	-	-	-	-	Unassigned	-
New.CleanUp.ReferenceOTU1622	1.0	4	Fungi	unidentified	-	-	-	-	-	Unassigned	-
New.CleanUp.ReferenceOTU5784	5.0	4	Fungi	unidentified	-	-	-	-	-	Unassigned	-
New.CleanUp.ReferenceOTU7611	0.0	4	Fungi	unidentified	-	-	-	-	-	Unassigned	-
New.CleanUp.ReferenceOTU13310	0.0	4	Fungi	unidentified	-	-	-	-	-	Unassigned	-
New.CleanUp.ReferenceOTU1936	3.0	4	Fungi	unidentified	-	-	-	-	-	Unassigned	-
New.CleanUp.ReferenceOTU12376	0.0	4	Fungi	unidentified	-	-	-	-	-	Unassigned	-
New.CleanUp.ReferenceOTU11386	0.0	4	Fungi	unidentified	-	-	-	-	-	Unassigned	-
New.CleanUp.ReferenceOTU8704	0.0	4	Fungi	unidentified	-	-	-	-	-	Unassigned	-
New.CleanUp.ReferenceOTU4725	3.0	4	Fungi	unidentified	-	-	-	-	-	Unassigned	-
New.CleanUp.ReferenceOTU4147	1.0	4	Fungi	unidentified	-	-	-	-	-	Unassigned	-
New.CleanUp.ReferenceOTU17664	10.0	40	Fungi	Ascomycota	-	-	-	-	-	Unassigned	-
New.ReferenceOTU196	53.0	40	Fungi	Basidiomycota	-	-	-	-	-	Unassigned	-
New.ReferenceOTU55	7.0	42	Fungi	unidentified	-	-	-	-	-	Unassigned	-
New.CleanUp.ReferenceOTU12608	31.0	43	Fungi	Ascomycota	-	-	-	-	-	Unassigned	-
New.CleanUp.ReferenceOTU11045	63.0	46	Fungi	unidentified	-	-	-	-	-	Unassigned	-
New.CleanUp.ReferenceOTU13132	30.0	46	Fungi	unidentified	-	-	-	-	-	Unassigned	-
New.ReferenceOTU79	160.0	470	Fungi	Ascomycota	-	-	-	-	-	Unassigned	-
New.ReferenceOTU110	59.0	48	Fungi	Ascomycota	-	-	-	-	-	Unassigned	-
New.ReferenceOTU134	613.0	494	Fungi	Basidiomycota	-	-	-	-	-	Unassigned	-
New.CleanUp.ReferenceOTU15623	3.0	5	Fungi	Basidiomycota	-	-	-	-	-	Unassigned	-
New.CleanUp.ReferenceOTU4871	3.0	5	Fungi	Basidiomycota	-	-	-	-	-	Unassigned	-
New.CleanUp.ReferenceOTU9251	0.0	5	Fungi	Ascomycota	-	-	-	-	-	Unassigned	-
New.CleanUp.ReferenceOTU2198	0.0	5	Fungi	Ascomycota	-	-	-	-	-	Unassigned	-
New.CleanUp.ReferenceOTU14069	2.0	5	Fungi	Ascomycota	-	-	-	-	-	Unassigned	-
New.CleanUp.ReferenceOTU3634	2.0	5	Fungi	Basidiomycota	-	-	-	-	-	Unassigned	-
New.CleanUp.ReferenceOTU12149	0.0	5	Fungi	Basidiomycota	-	-	-	-	-	Unassigned	-
New.CleanUp.ReferenceOTU6187	3.0	5	Fungi	Ascomycota	-	-	-	-	-	Unassigned	-
New.CleanUp.ReferenceOTU4228	13.0	5	Fungi	Ascomycota	-	-	-	-	-	Unassigned	-
New.CleanUp.ReferenceOTU8461	0.0	5	Fungi	Ascomycota	-	-	-	-	-	Unassigned	-
New.CleanUp.ReferenceOTU11378	0.0	5	Fungi	Basidiomycota	-	-	-	-	-	Unassigned	-
New.ReferenceOTU214	0.0	5	Fungi	unidentified	-	-	-	-	-	Unassigned	-
New.CleanUp.ReferenceOTU14141	0.0	5	Fungi	unidentified	-	-	-	-	-	Unassigned	-
New.ReferenceOTU51	72.0	5	Fungi	unidentified	-	-	-	-	-	Unassigned	-
New.CleanUp.ReferenceOTU17841	24.0	5	Fungi	unidentified	-	-	-	-	-	Unassigned	-
New.CleanUp.ReferenceOTU2207	3.0	5	Fungi	unidentified	-	-	-	-	-	Unassigned	-
New.CleanUp.ReferenceOTU12082	34.0	5	Fungi	unidentified	-	-	-	-	-	Unassigned	-
New.CleanUp.ReferenceOTU9676	9.0	5	Fungi	unidentified	-	-	-	-	-	Unassigned	-
New.CleanUp.ReferenceOTU16281	0.0	5	Fungi	unidentified	-	-	-	-	-	Unassigned	-
New.CleanUp.ReferenceOTU2367	9.0	5	Fungi	unidentified	-	-	-	-	-	Unassigned	-
New.CleanUp.ReferenceOTU262	0.0	5	Fungi	unidentified	-	-	-	-	-	Unassigned	-
New.CleanUp.ReferenceOTU17119	6.0	5	Fungi	unidentified	-	-	-	-	-	Unassigned	-
New.CleanUp.ReferenceOTU621	2.0	5	Fungi	unidentified	-	-	-	-	-	Unassigned	-
New.CleanUp.ReferenceOTU2023	1.0	5	Fungi	unidentified	-	-	-	-	-	Unassigned	-
New.CleanUp.ReferenceOTU770	0.0	5	Fungi	unidentified	-	-	-	-	-	Unassigned	-
New.CleanUp.ReferenceOTU7199	0.0	5	Fungi	unidentified	-	-	-	-	-	Unassigned	-
New.CleanUp.ReferenceOTU5497	0.0	5	Fungi	unidentified	-	-	-	-	-	Unassigned	-
New.CleanUp.ReferenceOTU8316	1.0	5	Fungi	unidentified	-	-	-	-	-	Unassigned	-
New.CleanUp.ReferenceOTU9784	1.0	5	Fungi	unidentified	-	-	-	-	-	Unassigned	-
New.CleanUp.ReferenceOTU2073	0.0	5	Fungi	unidentified	-	-	-	-	-	Unassigned	-
New.CleanUp.ReferenceOTU10751	0.0	5	Fungi	unidentified	-	-	-	-	-	Unassigned	-
New.CleanUp.ReferenceOTU15930	0.0	5	Fungi	unidentified	-	-	-	-	-	Unassigned	-
New.CleanUp.ReferenceOTU15805	0.0	5	Fungi	unidentified	-	-	-	-	-	Unassigned	-
New.ReferenceOTU146	8.0	50	Fungi	Ascomycota	-	-	-	-	-	Unassigned	-
New.ReferenceOTU236	17.0	50	Fungi	Ascomycota	-	-	-	-	-	Unassigned	-
New.CleanUp.ReferenceOTU15690	61.0	50	Fungi	unidentified	-	-	-	-	-	Unassigned	-
New.CleanUp.ReferenceOTU5263	29.0	51	Fungi	unidentified	-	-	-	-	-	Unassigned	-
New.CleanUp.ReferenceOTU4887	1.0	53	Fungi	Ascomycota	-	-	-	-	-	Unassigned	-
New.CleanUp.ReferenceOTU5160	0.0	53	Fungi	Ascomycota	-	-	-	-	-	Unassigned	-
New.CleanUp.ReferenceOTU9996	0.0	556	Fungi	Basidiomycota	-	-	-	-	-	Unassigned	-
New.CleanUp.ReferenceOTU7787	0.0	59	Fungi	unidentified	-	-	-	-	-	Unassigned	-
New.CleanUp.ReferenceOTU8521	10.0	6	Fungi	Ascomycota	-	-	-	-	-	Unassigned	-
New.CleanUp.ReferenceOTU15726	0.0	6	Fungi	Ascomycota	-	-	-	-	-	Unassigned	-
New.CleanUp.ReferenceOTU17636	0.0	6	Fungi	Basidiomycota	-	-	-	-	-	Unassigned	-
New.CleanUp.ReferenceOTU12573	0.0	6	Fungi	Basidiomycota	-	-	-	-	-	Unassigned	-
New.CleanUp.ReferenceOTU2864	2.0	6	Fungi	Zygomycota	-	-	-	-	-	Unassigned	-
New.CleanUp.ReferenceOTU232	2.0	6	Fungi	Ascomycota	-	-	-	-	-	Unassigned	-
New.CleanUp.ReferenceOTU9455	12.0	6	Fungi	Ascomycota	-	-	-	-	-	Unassigned	-
New.CleanUp.ReferenceOTU13104	1.0	6	Fungi	unidentified	-	-	-	-	-	Unassigned	-
New.CleanUp.ReferenceOTU3494	23.0	6	Fungi	unidentified	-	-	-	-	-	Unassigned	-
New.CleanUp.ReferenceOTU10046	1.0	6	Fungi	unidentified	-	-	-	-	-	Unassigned	-
New.CleanUp.ReferenceOTU4701	3.0	6	Fungi	unidentified	-	-	-	-	-	Unassigned	-
New.CleanUp.ReferenceOTU9250	5.0	6	Fungi	unidentified	-	-	-	-	-	Unassigned	-
New.CleanUp.ReferenceOTU13392	14.0	6	Fungi	unidentified	-	-	-	-	-	Unassigned	-
New.CleanUp.ReferenceOTU6566	6.0	6	Fungi	unidentified	-	-	-	-	-	Unassigned	-
New.CleanUp.ReferenceOTU1962	0.0	6	Fungi	unidentified	-	-	-	-	-	Unassigned	-
New.CleanUp.ReferenceOTU3437	0.0	6	Fungi	unidentified	-	-	-	-	-	Unassigned	-
New.CleanUp.ReferenceOTU11347	0.0	60	Fungi	Rozellomycota	-	-	-	-	-	Unassigned	-
New.CleanUp.ReferenceOTU1611	12.0	7	Fungi	Basidiomycota	-	-	-	-	-	Unassigned	-
New.CleanUp.ReferenceOTU13645	0.0	7	Fungi	Ascomycota	-	-	-	-	-	Unassigned	-
New.CleanUp.ReferenceOTU5733	0.0	7	Fungi	Basidiomycota	-	-	-	-	-	Unassigned	-
New.ReferenceOTU204	0.0	7	Fungi	Blastocladiomycota	-	-	-	-	-	Unassigned	-
New.CleanUp.ReferenceOTU14768	0.0	7	Fungi	unidentified	-	-	-	-	-	Unassigned	-
New.CleanUp.ReferenceOTU2382	0.0	7	Fungi	unidentified	-	-	-	-	-	Unassigned	-
New.CleanUp.ReferenceOTU1583	4.0	7	Fungi	unidentified	-	-	-	-	-	Unassigned	-
New.CleanUp.ReferenceOTU5723	0.0	7	Fungi	unidentified	-	-	-	-	-	Unassigned	-
New.CleanUp.ReferenceOTU7795	0.0	7	Fungi	unidentified	-	-	-	-	-	Unassigned	-
New.CleanUp.ReferenceOTU3105	1.0	7	Fungi	unidentified	-	-	-	-	-	Unassigned	-
New.CleanUp.ReferenceOTU2736	0.0	7	Fungi	unidentified	-	-	-	-	-	Unassigned	-
New.CleanUp.ReferenceOTU5512	0.0	7	Fungi	unidentified	-	-	-	-	-	Unassigned	-
New.CleanUp.ReferenceOTU14376	256.0	70	Fungi	Ascomycota	-	-	-	-	-	Unassigned	-
New.ReferenceOTU96	534.0	708	Fungi	Basidiomycota	-	-	-	-	-	Unassigned	-
New.CleanUp.ReferenceOTU4459	5.0	8	Fungi	Ascomycota	-	-	-	-	-	Unassigned	-
New.CleanUp.ReferenceOTU6324	11.0	8	Fungi	Ascomycota	-	-	-	-	-	Unassigned	-
New.CleanUp.ReferenceOTU2765	0.0	8	Fungi	Ascomycota	-	-	-	-	-	Unassigned	-
New.CleanUp.ReferenceOTU15324	5.0	8	Fungi	Basidiomycota	-	-	-	-	-	Unassigned	-
New.ReferenceOTU130	0.0	8	Fungi	unidentified	-	-	-	-	-	Unassigned	-
New.CleanUp.ReferenceOTU3696	0.0	8	Fungi	unidentified	-	-	-	-	-	Unassigned	-
New.CleanUp.ReferenceOTU10959	0.0	8	Fungi	unidentified	-	-	-	-	-	Unassigned	-
New.CleanUp.ReferenceOTU1295	3.0	8	Fungi	unidentified	-	-	-	-	-	Unassigned	-
New.CleanUp.ReferenceOTU14149	0.0	8	Fungi	unidentified	-	-	-	-	-	Unassigned	-
New.CleanUp.ReferenceOTU2837	0.0	8	Fungi	unidentified	-	-	-	-	-	Unassigned	-
New.CleanUp.ReferenceOTU8086	2.0	8	Fungi	unidentified	-	-	-	-	-	Unassigned	-
New.CleanUp.ReferenceOTU16707	9.0	8	Fungi	unidentified	-	-	-	-	-	Unassigned	-
New.CleanUp.ReferenceOTU7905	0.0	8	Fungi	unidentified	-	-	-	-	-	Unassigned	-
New.CleanUp.ReferenceOTU16047	0.0	9	Fungi	Ascomycota	-	-	-	-	-	Unassigned	-
New.CleanUp.ReferenceOTU408	0.0	9	Fungi	Ascomycota	-	-	-	-	-	Unassigned	-
New.CleanUp.ReferenceOTU9357	0.0	9	Fungi	Ascomycota	-	-	-	-	-	Unassigned	-
New.CleanUp.ReferenceOTU2506	18.0	9	Fungi	Ascomycota	-	-	-	-	-	Unassigned	-
New.CleanUp.ReferenceOTU259	0.0	9	Fungi	Ascomycota	-	-	-	-	-	Unassigned	-
New.ReferenceOTU192	0.0	9	Fungi	Rozellomycota	-	-	-	-	-	Unassigned	-
New.ReferenceOTU39	7.0	9	Fungi	unidentified	-	-	-	-	-	Unassigned	-
New.CleanUp.ReferenceOTU13654	9.0	9	Fungi	unidentified	-	-	-	-	-	Unassigned	-
New.CleanUp.ReferenceOTU15188	0.0	9	Fungi	unidentified	-	-	-	-	-	Unassigned	-
New.CleanUp.ReferenceOTU4796	0.0	9	Fungi	unidentified	-	-	-	-	-	Unassigned	-
New.CleanUp.ReferenceOTU12368	0.0	9	Fungi	unidentified	-	-	-	-	-	Unassigned	-
New.CleanUp.ReferenceOTU8057	0.0	9	Fungi	unidentified	-	-	-	-	-	Unassigned	-
New.CleanUp.ReferenceOTU1749	0.0	9	Fungi	unidentified	-	-	-	-	-	Unassigned	-
OTU ID	AS1	AWS	taxonomy	Taxon	Citation/Source
New.CleanUp.ReferenceOTU937	8.0	164	Fungi	Ascomycota	Pathogen-Saprotroph-Symbiotroph	Animal Pathogen-Endophyte-Fungal Parasite-Plant Pathogen-Wood Saprotroph	Possible	Microfungus	Soft Rot	Endophyte detection method-culture (Hanada et al. 2010, Del Olmo-Ruiz & Arnold 2014)	Likely opportunistic human pathogen (Irinyi et al. 2015)	Duncan CG, Eslyn WE. 1966. Mycologia 58:642-64	Nilsson T. 1973. Studies on wood degradation and cellulolytic activity of microfungi. No. 104	Worrall JJ, et al. 1997. Mycologia 89: 199-219	Hanada RE, et al. 2010. Fungal Biology 114:901-910	Del Olmo-Ruiz M, Arnold AE. 2014. Mycologia 106:8-21	Tedersoo L, et al. 2014. Science 346:1256688	Irinyi L, et al. 2015. Medical Mycology 53:313-337
New.CleanUp.ReferenceOTU10140	7.0	283	Fungi	Ascomycota	Pathogen-Saprotroph-Symbiotroph	Animal Pathogen-Endophyte-Fungal Parasite-Plant Pathogen-Wood Saprotroph	Possible	Microfungus	Soft Rot	Endophyte detection method-culture (Hanada et al. 2010, Del Olmo-Ruiz & Arnold 2014)	Likely opportunistic human pathogen (Irinyi et al. 2015)	Duncan CG, Eslyn WE. 1966. Mycologia 58:642-64	Nilsson T. 1973. Studies on wood degradation and cellulolytic activity of microfungi. No. 104	Worrall JJ, et al. 1997. Mycologia 89: 199-219	Hanada RE, et al. 2010. Fungal Biology 114:901-910	Del Olmo-Ruiz M, Arnold AE. 2014. Mycologia 106:8-21	Tedersoo L, et al. 2014. Science 346:1256688	Irinyi L, et al. 2015. Medical Mycology 53:313-337
New.CleanUp.ReferenceOTU12283	1.0	3	Fungi	Ascomycota	Pathogen-Saprotroph-Symbiotroph	Animal Pathogen-Endophyte-Fungal Parasite-Plant Pathogen-Wood Saprotroph	Possible	Microfungus	Soft Rot	Endophyte detection method-culture (Hanada et al. 2010, Del Olmo-Ruiz & Arnold 2014)	Likely opportunistic human pathogen (Irinyi et al. 2015)	Duncan CG, Eslyn WE. 1966. Mycologia 58:642-64	Nilsson T. 1973. Studies on wood degradation and cellulolytic activity of microfungi. No. 104	Worrall JJ, et al. 1997. Mycologia 89: 199-219	Hanada RE, et al. 2010. Fungal Biology 114:901-910	Del Olmo-Ruiz M, Arnold AE. 2014. Mycologia 106:8-21	Tedersoo L, et al. 2014. Science 346:1256688	Irinyi L, et al. 2015. Medical Mycology 53:313-337
New.CleanUp.ReferenceOTU12795	0.0	7	Fungi	Ascomycota	Pathogen-Saprotroph-Symbiotroph	Animal Pathogen-Endophyte-Fungal Parasite-Plant Pathogen-Wood Saprotroph	Possible	Microfungus	Soft Rot	Endophyte detection method-culture (Hanada et al. 2010, Del Olmo-Ruiz & Arnold 2014)	Likely opportunistic human pathogen (Irinyi et al. 2015)	Duncan CG, Eslyn WE. 1966. Mycologia 58:642-64	Nilsson T. 1973. Studies on wood degradation and cellulolytic activity of microfungi. No. 104	Worrall JJ, et al. 1997. Mycologia 89: 199-219	Hanada RE, et al. 2010. Fungal Biology 114:901-910	Del Olmo-Ruiz M, Arnold AE. 2014. Mycologia 106:8-21	Tedersoo L, et al. 2014. Science 346:1256688	Irinyi L, et al. 2015. Medical Mycology 53:313-337
New.CleanUp.ReferenceOTU12825	2.0	1	Fungi	Ascomycota	Pathotroph	Animal Pathogen	Probable	Microfungus	NULL	Likely opportunistic human pathogen (Irinyi et al. 2015)	Irinyi L, et al. 2015. Medical Mycology 53:313-337
New.CleanUp.ReferenceOTU79	122.0	1	Fungi	Ascomycota	Pathotroph	Animal Pathogen	Probable	Microfungus	NULL	Likely opportunistic human pathogen (Irinyi et al. 2015)	Irinyi L, et al. 2015. Medical Mycology 53:313-337
New.CleanUp.ReferenceOTU14184	15.0	1	Fungi	Ascomycota	Pathotroph	Animal Pathogen	Probable	NULL	NULL	NULL	Tedersoo L, et al. 2014. Science 346:1256688
New.ReferenceOTU41	0.0	1	Fungi	Ascomycota	Pathotroph	Plant Pathogen	Probable	Microfungus	NULL	Species in this family cause rice blast and take-all	Usually necrotrophic on roots (Cannon & Kirk 2007)	Cannon PF, Kirk PM. 2007. Fungal Families of the World. CAB International, Cambridge
New.CleanUp.ReferenceOTU8517	0.0	1	Fungi	Ascomycota	Pathotroph	Plant Pathogen	Probable	Microfungus	Blue-Staining	At least most species are transmitted via insect vectors, with mycelial colonies developing in bark-boring beetle galleries and spreading through the vascular system	they are highly specific to their beetle vectors. In some cases spores and mycelium are transmitted in specialized organs, termed mycangia (Cannon & Kirk 2007)	Cannon PF, Kirk PM. 2007. Fungal Families of the World. CAB International, Cambridge	Tedersoo L, et al. 2014. Science 346:1256688
New.CleanUp.ReferenceOTU574	0.0	1	Fungi	Basidiomycota	Pathotroph	Animal Pathogen	Possible	Yeast	NULL	Pathogenic to humans	Nath R, et al. 2018. Mycopathologia 183:585 (https://doi.org/10.1007/s11046-017-0231-8)
New.CleanUp.ReferenceOTU7206	0.0	10	Fungi	Ascomycota	Pathotroph	Animal Pathogen	Probable	NULL	NULL	NULL	Tedersoo L, et al. 2014. Science 346:1256688
New.CleanUp.ReferenceOTU8700	16.0	11	Fungi	Basidiomycota	Pathotroph	Animal Pathogen	Possible	Yeast	NULL	Pathogenic to humans	Nath R, et al. 2018. Mycopathologia 183:585 (https://doi.org/10.1007/s11046-017-0231-8)
New.ReferenceOTU63	639.0	14	Fungi	Ascomycota	Pathotroph	Animal Pathogen	Probable	NULL	NULL	NULL	Tedersoo L, et al. 2014. Science 346:1256688
New.CleanUp.ReferenceOTU17919	52.0	14	Fungi	Basidiomycota	Pathotroph	Fungal Parasite	Probable	Facultative Yeast	NULL	NULL	Tedersoo L, et al. 2014. Science 346:1256688
New.CleanUp.ReferenceOTU9665	2.0	15	Fungi	Ascomycota	Pathotroph	Animal Pathogen	Probable	NULL	NULL	NULL	Tedersoo L, et al. 2014. Science 346:1256688
New.ReferenceOTU167	19.0	15	Fungi	Ascomycota	Pathotroph	Plant Pathogen	Probable	NULL	NULL	NULL	Tedersoo L, et al. 2014. Science 346:1256688
New.CleanUp.ReferenceOTU8748	1.0	16	Fungi	Ascomycota	Pathotroph	Fungal Parasite	Highly Probable	Microfungus	NULL	NULL	List compiled by John Plischke III (http://home.comcast.net/~grifola/fungionfungi.pdf)
New.CleanUp.ReferenceOTU11076	2.0	16	Fungi	Ascomycota	Pathotroph	Plant Pathogen	Probable	NULL	NULL	NULL	Tedersoo L, et al. 2014. Science 346:1256688
New.CleanUp.ReferenceOTU4116	0.0	17	Fungi	Basidiomycota	Pathotroph	Animal Pathogen	Probable	NULL	NULL	Likely opportunistic human pathogen (Irinyi et al. 2015)	Irinyi L, et al. 2015. Medical Mycology 53:313-337	http://www.cdc.gov
New.ReferenceOTU101	1.0	18	Fungi	Basidiomycota	Pathotroph	Animal Pathogen	Possible	Yeast	NULL	Pathogenic to humans	Nath R, et al. 2018. Mycopathologia 183:585 (https://doi.org/10.1007/s11046-017-0231-8)
New.ReferenceOTU126	239.0	198	Fungi	Ascomycota	Pathotroph	Plant Pathogen	Probable	NULL	NULL	NULL	Tedersoo L, et al. 2014. Science 346:1256688
New.ReferenceOTU34	0.0	2	Fungi	Chytridiomycota	Pathotroph	Plant Pathogen	Probable	NULL	NULL	NULL	Tedersoo L, et al. 2014. Science 346:1256688
New.CleanUp.ReferenceOTU16061	3.0	2	Fungi	Chytridiomycota	Pathotroph	Plant Pathogen	Probable	NULL	NULL	NULL	Tedersoo L, et al. 2014. Science 346:1256688
New.CleanUp.ReferenceOTU7048	0.0	2	Fungi	Ascomycota	Pathotroph	Plant Pathogen	Probable	NULL	NULL	NULL	http://www.apsnet.org/publications/commonnames/Pages/default.aspx
New.CleanUp.ReferenceOTU9964	0.0	2	Fungi	Ascomycota	Pathotroph	Plant Pathogen	Probable	NULL	NULL	NULL	Tedersoo L, et al. 2014. Science 346:1256688
New.CleanUp.ReferenceOTU4678	0.0	2	Fungi	Ascomycota	Pathotroph	Animal Pathogen	Probable	NULL	NULL	NULL	Tedersoo L, et al. 2014. Science 346:1256688
New.CleanUp.ReferenceOTU9343	5.0	2	Fungi	Zygomycota	Pathotroph	Fungal Parasite	Probable	NULL	NULL	NULL	Tedersoo L, et al. 2014. Science 346:1256688
New.CleanUp.ReferenceOTU15875	49.0	21	Fungi	Ascomycota	Pathotroph	Plant Pathogen	Probable	Microfungus	Blue-Staining	At least most species are transmitted via insect vectors, with mycelial colonies developing in bark-boring beetle galleries and spreading through the vascular system	they are highly specific to their beetle vectors. In some cases spores and mycelium are transmitted in specialized organs, termed mycangia (Cannon & Kirk 2007)	Cannon PF, Kirk PM. 2007. Fungal Families of the World. CAB International, Cambridge	Tedersoo L, et al. 2014. Science 346:1256688
New.CleanUp.ReferenceOTU5849	10.0	21	Fungi	Ascomycota	Pathotroph	Animal Pathogen	Probable	NULL	NULL	NULL	Tedersoo L, et al. 2014. Science 346:1256688
New.CleanUp.ReferenceOTU9648	7.0	24	Fungi	Ascomycota	Pathotroph	Animal Pathogen	Probable	NULL	NULL	NULL	Tedersoo L, et al. 2014. Science 346:1256688
New.CleanUp.ReferenceOTU3170	2.0	3	Fungi	Ascomycota	Pathotroph	Plant Pathogen	Probable	NULL	NULL	NULL	Tedersoo L, et al. 2014. Science 346:1256688 (doi:10.1126/science.1256688)
New.CleanUp.ReferenceOTU10497	8.0	3	Fungi	Ascomycota	Pathotroph	Plant Pathogen	Probable	NULL	NULL	NULL	Tedersoo L, et al. 2014. Science 346:1256688
New.CleanUp.ReferenceOTU10034	0.0	3	Fungi	Ascomycota	Pathotroph	Animal Pathogen	Probable	NULL	NULL	NULL	Tedersoo L, et al. 2014. Science 346:1256688
New.CleanUp.ReferenceOTU12620	1.0	3	Fungi	Ascomycota	Pathotroph	Animal Pathogen	Probable	NULL	NULL	NULL	Tedersoo L, et al. 2014. Science 346:1256688
New.CleanUp.ReferenceOTU17662	0.0	3	Fungi	Ascomycota	Pathotroph	Plant Pathogen	Probable	NULL	NULL	NULL	Tedersoo L, et al. 2014. Science 346:1256688
SH527845.07FU_KM265891_reps	20.0	348	Fungi	Ascomycota	Pathotroph	Plant Pathogen	Probable	NULL	NULL	NULL	Tedersoo L, et al. 2014. Science 346:1256688
New.ReferenceOTU19	0.0	4	Fungi	Ascomycota	Pathotroph	Endophyte-Plant Pathogen	Possible	NULL	NULL	Host - Asteraceae	Costa IPMW, et al. 2012. Mycotaxon 119:26
New.CleanUp.ReferenceOTU8701	2.0	4	Fungi	Zygomycota	Pathotroph	Fungal Parasite	Probable	NULL	NULL	NULL	Tedersoo L, et al. 2014. Science 346:1256688
New.CleanUp.ReferenceOTU8987	0.0	4	Fungi	Zygomycota	Pathotroph	Fungal Parasite	Probable	NULL	NULL	NULL	Tedersoo L, et al. 2014. Science 346:1256688
New.CleanUp.ReferenceOTU16320	0.0	5	Fungi	Ascomycota	Pathotroph	Plant Pathogen	Probable	NULL	NULL	NULL	Tedersoo L, et al. 2014. Science 346:1256688
New.CleanUp.ReferenceOTU16366	16.0	64	Fungi	Ascomycota	Pathotroph	Plant Pathogen	Probable	NULL	NULL	NULL	Tedersoo L, et al. 2014. Science 346:1256688
New.ReferenceOTU200	11.0	78	Fungi	Ascomycota	Pathotroph	Animal Pathogen	Probable	NULL	NULL	NULL	Tedersoo L, et al. 2014. Science 346:1256688
SH216250.07FU_EF679363_refs	24.0	89	Fungi	Ascomycota	Pathotroph	Plant Pathogen	Probable	Microfungus	NULL	NULL	Tedersoo L, et al. 2014. Science 346:1256688
New.CleanUp.ReferenceOTU9171	0.0	1	Fungi	Basidiomycota	Pathotroph-Saprotroph	Dung Saprotroph-Plant Parasite-Soil Saprotroph-Undefined Saprotroph-Wood Saprotroph	Probable	Agaricoid	NULL	Very variable ecology	Pholiota species are lignicolous and can act as weak parasites while most other taxa are either sparobes in grassy habitats or are found in dung. Species are not ectomycorrhizal (Cannon & Kirk 2007)	Cannon PF, Kirk PM. 2007. Fungal Families of the World. CAB International, Cambridge
New.CleanUp.ReferenceOTU6760	11.0	1	Fungi	Ascomycota	Pathotroph-Saprotroph	Fungal Parasite-Plant Pathogen-Plant Saprotroph	Probable	Microfungus	NULL	Necrotrophic or saprobic on a wide range of plants, especially monocotyledons	a few species parasitic on other fungi (Cannon & Kirk 2007)	Cannon PF, Kirk PM. 2007. Fungal Families of the World. CAB International, Cambridge
New.CleanUp.ReferenceOTU5675	0.0	1	Fungi	Ascomycota	Pathotroph-Saprotroph	Plant Pathogen-Undefined Saprotroph	Probable	Microfungus	NULL	Biotrophic, necrotrophic or saprobic on various plant tissues (Cannon & Kirk 2007)	Cannon PF, Kirk PM. 2007. Fungal Families of the World. CAB International, Cambridge
New.CleanUp.ReferenceOTU1925	0.0	1	Fungi	Basidiomycota	Pathotroph-Saprotroph	Fungal Parasite-Litter Saprotroph	Probable	Yeast	NULL	NULL	Tedersoo L, et al. 2014. Science 346:1256688	Nagy GL, et al. 2014. Nature Communications 5:4471	Purahong W, et al. 2016. Molecular Ecology 25:4059-4074
New.CleanUp.ReferenceOTU6355	2.0	10	Fungi	Basidiomycota	Pathotroph-Saprotroph	Animal Endosymbiont-Animal Pathogen-Endophyte-Plant Pathogen-Undefined Saprotroph	Probable	Yeast	NULL	Opportunistic human pathogen	http://www.cdc.gov
New.CleanUp.ReferenceOTU6850	8.0	14	Fungi	Ascomycota	Pathotroph-Saprotroph	Animal Pathogen-Undefined Saprotroph	Probable	Facultative Yeast	NULL	NULL	Tedersoo L, et al. 2014. Science 346:1256688, Nagy GL, et al. 2014. Nature Communications 5:4471
New.ReferenceOTU49	18.0	2	Fungi	Ascomycota	Pathotroph-Saprotroph	Animal Pathogen-Plant Pathogen-Undefined Saprotroph	Possible	Microfungus	NULL	NULL	Tedersoo L, et al. 2014. Science 346:1256688 (doi:10.1126/science.1256688)
New.ReferenceOTU30	0.0	3	Fungi	Ascomycota	Pathotroph-Saprotroph	NULL	Probable	Facultative Yeast-Microfungus	NULL	NULL	Kurtzman CP, et al. (eds.) 2011. The Yeasts, a Taxonomic Study. Fifth Edition. Vols 1-3. Elsevier, San Diego
New.CleanUp.ReferenceOTU4552	8.0	38	Fungi	Ascomycota	Pathotroph-Saprotroph	Endophyte-Lichen Parasite-Plant Pathogen-Undefined Saprotroph	Probable	Microfungus	NULL	Necrotrophic pathogens and saprobes, especially associated with grasses. Many species are seed-borne (Cannon & Kirk 2007)	Cannon PF, Kirk PM. 2007. Fungal Families of the World. CAB International, Cambridge	David AS, et al. 2016. Microbial Ecology 71:912-926	Lawrey JD, Diederich P. 2016. URL: http://www.lichenicolous.net [24 May 2017]
New.CleanUp.ReferenceOTU1730	1.0	4	Fungi	Ascomycota	Pathotroph-Saprotroph	Fungal Parasite-Plant Pathogen-Plant Saprotroph	Probable	Microfungus	NULL	Necrotrophic or saprobic on a wide range of plants, especially monocotyledons	a few species parasitic on other fungi (Cannon & Kirk 2007)	Cannon PF, Kirk PM. 2007. Fungal Families of the World. CAB International, Cambridge
New.CleanUp.ReferenceOTU3026	3.0	4	Fungi	Ascomycota	Pathotroph-Saprotroph	Animal Pathogen-Plant Pathogen-Undefined Saprotroph	Possible	Microfungus	NULL	NULL	Tedersoo L, et al. 2014. Science 346:1256688 (doi:10.1126/science.1256688)
New.CleanUp.ReferenceOTU3161	7.0	1	Fungi	Basidiomycota	Pathotroph-Saprotroph-Symbiotroph	Ectomycorrhizal-Fungal Parasite-Soil Saprotroph-Undefined Saprotroph	Possible	Agaricoid	NULL	NULL	Rinaldi AC, et al. 2008. Fungal Diversity 33:1-45 (ECM/(not ECM)	Tedersoo L, et al. 2010. Mycorrhiza 20:217-263 (sensu stricto)	http://mycorrhizas.info/ecmf.html (ECM/(not ECM)
New.CleanUp.ReferenceOTU16822	0.0	1	Fungi	Ascomycota	Pathotroph-Saprotroph-Symbiotroph	Animal Pathogen-Soil Saprotroph	Possible	NULL	NULL	It is important to note that the majority of species that comprise this genus, including the White-Nose Bat Syndrome causing Pseudogymnoascus destructans, were once placed in the genus Geomyces (see Minnis & Lindner 2013),and including Pseudogymnoascus panorum (as Geomyces panorum) that had been widely applied to a number of isolates from cold places, including those found in soil, on living root…	however, the true identity of Geomyces panorum (now Pseudogymnoascus panorum) is not known (pers.Lindner DL)	Minnis AM, Lindner DL. 2013. Fungal Biology 117:638-649	Tedersoo L, et al. 2014. Science 346:1256688
New.CleanUp.ReferenceOTU9692	0.0	1	Fungi	Ascomycota	Pathotroph-Saprotroph-Symbiotroph	Animal Pathogen-Soil Saprotroph	Possible	NULL	NULL	It is important to note that the majority of species that comprise this genus, including the White-Nose Bat Syndrome causing Pseudogymnoascus destructans, were once placed in the genus Geomyces (see Minnis & Lindner 2013),and including Pseudogymnoascus panorum (as Geomyces panorum) that had been widely applied to a number of isolates from cold places, including those found in soil, on living root…	however, the true identity of Geomyces panorum (now Pseudogymnoascus panorum) is not known (pers.Lindner DL)	Minnis AM, Lindner DL. 2013. Fungal Biology 117:638-649	Tedersoo L, et al. 2014. Science 346:1256688
New.CleanUp.ReferenceOTU3487	10.0	1	Fungi	Ascomycota	Pathotroph-Saprotroph-Symbiotroph	Animal Pathogen-Endophyte-Plant Saprotroph-Soil Saprotroph	Probable	NULL	NULL	Endophyte detection method-culture (Dik et al. 1998)	The fungal genus Sporothrix comprises a group of thermodimorphic pathogens that cause skin infections in humans and other mammals. Rose gardener’s disease (Sporotrichosis) occurs worldwide, with hyperendemic areas in Brazil, China, and South Africa (Rodrigues et al. 2016)	The fungus lives throughout the world in soil and on plant matter such as sphagnum moss, rose bushes, and hay (www.cdc.gov)	Dik AJ, et al. 1998. European Journal of Plant Pathology 104:413-423	Rodrigues AM, et al. 2016. PLoS Pathogens 12:e1005638	https://www.cdc.gov
New.CleanUp.ReferenceOTU2570	2.0	1	Fungi	Ascomycota	Pathotroph-Saprotroph-Symbiotroph	Animal Pathogen-Dung Saprotroph-Endophyte-Epiphyte-Plant Saprotroph-Wood Saprotroph	Possible	Microfungus	Soft Rot	Saprobic, acting as key decay organisms of plant materials and plant-derived commodities (Cannon & Kirk 2007)	Epiphyte detection method-culture (Massimo et al. 2015)	Endophyte detection method-culture (Busby et al. 2016, David et al. 2016)	Likely opportunistic human pathogen (Irinyi et al. 2015)	Seehann G, et al. 1975. List of Fungi in Soft-Rot Tissue Tests. Institute fur Holzbiologie und Holzschutz, Bundesforschungsanstalt fur Forst - und Holzwirtshaft, Hamburg - Lohbrugge, Germany	Cannon PF, Kirk PM. 2007. Fungal Families of the World. CAB International, Cambridge	Bills GF, et al. 2013. Current Opinion in microbiology, 16:549-565	Tedersoo L, et al. 2014. Science 346:1256688	Irinyi L, et al. 2015. Medical Mycology 53:313-337	Massimo NC, et al. 2015. Microbial Ecology 70:61-76	Busby PE, et al. 2016. New Phytologist 209:1681-1692	David AS, et al. 2016. Microbial Ecology 71:912-926
New.CleanUp.ReferenceOTU945	1.0	1	Fungi	Ascomycota	Pathotroph-Saprotroph-Symbiotroph	Animal Pathogen-Endophyte-Plant Saprotroph-Soil Saprotroph	Probable	NULL	NULL	Endophyte detection method-culture (Dik et al. 1998)	The fungal genus Sporothrix comprises a group of thermodimorphic pathogens that cause skin infections in humans and other mammals. Rose gardener’s disease (Sporotrichosis) occurs worldwide, with hyperendemic areas in Brazil, China, and South Africa (Rodrigues et al. 2016)	The fungus lives throughout the world in soil and on plant matter such as sphagnum moss, rose bushes, and hay (www.cdc.gov)	Dik AJ, et al. 1998. European Journal of Plant Pathology 104:413-423	Rodrigues AM, et al. 2016. PLoS Pathogens 12:e1005638	https://www.cdc.gov
New.CleanUp.ReferenceOTU10245	0.0	1	Fungi	Ascomycota	Pathotroph-Saprotroph-Symbiotroph	Animal Pathogen-Dung Saprotroph-Endophyte-Epiphyte-Plant Saprotroph-Wood Saprotroph	Possible	Microfungus	Soft Rot	Saprobic, acting as key decay organisms of plant materials and plant-derived commodities (Cannon & Kirk 2007)	Epiphyte detection method-culture (Massimo et al. 2015)	Endophyte detection method-culture (Busby et al. 2016, David et al. 2016)	Likely opportunistic human pathogen (Irinyi et al. 2015)	Seehann G, et al. 1975. List of Fungi in Soft-Rot Tissue Tests. Institute fur Holzbiologie und Holzschutz, Bundesforschungsanstalt fur Forst - und Holzwirtshaft, Hamburg - Lohbrugge, Germany	Cannon PF, Kirk PM. 2007. Fungal Families of the World. CAB International, Cambridge	Bills GF, et al. 2013. Current Opinion in microbiology, 16:549-565	Tedersoo L, et al. 2014. Science 346:1256688	Irinyi L, et al. 2015. Medical Mycology 53:313-337	Massimo NC, et al. 2015. Microbial Ecology 70:61-76	Busby PE, et al. 2016. New Phytologist 209:1681-1692	David AS, et al. 2016. Microbial Ecology 71:912-926
New.CleanUp.ReferenceOTU17130	0.0	1	Fungi	Basidiomycota	Pathotroph-Saprotroph-Symbiotroph	Fungal Parasite-Undefined Saprotroph	Possible	Tremelloid-Yeast	NULL	The order contains both teleomorphic and anamorphic species, most of the latter being yeasts	Sterkenburg E, et al. 2015. New Phytologist 207:1145-1158
New.CleanUp.ReferenceOTU3430	0.0	1	Fungi	Basidiomycota	Pathotroph-Saprotroph-Symbiotroph	Fungal Parasite-Undefined Saprotroph	Possible	Tremelloid-Yeast	NULL	The order contains both teleomorphic and anamorphic species, most of the latter being yeasts	Sterkenburg E, et al. 2015. New Phytologist 207:1145-1158
New.CleanUp.ReferenceOTU8914	0.0	1	Fungi	Basidiomycota	Pathotroph-Saprotroph-Symbiotroph	Fungal Parasite-Undefined Saprotroph	Possible	Tremelloid-Yeast	NULL	The order contains both teleomorphic and anamorphic species, most of the latter being yeasts	Sterkenburg E, et al. 2015. New Phytologist 207:1145-1158
New.ReferenceOTU21	7.0	1	Fungi	Zygomycota	Pathotroph-Saprotroph-Symbiotroph	Animal Endosymbiont-Animal Pathogen-Undefined Saprotroph	Probable	Microfungus	NULL	Basidiobolus ranarum is commonly present in decaying fruit and vegetable matter, and as a commensal in the intestinal tract of frogs, toads, and lizards - Cause of subcutaneous zygomycosis in humans (Cannon & Kirk 2007)	Cannon PF, Kirk PM. 2007. Fungal Families of the World. CAB International, Cambridge
New.CleanUp.ReferenceOTU7400	0.0	1	Fungi	Zygomycota	Pathotroph-Saprotroph-Symbiotroph	Animal Endosymbiont-Animal Pathogen-Undefined Saprotroph	Probable	Microfungus	NULL	Basidiobolus ranarum is commonly present in decaying fruit and vegetable matter, and as a commensal in the intestinal tract of frogs, toads, and lizards - Cause of subcutaneous zygomycosis in humans (Cannon & Kirk 2007)	Cannon PF, Kirk PM. 2007. Fungal Families of the World. CAB International, Cambridge
New.CleanUp.ReferenceOTU17395	0.0	10	Fungi	Basidiomycota	Pathotroph-Saprotroph-Symbiotroph	Fungal Parasite-Undefined Saprotroph	Possible	Tremelloid-Yeast	NULL	The order contains both teleomorphic and anamorphic species, most of the latter being yeasts	Sterkenburg E, et al. 2015. New Phytologist 207:1145-1158
New.CleanUp.ReferenceOTU10689	6.0	11	Fungi	Ascomycota	Pathotroph-Saprotroph-Symbiotroph	Animal Pathogen-Dung Saprotroph-Endophyte-Epiphyte-Plant Saprotroph-Wood Saprotroph	Possible	Microfungus	Soft Rot	Saprobic, acting as key decay organisms of plant materials and plant-derived commodities (Cannon & Kirk 2007)	Epiphyte detection method-culture (Massimo et al. 2015)	Endophyte detection method-culture (Busby et al. 2016, David et al. 2016)	Likely opportunistic human pathogen (Irinyi et al. 2015)	Seehann G, et al. 1975. List of Fungi in Soft-Rot Tissue Tests. Institute fur Holzbiologie und Holzschutz, Bundesforschungsanstalt fur Forst - und Holzwirtshaft, Hamburg - Lohbrugge, Germany	Cannon PF, Kirk PM. 2007. Fungal Families of the World. CAB International, Cambridge	Bills GF, et al. 2013. Current Opinion in microbiology, 16:549-565	Tedersoo L, et al. 2014. Science 346:1256688	Irinyi L, et al. 2015. Medical Mycology 53:313-337	Massimo NC, et al. 2015. Microbial Ecology 70:61-76	Busby PE, et al. 2016. New Phytologist 209:1681-1692	David AS, et al. 2016. Microbial Ecology 71:912-926
New.CleanUp.ReferenceOTU5260	117.0	110	Fungi	Ascomycota	Pathotroph-Saprotroph-Symbiotroph	Animal Pathogen-Endophyte-Lichen Parasite-Plant Pathogen-Soil Saprotroph-Wood Saprotroph	Possible	Microfungus	NULL	Likely opportunistic human pathogen (Irinyi et al. 2015)	Duncan CG, Eslyn WE. 1966. Mycologia 58:642-664	Seehann G, et al. 1975. List of Fungi in Soft-Rot Tissue Tests. Institute fur Holzbiologie und Holzschutz, Bundesforschungsanstalt fur Forst - und Holzwirtshaft, Hamburg - Lohbrugge, Germany	Costa IPMW, et al. 2012. Mycotaxon 119:26	Tedersoo L, et al. 2014. Science 346:1256688	Irinyi L, et al. 2015. Medical Mycology 53:313-337	Schroers et al. 2016. Mycologia 108:806-819	http://www.apsnet.org/publications/commonnames/Pages/default.aspx	Lawrey JD, Diederich P. 2016. URL: http://www.lichenicolous.net [24 May 2017]
New.CleanUp.ReferenceOTU5112	46.0	115	Fungi	Ascomycota	Pathotroph-Saprotroph-Symbiotroph	Animal Pathogen-Dung Saprotroph-Endophyte-Plant Saprotroph-Soil Saprotroph-Wood Saprotroph	Probable	Microfungus	Soft Rot	Reported in soils (including agricultural) as saprotrophs on dung or plant material, or in roots as endophytes, while some species are associated with human and animal opportunistic diseases (Carmaran et al.2015)	Seehann G, et al. 1975. List of Fungi in Soft-Rot Tissue Tests. Institute fur Holzbiologie und Holzschutz, Bundesforschungsanstalt fur Forst - und Holzwirtshaft, Hamburg - Lohbrugge, Germany	Carmaran CC, et al.2015. Mycological Progress 14:94	Irinyi L, et al. 2015. Medical Mycology 53:313-337
New.ReferenceOTU23	56.0	146	Fungi	Ascomycota	Pathotroph-Saprotroph-Symbiotroph	Animal Pathogen-Endophyte-Lichen Parasite-Plant Pathogen-Soil Saprotroph-Wood Saprotroph	Possible	Microfungus	NULL	Likely opportunistic human pathogen (Irinyi et al. 2015)	Duncan CG, Eslyn WE. 1966. Mycologia 58:642-664	Seehann G, et al. 1975. List of Fungi in Soft-Rot Tissue Tests. Institute fur Holzbiologie und Holzschutz, Bundesforschungsanstalt fur Forst - und Holzwirtshaft, Hamburg - Lohbrugge, Germany	Costa IPMW, et al. 2012. Mycotaxon 119:26	Tedersoo L, et al. 2014. Science 346:1256688	Irinyi L, et al. 2015. Medical Mycology 53:313-337	Schroers et al. 2016. Mycologia 108:806-819	http://www.apsnet.org/publications/commonnames/Pages/default.aspx	Lawrey JD, Diederich P. 2016. URL: http://www.lichenicolous.net [24 May 2017]
New.CleanUp.ReferenceOTU3412	5.0	17	Fungi	Ascomycota	Pathotroph-Saprotroph-Symbiotroph	Animal Pathogen-Dung Saprotroph-Endophyte-Epiphyte-Plant Saprotroph-Wood Saprotroph	Possible	Microfungus	Soft Rot	Saprobic, acting as key decay organisms of plant materials and plant-derived commodities (Cannon & Kirk 2007)	Epiphyte detection method-culture (Massimo et al. 2015)	Endophyte detection method-culture (Busby et al. 2016, David et al. 2016)	Likely opportunistic human pathogen (Irinyi et al. 2015)	Seehann G, et al. 1975. List of Fungi in Soft-Rot Tissue Tests. Institute fur Holzbiologie und Holzschutz, Bundesforschungsanstalt fur Forst - und Holzwirtshaft, Hamburg - Lohbrugge, Germany	Cannon PF, Kirk PM. 2007. Fungal Families of the World. CAB International, Cambridge	Bills GF, et al. 2013. Current Opinion in microbiology, 16:549-565	Tedersoo L, et al. 2014. Science 346:1256688	Irinyi L, et al. 2015. Medical Mycology 53:313-337	Massimo NC, et al. 2015. Microbial Ecology 70:61-76	Busby PE, et al. 2016. New Phytologist 209:1681-1692	David AS, et al. 2016. Microbial Ecology 71:912-926
New.CleanUp.ReferenceOTU891	0.0	185	Fungi	Zygomycota	Pathotroph-Saprotroph-Symbiotroph	Animal Endosymbiont-Animal Pathogen-Undefined Saprotroph	Probable	Microfungus	NULL	Basidiobolus ranarum is commonly present in decaying fruit and vegetable matter, and as a commensal in the intestinal tract of frogs, toads, and lizards - Cause of subcutaneous zygomycosis in humans (Cannon & Kirk 2007)	Cannon PF, Kirk PM. 2007. Fungal Families of the World. CAB International, Cambridge
New.CleanUp.ReferenceOTU17620	0.0	2	Fungi	Basidiomycota	Pathotroph-Saprotroph-Symbiotroph	Endomycorrhizal-Plant Pathogen-Undefined Saprotroph	Possible	Microfungus	NULL	Best known as plant pathogens, but also saprobic. Species are endomycorrhizal with a wide range of plant roots - especially of Orchidaceae but also even bryophytes (Cannon & Kirk 2007)	Cannon PF, Kirk PM. 2007. Fungal Families of the World. CAB International, Cambridge
New.CleanUp.ReferenceOTU16301	0.0	2	Fungi	Ascomycota	Pathotroph-Saprotroph-Symbiotroph	Animal Pathogen-Endophyte-Plant Pathogen-Wood Saprotroph	Possible	Microfungus	Soft Rot	NULL	Duncan CG, Eslyn WE. 1966. Mycologia 58:642-664	Seehann G, et al. 1975. List of Fungi in Soft-Rot Tissue Tests. Institute fur Holzbiologie und Holzschutz, Bundesforschungsanstalt fur Forst - und Holzwirtshaft, Hamburg - Lohbrugge, Germany	Tedersoo L, et al. 2014. Science 346:125688
New.CleanUp.ReferenceOTU14462	3.0	2	Fungi	Ascomycota	Pathotroph-Saprotroph-Symbiotroph	Animal Pathogen-Soil Saprotroph	Possible	NULL	NULL	It is important to note that the majority of species that comprise this genus, including the White-Nose Bat Syndrome causing Pseudogymnoascus destructans, were once placed in the genus Geomyces (see Minnis & Lindner 2013),and including Pseudogymnoascus panorum (as Geomyces panorum) that had been widely applied to a number of isolates from cold places, including those found in soil, on living root…	however, the true identity of Geomyces panorum (now Pseudogymnoascus panorum) is not known (pers.Lindner DL)	Minnis AM, Lindner DL. 2013. Fungal Biology 117:638-649	Tedersoo L, et al. 2014. Science 346:1256688
New.CleanUp.ReferenceOTU5712	0.0	2	Fungi	Ascomycota	Pathotroph-Saprotroph-Symbiotroph	Endophyte-Plant Pathogen-Wood Saprotroph	Probable	NULL	Soft Rot	NULL	Duncan CG, Eslyn WE. 1966. Mycologia 58:642-645	Tedersoo L, et al. 2014. Science 346:1256688
New.CleanUp.ReferenceOTU333	0.0	2	Fungi	Ascomycota	Pathotroph-Saprotroph-Symbiotroph	Animal Pathogen-Dung Saprotroph-Endophyte-Epiphyte-Plant Saprotroph-Wood Saprotroph	Possible	Microfungus	Soft Rot	Saprobic, acting as key decay organisms of plant materials and plant-derived commodities (Cannon & Kirk 2007)	Epiphyte detection method-culture (Massimo et al. 2015)	Endophyte detection method-culture (Busby et al. 2016, David et al. 2016)	Likely opportunistic human pathogen (Irinyi et al. 2015)	Seehann G, et al. 1975. List of Fungi in Soft-Rot Tissue Tests. Institute fur Holzbiologie und Holzschutz, Bundesforschungsanstalt fur Forst - und Holzwirtshaft, Hamburg - Lohbrugge, Germany	Cannon PF, Kirk PM. 2007. Fungal Families of the World. CAB International, Cambridge	Bills GF, et al. 2013. Current Opinion in microbiology, 16:549-565	Tedersoo L, et al. 2014. Science 346:1256688	Irinyi L, et al. 2015. Medical Mycology 53:313-337	Massimo NC, et al. 2015. Microbial Ecology 70:61-76	Busby PE, et al. 2016. New Phytologist 209:1681-1692	David AS, et al. 2016. Microbial Ecology 71:912-926
New.CleanUp.ReferenceOTU15849	1.0	2	Fungi	Ascomycota	Pathotroph-Saprotroph-Symbiotroph	Animal Pathogen-Dung Saprotroph-Endophyte-Lichen Parasite-Plant Pathogen-Undefined Saprotroph	Possible	Microfungus	NULL	Common Name - Rust Fungus	Saprobic on wood and bark (especially in dry habitats), coprophilous or isolated from soil and similar substrata (Cannon & Kirk 2007)	Cannon PF, Kirk PM. 2007. Fungal Families of the World. CAB International, Cambridge	Damm U, et al. 2010. Persoonia 24:60-80	Irinyi L, et al. 2015. Medical Mycology 53:313-337	Lawrey JD, Diederich P. 2016. URL: http://www.lichenicolous.net [24 May 2017]
New.CleanUp.ReferenceOTU1158	0.0	2	Fungi	Ascomycota	Pathotroph-Saprotroph-Symbiotroph	Animal Pathogen-Endophyte-Plant Pathogen-Undefined Saprotroph	Possible	Microfungus	NULL	Saprobic in soil or rotting vegetation, some species heat-tolerant and associatated with silage and compost, a few associated with humans and animals (Cannon & Kirk 2007)	Cannon PF, Kirk PM. 2007. Fungal Families of the World. CAB International, Cambridge
New.CleanUp.ReferenceOTU10731	9.0	2	Fungi	Ascomycota	Pathotroph-Saprotroph-Symbiotroph	Animal Pathogen-Endophyte-Plant Pathogen-Undefined Saprotroph	Possible	Microfungus	NULL	Saprobic in soil or rotting vegetation, some species heat-tolerant and associatated with silage and compost, a few associated with humans and animals (Cannon & Kirk 2007)	Cannon PF, Kirk PM. 2007. Fungal Families of the World. CAB International, Cambridge
New.CleanUp.ReferenceOTU2061	0.0	2	Fungi	Basidiomycota	Pathotroph-Saprotroph-Symbiotroph	Fungal Parasite-Undefined Saprotroph	Possible	Tremelloid-Yeast	NULL	The order contains both teleomorphic and anamorphic species, most of the latter being yeasts	Sterkenburg E, et al. 2015. New Phytologist 207:1145-1158
New.CleanUp.ReferenceOTU4518	1.0	2	Fungi	Basidiomycota	Pathotroph-Saprotroph-Symbiotroph	Fungal Parasite-Undefined Saprotroph	Possible	Tremelloid-Yeast	NULL	The order contains both teleomorphic and anamorphic species, most of the latter being yeasts	Sterkenburg E, et al. 2015. New Phytologist 207:1145-1158
New.CleanUp.ReferenceOTU11960	3.0	20	Fungi	Ascomycota	Pathotroph-Saprotroph-Symbiotroph	Animal Pathogen-Endophyte-Plant Pathogen-Wood Saprotroph	Possible	Microfungus	Soft Rot	NULL	Duncan CG, Eslyn WE. 1966. Mycologia 58:642-664	Seehann G, et al. 1975. List of Fungi in Soft-Rot Tissue Tests. Institute fur Holzbiologie und Holzschutz, Bundesforschungsanstalt fur Forst - und Holzwirtshaft, Hamburg - Lohbrugge, Germany	Tedersoo L, et al. 2014. Science 346:125688
New.CleanUp.ReferenceOTU632	36.0	28	Fungi	Ascomycota	Pathotroph-Saprotroph-Symbiotroph	Animal Pathogen-Dung Saprotroph-Endophyte-Plant Saprotroph-Soil Saprotroph-Wood Saprotroph	Probable	Microfungus	Soft Rot	Reported in soils (including agricultural) as saprotrophs on dung or plant material, or in roots as endophytes, while some species are associated with human and animal opportunistic diseases (Carmaran et al.2015)	Seehann G, et al. 1975. List of Fungi in Soft-Rot Tissue Tests. Institute fur Holzbiologie und Holzschutz, Bundesforschungsanstalt fur Forst - und Holzwirtshaft, Hamburg - Lohbrugge, Germany	Carmaran CC, et al.2015. Mycological Progress 14:94	Irinyi L, et al. 2015. Medical Mycology 53:313-337
SH204422.07FU_KF528003_reps	518.0	282	Fungi	Ascomycota	Pathotroph-Saprotroph-Symbiotroph	Animal Pathogen-Endophyte-Lichen Parasite-Plant Pathogen-Soil Saprotroph-Wood Saprotroph	Possible	Microfungus	NULL	Likely opportunistic human pathogen (Irinyi et al. 2015)	Duncan CG, Eslyn WE. 1966. Mycologia 58:642-664	Seehann G, et al. 1975. List of Fungi in Soft-Rot Tissue Tests. Institute fur Holzbiologie und Holzschutz, Bundesforschungsanstalt fur Forst - und Holzwirtshaft, Hamburg - Lohbrugge, Germany	Costa IPMW, et al. 2012. Mycotaxon 119:26	Tedersoo L, et al. 2014. Science 346:1256688	Irinyi L, et al. 2015. Medical Mycology 53:313-337	Schroers et al. 2016. Mycologia 108:806-819	http://www.apsnet.org/publications/commonnames/Pages/default.aspx	Lawrey JD, Diederich P. 2016. URL: http://www.lichenicolous.net [24 May 2017]
New.CleanUp.ReferenceOTU10920	0.0	3	Fungi	Ascomycota	Pathotroph-Saprotroph-Symbiotroph	Animal Pathogen-Soil Saprotroph	Possible	NULL	NULL	It is important to note that the majority of species that comprise this genus, including the White-Nose Bat Syndrome causing Pseudogymnoascus destructans, were once placed in the genus Geomyces (see Minnis & Lindner 2013),and including Pseudogymnoascus panorum (as Geomyces panorum) that had been widely applied to a number of isolates from cold places, including those found in soil, on living root…	however, the true identity of Geomyces panorum (now Pseudogymnoascus panorum) is not known (pers.Lindner DL)	Minnis AM, Lindner DL. 2013. Fungal Biology 117:638-649	Tedersoo L, et al. 2014. Science 346:1256688
New.ReferenceOTU180	109.0	3	Fungi	Ascomycota	Pathotroph-Saprotroph-Symbiotroph	Animal Pathogen-Dung Saprotroph-Endophyte-Lichen Parasite-Plant Pathogen-Undefined Saprotroph	Possible	Microfungus	NULL	NULL	Bell A. 1983. Dung Fungi: An Illustrated Guide to Coprophilous Fungi in New Zealand. Victoria University Press, Wellington	Damm U, et al. 2010. Persoonia 24:60-80	Costa IPMW, et al. 2012. Mycotaxon 119:26	Tedersoo L, et al. 2014. Science 346:1256688 (doi:10.1126/science.1256688)	Irinyi L, et al. 2015. Medical Mycology 53:313-337	Lawrey JD, Diederich P. 2016. URL: http://www.lichenicolous.net [24 May 2017]
New.CleanUp.ReferenceOTU4352	28.0	3	Fungi	Ascomycota	Pathotroph-Saprotroph-Symbiotroph	Animal Pathogen-Dung Saprotroph-Endophyte-Epiphyte-Plant Saprotroph-Wood Saprotroph	Possible	Microfungus	Soft Rot	Saprobic, acting as key decay organisms of plant materials and plant-derived commodities (Cannon & Kirk 2007)	Epiphyte detection method-culture (Massimo et al. 2015)	Endophyte detection method-culture (Busby et al. 2016, David et al. 2016)	Likely opportunistic human pathogen (Irinyi et al. 2015)	Seehann G, et al. 1975. List of Fungi in Soft-Rot Tissue Tests. Institute fur Holzbiologie und Holzschutz, Bundesforschungsanstalt fur Forst - und Holzwirtshaft, Hamburg - Lohbrugge, Germany	Cannon PF, Kirk PM. 2007. Fungal Families of the World. CAB International, Cambridge	Bills GF, et al. 2013. Current Opinion in microbiology, 16:549-565	Tedersoo L, et al. 2014. Science 346:1256688	Irinyi L, et al. 2015. Medical Mycology 53:313-337	Massimo NC, et al. 2015. Microbial Ecology 70:61-76	Busby PE, et al. 2016. New Phytologist 209:1681-1692	David AS, et al. 2016. Microbial Ecology 71:912-926
New.CleanUp.ReferenceOTU2615	0.0	3	Fungi	Ascomycota	Pathotroph-Saprotroph-Symbiotroph	Animal Pathogen-Endophyte-Lichen Parasite-Plant Pathogen-Soil Saprotroph-Wood Saprotroph	Possible	Microfungus	NULL	Likely opportunistic human pathogen (Irinyi et al. 2015)	Duncan CG, Eslyn WE. 1966. Mycologia 58:642-664	Seehann G, et al. 1975. List of Fungi in Soft-Rot Tissue Tests. Institute fur Holzbiologie und Holzschutz, Bundesforschungsanstalt fur Forst - und Holzwirtshaft, Hamburg - Lohbrugge, Germany	Costa IPMW, et al. 2012. Mycotaxon 119:26	Tedersoo L, et al. 2014. Science 346:1256688	Irinyi L, et al. 2015. Medical Mycology 53:313-337	Schroers et al. 2016. Mycologia 108:806-819	http://www.apsnet.org/publications/commonnames/Pages/default.aspx	Lawrey JD, Diederich P. 2016. URL: http://www.lichenicolous.net [24 May 2017]
New.CleanUp.ReferenceOTU4126	1.0	3	Fungi	Ascomycota	Pathotroph-Saprotroph-Symbiotroph	Animal Pathogen-Endophyte-Lichen Parasite-Plant Pathogen-Soil Saprotroph-Wood Saprotroph	Possible	Microfungus	NULL	Likely opportunistic human pathogen (Irinyi et al. 2015)	Duncan CG, Eslyn WE. 1966. Mycologia 58:642-664	Seehann G, et al. 1975. List of Fungi in Soft-Rot Tissue Tests. Institute fur Holzbiologie und Holzschutz, Bundesforschungsanstalt fur Forst - und Holzwirtshaft, Hamburg - Lohbrugge, Germany	Costa IPMW, et al. 2012. Mycotaxon 119:26	Tedersoo L, et al. 2014. Science 346:1256688	Irinyi L, et al. 2015. Medical Mycology 53:313-337	Schroers et al. 2016. Mycologia 108:806-819	http://www.apsnet.org/publications/commonnames/Pages/default.aspx	Lawrey JD, Diederich P. 2016. URL: http://www.lichenicolous.net [24 May 2017]
New.CleanUp.ReferenceOTU16315	0.0	3	Fungi	Basidiomycota	Pathotroph-Saprotroph-Symbiotroph	Fungal Parasite-Undefined Saprotroph	Possible	Tremelloid-Yeast	NULL	The order contains both teleomorphic and anamorphic species, most of the latter being yeasts	Sterkenburg E, et al. 2015. New Phytologist 207:1145-1158
New.CleanUp.ReferenceOTU6758	4.0	4	Fungi	Ascomycota	Pathotroph-Saprotroph-Symbiotroph	Animal Pathogen-Endophyte-Lichen Parasite-Plant Pathogen-Soil Saprotroph-Wood Saprotroph	Possible	Microfungus	NULL	Likely opportunistic human pathogen (Irinyi et al. 2015)	Duncan CG, Eslyn WE. 1966. Mycologia 58:642-664	Seehann G, et al. 1975. List of Fungi in Soft-Rot Tissue Tests. Institute fur Holzbiologie und Holzschutz, Bundesforschungsanstalt fur Forst - und Holzwirtshaft, Hamburg - Lohbrugge, Germany	Costa IPMW, et al. 2012. Mycotaxon 119:26	Tedersoo L, et al. 2014. Science 346:1256688	Irinyi L, et al. 2015. Medical Mycology 53:313-337	Schroers et al. 2016. Mycologia 108:806-819	http://www.apsnet.org/publications/commonnames/Pages/default.aspx	Lawrey JD, Diederich P. 2016. URL: http://www.lichenicolous.net [24 May 2017]
New.CleanUp.ReferenceOTU281	2.0	4	Fungi	Basidiomycota	Pathotroph-Saprotroph-Symbiotroph	Fungal Parasite-Undefined Saprotroph	Possible	Tremelloid-Yeast	NULL	The order contains both teleomorphic and anamorphic species, most of the latter being yeasts	Sterkenburg E, et al. 2015. New Phytologist 207:1145-1158
New.CleanUp.ReferenceOTU4880	0.0	4	Fungi	Basidiomycota	Pathotroph-Saprotroph-Symbiotroph	Fungal Parasite-Undefined Saprotroph	Possible	Tremelloid-Yeast	NULL	The order contains both teleomorphic and anamorphic species, most of the latter being yeasts	Sterkenburg E, et al. 2015. New Phytologist 207:1145-1158
New.ReferenceOTU40	0.0	4	Fungi	Zygomycota	Pathotroph-Saprotroph-Symbiotroph	Animal Endosymbiont-Animal Pathogen-Undefined Saprotroph	Probable	Microfungus	NULL	Basidiobolus ranarum is commonly present in decaying fruit and vegetable matter, and as a commensal in the intestinal tract of frogs, toads, and lizards - Cause of subcutaneous zygomycosis in humans (Cannon & Kirk 2007)	Cannon PF, Kirk PM. 2007. Fungal Families of the World. CAB International, Cambridge
New.ReferenceOTU227	116.0	456	Fungi	Ascomycota	Pathotroph-Saprotroph-Symbiotroph	Animal Pathogen-Dung Saprotroph-Endophyte-Epiphyte-Plant Saprotroph-Wood Saprotroph	Possible	Microfungus	Soft Rot	Saprobic, acting as key decay organisms of plant materials and plant-derived commodities (Cannon & Kirk 2007)	Epiphyte detection method-culture (Massimo et al. 2015)	Endophyte detection method-culture (Busby et al. 2016, David et al. 2016)	Likely opportunistic human pathogen (Irinyi et al. 2015)	Seehann G, et al. 1975. List of Fungi in Soft-Rot Tissue Tests. Institute fur Holzbiologie und Holzschutz, Bundesforschungsanstalt fur Forst - und Holzwirtshaft, Hamburg - Lohbrugge, Germany	Cannon PF, Kirk PM. 2007. Fungal Families of the World. CAB International, Cambridge	Bills GF, et al. 2013. Current Opinion in microbiology, 16:549-565	Tedersoo L, et al. 2014. Science 346:1256688	Irinyi L, et al. 2015. Medical Mycology 53:313-337	Massimo NC, et al. 2015. Microbial Ecology 70:61-76	Busby PE, et al. 2016. New Phytologist 209:1681-1692	David AS, et al. 2016. Microbial Ecology 71:912-926
New.CleanUp.ReferenceOTU16335	0.0	5	Fungi	Ascomycota	Pathotroph-Saprotroph-Symbiotroph	Animal Pathogen-Dung Saprotroph-Endophyte-Epiphyte-Plant Saprotroph-Wood Saprotroph	Possible	Microfungus	Soft Rot	Saprobic, acting as key decay organisms of plant materials and plant-derived commodities (Cannon & Kirk 2007)	Epiphyte detection method-culture (Massimo et al. 2015)	Endophyte detection method-culture (Busby et al. 2016, David et al. 2016)	Likely opportunistic human pathogen (Irinyi et al. 2015)	Seehann G, et al. 1975. List of Fungi in Soft-Rot Tissue Tests. Institute fur Holzbiologie und Holzschutz, Bundesforschungsanstalt fur Forst - und Holzwirtshaft, Hamburg - Lohbrugge, Germany	Cannon PF, Kirk PM. 2007. Fungal Families of the World. CAB International, Cambridge	Bills GF, et al. 2013. Current Opinion in microbiology, 16:549-565	Tedersoo L, et al. 2014. Science 346:1256688	Irinyi L, et al. 2015. Medical Mycology 53:313-337	Massimo NC, et al. 2015. Microbial Ecology 70:61-76	Busby PE, et al. 2016. New Phytologist 209:1681-1692	David AS, et al. 2016. Microbial Ecology 71:912-926
New.CleanUp.ReferenceOTU12293	23.0	5	Fungi	Basidiomycota	Pathotroph-Saprotroph-Symbiotroph	Fungal Parasite-Undefined Saprotroph	Possible	Tremelloid-Yeast	NULL	The order contains both teleomorphic and anamorphic species, most of the latter being yeasts	Sterkenburg E, et al. 2015. New Phytologist 207:1145-1158
New.CleanUp.ReferenceOTU3156	2.0	5	Fungi	Basidiomycota	Pathotroph-Saprotroph-Symbiotroph	Fungal Parasite-Undefined Saprotroph	Possible	Tremelloid-Yeast	NULL	The order contains both teleomorphic and anamorphic species, most of the latter being yeasts	Sterkenburg E, et al. 2015. New Phytologist 207:1145-1158
New.CleanUp.ReferenceOTU10002	0.0	6	Fungi	Ascomycota	Pathotroph-Saprotroph-Symbiotroph	Bryophyte Parasite-Ectomycorrhizal-Ericoid Mycorrhizal-Undefined Saprotroph	Possible	Microfungus	Dark Septate Microfungus	NULL	Syn.: Pezoloma among other (see e.g., Pezoloma ericae)	Baral and Krieglsteiner 2006. Acta Mycologica 41:11-20 (as a bryophyte parasite)	Huhtinen et al. 2010. Nova Hedwigia 90:413-431, Bent et al. 2011. Applied and Environmental Microbiology 77:3351-3359 (as ectomycorrhizae)	Tedersoo L, et al. 2014. Science 346:1256688 (as saprotroph)
New.CleanUp.ReferenceOTU4299	34.0	6	Fungi	Basidiomycota	Pathotroph-Saprotroph-Symbiotroph	Fungal Parasite-Undefined Saprotroph	Possible	Tremelloid-Yeast	NULL	The order contains both teleomorphic and anamorphic species, most of the latter being yeasts	Sterkenburg E, et al. 2015. New Phytologist 207:1145-1158
New.CleanUp.ReferenceOTU10161	1.0	62	Fungi	Ascomycota	Pathotroph-Saprotroph-Symbiotroph	Animal Pathogen-Dung Saprotroph-Endophyte-Epiphyte-Plant Saprotroph-Wood Saprotroph	Possible	Microfungus	Soft Rot	Saprobic, acting as key decay organisms of plant materials and plant-derived commodities (Cannon & Kirk 2007)	Epiphyte detection method-culture (Massimo et al. 2015)	Endophyte detection method-culture (Busby et al. 2016, David et al. 2016)	Likely opportunistic human pathogen (Irinyi et al. 2015)	Seehann G, et al. 1975. List of Fungi in Soft-Rot Tissue Tests. Institute fur Holzbiologie und Holzschutz, Bundesforschungsanstalt fur Forst - und Holzwirtshaft, Hamburg - Lohbrugge, Germany	Cannon PF, Kirk PM. 2007. Fungal Families of the World. CAB International, Cambridge	Bills GF, et al. 2013. Current Opinion in microbiology, 16:549-565	Tedersoo L, et al. 2014. Science 346:1256688	Irinyi L, et al. 2015. Medical Mycology 53:313-337	Massimo NC, et al. 2015. Microbial Ecology 70:61-76	Busby PE, et al. 2016. New Phytologist 209:1681-1692	David AS, et al. 2016. Microbial Ecology 71:912-926
New.CleanUp.ReferenceOTU8960	9.0	66	Fungi	Ascomycota	Pathotroph-Saprotroph-Symbiotroph	Endophyte-Lichen Parasite-Undefined Saprotroph	Possible	Microfungus	NULL	NULL	Tedersoo L, et al. 2014. Science 346:1256688	Massimo NC, et al. 2015. Microbial Ecology 70:61-76	Lawrey JD, Diederich P. 2016. URL: http://www.lichenicolous.net [24 May 2017]
New.CleanUp.ReferenceOTU3605	0.0	7	Fungi	Ascomycota	Pathotroph-Saprotroph-Symbiotroph	Endophyte-Lichen Parasite-Wood Saprotroph	Highly Probable	Microfungus	Soft Rot	Endophyte Host - Caryophyllaceae (Costa et al. 2012)	Seehann G, et al. 1975. List of Fungi in Soft-Rot Tissue Tests. Institute fur Holzbiologie und Holzschutz, Bundesforschungsanstalt fur Forst - und Holzwirtshaft, Hamburg - Lohbrugge, Germany	Costa IPMW, et al. 2012. Mycotaxon 119:26	Lawrey JD, Diederich P. 2016. URL: http://www.lichenicolous.net [24 May 2017]
New.CleanUp.ReferenceOTU12114	4.0	7	Fungi	Ascomycota	Pathotroph-Saprotroph-Symbiotroph	Animal Pathogen-Endophyte-Plant Pathogen-Undefined Saprotroph	Possible	Microfungus	NULL	Saprobic in soil or rotting vegetation, some species heat-tolerant and associatated with silage and compost, a few associated with humans and animals (Cannon & Kirk 2007)	Cannon PF, Kirk PM. 2007. Fungal Families of the World. CAB International, Cambridge
New.CleanUp.ReferenceOTU7995	0.0	7	Fungi	Zygomycota	Pathotroph-Saprotroph-Symbiotroph	Animal Endosymbiont-Animal Pathogen-Undefined Saprotroph	Probable	Microfungus	NULL	Basidiobolus ranarum is commonly present in decaying fruit and vegetable matter, and as a commensal in the intestinal tract of frogs, toads, and lizards - Cause of subcutaneous zygomycosis in humans (Cannon & Kirk 2007)	Cannon PF, Kirk PM. 2007. Fungal Families of the World. CAB International, Cambridge
New.ReferenceOTU94	701.0	863	Fungi	Basidiomycota	Pathotroph-Saprotroph-Symbiotroph	Fungal Parasite-Undefined Saprotroph	Possible	Tremelloid-Yeast	NULL	The order contains both teleomorphic and anamorphic species, most of the latter being yeasts	Sterkenburg E, et al. 2015. New Phytologist 207:1145-1158
New.CleanUp.ReferenceOTU10798	90.0	1	Fungi	Ascomycota	Pathotroph-Symbiotroph	Epiphyte-Plant Pathogen	Possible	Microfungus	NULL	Epiphytic or biotrophic on living leaves, very little is known (Cannon & Kirk 2007)	Cannon PF, Kirk PM. 2007. Fungal Families of the World. CAB International, Cambridge
New.CleanUp.ReferenceOTU15257	0.0	1	Fungi	Ascomycota	Pathotroph-Symbiotroph	Lichen Parasite-Lichenized	Probable	Microfungus-Thallus	NULL	Lichenized with green algae, occasionally lichenicolous, on rocks, mosses and wood (Cannon & Kirk 2007)	Cannon PF, Kirk PM. 2007. Fungal Families of the World. CAB International, Cambridge
New.CleanUp.ReferenceOTU7407	3.0	15	Fungi	Ascomycota	Pathotroph-Symbiotroph	Endophyte-Plant Pathogen	Possible	NULL	NULL	Host - Cannabaceae, Moraceae, Oleaceae	Costa IPMW, et al. 2012. Mycotaxon 119:26
New.CleanUp.ReferenceOTU4610	2.0	2	Fungi	Ascomycota	Pathotroph-Symbiotroph	Ericoid Mycorrhizal	Probable	Dark Septate Endophyte	NULL	NULL	Newsham 2011. New Phytologist 190:783-793 (as DSE)
New.ReferenceOTU117	1.0	3	Fungi	Ascomycota	Pathotroph-Symbiotroph	Ericoid Mycorrhizal	Probable	Dark Septate Endophyte	NULL	NULL	Newsham 2011. New Phytologist 190:783-793 (as DSE)
New.CleanUp.ReferenceOTU8921	2.0	3	Fungi	Ascomycota	Pathotroph-Symbiotroph	Ericoid Mycorrhizal	Probable	Dark Septate Endophyte	NULL	NULL	Newsham 2011. New Phytologist 190:783-793 (as DSE)
New.CleanUp.ReferenceOTU2362	0.0	4	Fungi	Ascomycota	Pathotroph-Symbiotroph	Ericoid Mycorrhizal	Probable	Dark Septate Endophyte	NULL	NULL	Newsham 2011. New Phytologist 190:783-793 (as DSE)
New.CleanUp.ReferenceOTU8490	2.0	5	Fungi	Ascomycota	Pathotroph-Symbiotroph	Epiphyte-Plant Pathogen	Possible	Microfungus	NULL	Epiphytic or biotrophic on living leaves, very little is known (Cannon & Kirk 2007)	Cannon PF, Kirk PM. 2007. Fungal Families of the World. CAB International, Cambridge
New.ReferenceOTU35	3.0	1	Fungi	Basidiomycota	Saprotroph	Undefined Saprotroph	Probable	Corticioid	White Rot	NULL	Tedersoo L, et al. 2014. Science 346:1256688
New.CleanUp.ReferenceOTU377	0.0	1	Fungi	Basidiomycota	Saprotroph	Undefined Saprotroph	Probable	Corticioid	White Rot	NULL	Tedersoo L, et al. 2014. Science 346:1256688
New.CleanUp.ReferenceOTU11483	17.0	1	Fungi	Ascomycota	Saprotroph	Undefined Saprotroph	Possible	Microfungus	NULL	NULL	Sterkenburg E, et al. 2015. New Phytologist 207:1145-1158
New.CleanUp.ReferenceOTU6193	1.0	1	Fungi	Ascomycota	Saprotroph	Undefined Saprotroph	Possible	Microfungus	NULL	NULL	Sterkenburg E, et al. 2015. New Phytologist 207:1145-1158
New.CleanUp.ReferenceOTU10178	8.0	1	Fungi	Ascomycota	Saprotroph	Undefined Saprotroph	Probable	Facultative Yeast	NULL	NULL	James TY, et al. 2006. Nature 443:818-822
New.CleanUp.ReferenceOTU9670	7.0	1	Fungi	Ascomycota	Saprotroph	Undefined Saprotroph	Possible	Microfungus	NULL	NULL	Sterkenburg E, et al. 2015. New Phytologist 207:1145-1158
New.CleanUp.ReferenceOTU434	1.0	1	Fungi	Ascomycota	Saprotroph	Undefined Saprotroph	Possible	Microfungus	NULL	NULL	Sterkenburg E, et al. 2015. New Phytologist 207:1145-1158
New.CleanUp.ReferenceOTU3111	26.0	1	Fungi	Ascomycota	Saprotroph	Undefined Saprotroph	Probable	NULL	NULL	NULL	Tedersoo L, et al. 2014. Science 346:1256688
New.CleanUp.ReferenceOTU7476	0.0	1	Fungi	Ascomycota	Saprotroph	Undefined Saprotroph	Probable	NULL	NULL	NULL	Tedersoo L, et al. 2014. Science 346:1256688
SH183331.07FU_KF039895_refs	0.0	1	Fungi	Ascomycota	Saprotroph	Soil Saprotroph	Probable	Microfungus	NULL	This genus is now restricted to one species Geomyces auratus	however, it is important to note that the majority of species that once comprised this genus, including the White-Nose Bat Syndrome causing Geomyces destructans, are now placed in the genus Pseudogymnoascus (see Minnis & Lindner 2013)	Minnis AM, Lindner DL. 2013. Fungal Biology 117:638-649	Tedersoo L, et al. 2014. Science 346:1256688
New.CleanUp.ReferenceOTU8898	1.0	1	Fungi	Ascomycota	Saprotroph	Undefined Saprotroph	Probable	NULL	NULL	NULL	Tedersoo L, et al. 2014. Science 346:1256688
New.CleanUp.ReferenceOTU3897	0.0	1	Fungi	Ascomycota	Saprotroph	Undefined Saprotroph	Probable	NULL	NULL	NULL	Tedersoo L, et al. 2014. Science 346:1256688
New.CleanUp.ReferenceOTU3807	0.0	1	Fungi	Ascomycota	Saprotroph	Undefined Saprotroph	Probable	Pezizoid	NULL	Common name - eye lash cup	Tedersoo L, et al. 2014. Science 346:1256688
New.ReferenceOTU154	0.0	1	Fungi	Ascomycota	Saprotroph	Undefined Saprotroph	Possible	Yeast	NULL	NULL	Sterkenburg E, et al. 2015. New Phytologist 207:1145-1158
New.CleanUp.ReferenceOTU11298	0.0	1	Fungi	Ascomycota	Saprotroph	Undefined Saprotroph	Possible	Yeast	NULL	NULL	Sterkenburg E, et al. 2015. New Phytologist 207:1145-1158
New.CleanUp.ReferenceOTU11624	0.0	1	Fungi	Ascomycota	Saprotroph	Dung Saprotroph-Plant Saprotroph	Probable	Microfungus	Null	Saprobic, especially on dung and rotting vegetation but also found associated with food stuffs (Cannon & Kirk 2007)	Cannon PF, Kirk PM. 2007. Fungal Families of the World. CAB International, Cambridge
New.CleanUp.ReferenceOTU768	10.0	1	Fungi	Ascomycota	Saprotroph	Undefined Saprotroph	Probable	NULL	NULL	NULL	Tedersoo L, et al. 2014. Science 346:1256688
New.CleanUp.ReferenceOTU9605	0.0	1	Fungi	Ascomycota	Saprotroph	Undefined Saprotroph-Wood Saprotroph	Probable	NULL	Soft Rot	NULL	Seehann G, et al. 1975. List of Fungi in Soft-Rot Tissue Tests. Institute fur Holzbiologie und Holzschutz, Bundesforschungsanstalt fur Forst - und Holzwirtshaft, Hamburg - Lohbrugge, Germany	Costa IPMW, et al. 2012. Mycotaxon 119:26	Tedersoo L, et al. 2014. Science 346:1256688
New.CleanUp.ReferenceOTU12623	4.0	1	Fungi	Ascomycota	Saprotroph	Undefined Saprotroph-Wood Saprotroph	Probable	NULL	Soft Rot	NULL	Seehann G, et al. 1975. List of Fungi in Soft-Rot Tissue Tests. Institute fur Holzbiologie und Holzschutz, Bundesforschungsanstalt fur Forst - und Holzwirtshaft, Hamburg - Lohbrugge, Germany	Costa IPMW, et al. 2012. Mycotaxon 119:26	Tedersoo L, et al. 2014. Science 346:1256688
New.CleanUp.ReferenceOTU7434	0.0	1	Fungi	Ascomycota	Saprotroph	Undefined Saprotroph	Probable	NULL	NULL	NULL	Tedersoo L, et al. 2014. Science 346:1256688
New.CleanUp.ReferenceOTU3908	1.0	1	Fungi	Ascomycota	Saprotroph	Undefined Saprotroph	Possible	Microfungus	NULL	NULL	Sterkenburg E, et al. 2015. New Phytologist 207:1145-1158
New.CleanUp.ReferenceOTU12313	0.0	1	Fungi	Ascomycota	Saprotroph	Undefined Saprotroph	Probable	NULL	NULL	NULL	Tedersoo L, et al. 2014. Science 346:1256688
New.CleanUp.ReferenceOTU6574	1.0	1	Fungi	Ascomycota	Saprotroph	Undefined Saprotroph	Probable	NULL	NULL	NULL	Tedersoo L, et al. 2014. Science 346:1256688
New.ReferenceOTU222	2.0	1	Fungi	Basidiomycota	Saprotroph	Soil Saprotroph	Possible	Microfungus	NULL	From forest soil (Calduch et al. 2002)	Calduch M, et al. 2002. Mycologia 94:355-361
New.ReferenceOTU211	97.0	10	Fungi	Ascomycota	Saprotroph	Undefined Saprotroph	Possible	Microfungus	NULL	NULL	Sterkenburg E, et al. 2015. New Phytologist 207:1145-1158
New.CleanUp.ReferenceOTU1806	0.0	10	Fungi	Ascomycota	Saprotroph	Dung Saprotroph-Plant Saprotroph	Probable	Microfungus	Null	Saprobic, especially on dung and rotting vegetation but also found associated with food stuffs (Cannon & Kirk 2007)	Cannon PF, Kirk PM. 2007. Fungal Families of the World. CAB International, Cambridge
New.CleanUp.ReferenceOTU6057	34.0	108	Fungi	Ascomycota	Saprotroph	Undefined Saprotroph	Possible	Microfungus	NULL	NULL	Sterkenburg E, et al. 2015. New Phytologist 207:1145-1158
New.CleanUp.ReferenceOTU2937	0.0	11	Fungi	Basidiomycota	Saprotroph	Undefined Saprotroph	Probable	Agaricoid	NULL	NULL	Tedersoo L, et al. 2014. Science 346:1256688
New.ReferenceOTU4	0.0	116	Fungi	Ascomycota	Saprotroph	Dung Saprotroph-Plant Saprotroph	Probable	Microfungus	NULL	Saprobic, associated with dung and rotting vegetation (Cannon & Kirk 2007)	Cannon PF, Kirk PM. 2007. Fungal Families of the World. CAB International, Cambridge
New.ReferenceOTU109	67.0	12	Fungi	Ascomycota	Saprotroph	Undefined Saprotroph	Possible	Microfungus	NULL	NULL	Sterkenburg E, et al. 2015. New Phytologist 207:1145-1158
New.CleanUp.ReferenceOTU11452	101.0	12	Fungi	Zygomycota	Saprotroph	Undefined Saprotroph	Probable	NULL	NULL	NULL	Tedersoo L, et al. 2014. Science 346:1256688 (doi:10.1126/science.1256688)
New.CleanUp.ReferenceOTU17162	0.0	13	Fungi	Ascomycota	Saprotroph	Undefined Saprotroph	Probable	Pezizoid	NULL	Common name - eye lash cup	Tedersoo L, et al. 2014. Science 346:1256688
New.CleanUp.ReferenceOTU5792	22.0	13	Fungi	Ascomycota	Saprotroph	Undefined Saprotroph	Possible	Microfungus	NULL	NULL	Sterkenburg E, et al. 2015. New Phytologist 207:1145-1158
New.ReferenceOTU170	699.0	14	Fungi	Ascomycota	Saprotroph	Wood Saprotroph	Highly Probable	NULL	Soft Rot	NULL	Seehann G, et al. 1975. List of Fungi in Soft-Rot Tissue Tests. Institute fur Holzbiologie und Holzschutz, Bundesforschungsanstalt fur Forst - und Holzwirtshaft, Hamburg - Lohbrugge, Germany
New.CleanUp.ReferenceOTU4269	42.0	14	Fungi	Ascomycota	Saprotroph	Undefined Saprotroph	Possible	Microfungus	NULL	NULL	Sterkenburg E, et al. 2015. New Phytologist 207:1145-1158
New.ReferenceOTU85	0.0	140	Fungi	Ascomycota	Saprotroph	Undefined Saprotroph	Possible	Microfungus	NULL	NULL	Sterkenburg E, et al. 2015. New Phytologist 207:1145-1158
New.CleanUp.ReferenceOTU3216	9.0	147	Fungi	Ascomycota	Saprotroph	Undefined Saprotroph	Possible	Microfungus	NULL	NULL	Sterkenburg E, et al. 2015. New Phytologist 207:1145-1158
SH229375.07FU_DQ083011_refs	4.0	15	Fungi	Ascomycota	Saprotroph	Undefined Saprotroph	Possible	Microfungus	NULL	NULL	Sterkenburg E, et al. 2015. New Phytologist 207:1145-1158
New.ReferenceOTU107	15.0	16	Fungi	Ascomycota	Saprotroph	Undefined Saprotroph	Possible	Microfungus	NULL	NULL	Sterkenburg E, et al. 2015. New Phytologist 207:1145-1158
New.CleanUp.ReferenceOTU17012	1.0	17	Fungi	Ascomycota	Saprotroph	Undefined Saprotroph	Probable	NULL	NULL	NULL	Tedersoo L, et al. 2014. Science 346:1256688
New.CleanUp.ReferenceOTU13362	4.0	17	Fungi	Ascomycota	Saprotroph	Plant Saprotroph-Wood Saprotroph	Probable	Microfungus	NULL	Saprobic on woody and herbaceous material (Cannon & Kirk 2007)	Cannon PF, Kirk PM. 2007. Fungal Families of the World. CAB International, Cambridge
New.ReferenceOTU44	133.0	194	Fungi	Ascomycota	Saprotroph	Soil Saprotroph	Probable	Microfungus	NULL	This genus is now restricted to one species Geomyces auratus	however, it is important to note that the majority of species that once comprised this genus, including the White-Nose Bat Syndrome causing Geomyces destructans, are now placed in the genus Pseudogymnoascus (see Minnis & Lindner 2013)	Minnis AM, Lindner DL. 2013. Fungal Biology 117:638-649	Tedersoo L, et al. 2014. Science 346:1256688
SH176907.07FU_UDB011682_refs	0.0	2	Fungi	Basidiomycota	Saprotroph	Dung Saprotroph-Soil Saprotroph-Undefined Saprotroph	Probable	Agaricoid	NULL	NULL	Tedersoo L, et al. 2014. Science 346:1256688
New.CleanUp.ReferenceOTU309	0.0	2	Fungi	Ascomycota	Saprotroph	Dung Saprotroph-Plant Saprotroph	Probable	Microfungus	NULL	Saprobic, associated with dung and rotting vegetation (Cannon & Kirk 2007)	Cannon PF, Kirk PM. 2007. Fungal Families of the World. CAB International, Cambridge
New.CleanUp.ReferenceOTU3796	2.0	2	Fungi	Ascomycota	Saprotroph	Undefined Saprotroph	Possible	Microfungus	NULL	NULL	Sterkenburg E, et al. 2015. New Phytologist 207:1145-1158
New.CleanUp.ReferenceOTU7656	10.0	2	Fungi	Ascomycota	Saprotroph	Undefined Saprotroph	Probable	Facultative Yeast	NULL	NULL	James TY, et al. 2006. Nature 443:818-822
New.CleanUp.ReferenceOTU16892	3.0	2	Fungi	Ascomycota	Saprotroph	Undefined Saprotroph	Possible	Microfungus	NULL	NULL	Sterkenburg E, et al. 2015. New Phytologist 207:1145-1158
New.CleanUp.ReferenceOTU5001	0.0	2	Fungi	Ascomycota	Saprotroph	Undefined Saprotroph	Possible	Microfungus	NULL	NULL	Sterkenburg E, et al. 2015. New Phytologist 207:1145-1158
New.ReferenceOTU100	1.0	2	Fungi	Ascomycota	Saprotroph	Undefined Saprotroph	Probable	Facultative Yeast	NULL	NULL	James TY, et al. 2006. Nature 443:818-822
New.CleanUp.ReferenceOTU11918	0.0	2	Fungi	Ascomycota	Saprotroph	Undefined Saprotroph	Possible	Microfungus	NULL	NULL	Sterkenburg E, et al. 2015. New Phytologist 207:1145-1158
New.CleanUp.ReferenceOTU1673	0.0	2	Fungi	Ascomycota	Saprotroph	Soil Saprotroph	Probable	Microfungus	NULL	This genus is now restricted to one species Geomyces auratus	however, it is important to note that the majority of species that once comprised this genus, including the White-Nose Bat Syndrome causing Geomyces destructans, are now placed in the genus Pseudogymnoascus (see Minnis & Lindner 2013)	Minnis AM, Lindner DL. 2013. Fungal Biology 117:638-649	Tedersoo L, et al. 2014. Science 346:1256688
New.CleanUp.ReferenceOTU5469	1.0	2	Fungi	Ascomycota	Saprotroph	Undefined Saprotroph	Probable	NULL	NULL	NULL	Tedersoo L, et al. 2014. Science 346:1256688
New.CleanUp.ReferenceOTU14540	4.0	2	Fungi	Ascomycota	Saprotroph	Undefined Saprotroph	Possible	Yeast	NULL	NULL	Sterkenburg E, et al. 2015. New Phytologist 207:1145-1158
New.CleanUp.ReferenceOTU8081	19.0	2	Fungi	Ascomycota	Saprotroph	Undefined Saprotroph	Possible	Microfungus	NULL	NULL	Sterkenburg E, et al. 2015. New Phytologist 207:1145-1158
New.CleanUp.ReferenceOTU1852	29.0	2	Fungi	Ascomycota	Saprotroph	Undefined Saprotroph	Possible	Microfungus	NULL	NULL	Sterkenburg E, et al. 2015. New Phytologist 207:1145-1158
New.CleanUp.ReferenceOTU6672	0.0	2	Fungi	Ascomycota	Saprotroph	Undefined Saprotroph	Possible	Microfungus	NULL	NULL	Sterkenburg E, et al. 2015. New Phytologist 207:1145-1158
New.CleanUp.ReferenceOTU6066	0.0	2	Fungi	Ascomycota	Saprotroph	Undefined Saprotroph	Probable	NULL	NULL	NULL	Tedersoo L, et al. 2014. Science 346:1256688
New.CleanUp.ReferenceOTU12652	5.0	2	Fungi	Ascomycota	Saprotroph	Undefined Saprotroph	Probable	NULL	NULL	NULL	Tedersoo L, et al. 2014. Science 346:1256688
New.CleanUp.ReferenceOTU15863	0.0	2	Fungi	Ascomycota	Saprotroph	Undefined Saprotroph	Possible	Microfungus	NULL	NULL	Sterkenburg E, et al. 2015. New Phytologist 207:1145-1158
New.CleanUp.ReferenceOTU9607	4.0	2	Fungi	Ascomycota	Saprotroph	Undefined Saprotroph	Probable	Microfungus	NULL	Saprobes found dung, soil and rotting vegetation (Cannon & Kirk 2007)	Cannon PF, Kirk PM. 2007. Fungal Families of the World. CAB International, Cambridge
New.CleanUp.ReferenceOTU13604	0.0	2	Fungi	Ascomycota	Saprotroph	Undefined Saprotroph	Possible	Microfungus	NULL	NULL	Sterkenburg E, et al. 2015. New Phytologist 207:1145-1158
New.CleanUp.ReferenceOTU4455	2.0	2	Fungi	Ascomycota	Saprotroph	Undefined Saprotroph	Possible	Microfungus	NULL	NULL	Sterkenburg E, et al. 2015. New Phytologist 207:1145-1158
New.CleanUp.ReferenceOTU6895	5.0	2	Fungi	Ascomycota	Saprotroph	Undefined Saprotroph-Wood Saprotroph	Probable	Microfungus	NULL	Found in aquatic habitats, mostly in marine environments	saprobic on submerged or intertidal wood, occasionally associated with sand grains and similar substrata (Cannon & Kirk 2007)	Cannon PF, Kirk PM. 2007. Fungal Families of the World. CAB International, Cambridge
New.ReferenceOTU228	3.0	2	Fungi	Basidiomycota	Saprotroph	Soil Saprotroph	Possible	Microfungus	NULL	From forest soil (Calduch et al. 2002)	Calduch M, et al. 2002. Mycologia 94:355-361
New.CleanUp.ReferenceOTU15107	0.0	22	Fungi	Ascomycota	Saprotroph	Undefined Saprotroph	Possible	Microfungus	NULL	NULL	Sterkenburg E, et al. 2015. New Phytologist 207:1145-1158
New.CleanUp.ReferenceOTU12502	3.0	23	Fungi	Ascomycota	Saprotroph	Undefined Saprotroph	Possible	Microfungus	NULL	NULL	Sterkenburg E, et al. 2015. New Phytologist 207:1145-1158
New.CleanUp.ReferenceOTU14364	4.0	23	Fungi	Ascomycota	Saprotroph	Plant Saprotroph	Probable	NULL	NULL	Saprobic on dead plant parts, especially of palms, grasses etc., also isolated from soil (Cannon & Kirk 2007)	Cannon PF, Kirk PM. 2007. Fungal Families of the World. CAB International, Cambridge
New.CleanUp.ReferenceOTU1543	6.0	26	Fungi	Ascomycota	Saprotroph	Undefined Saprotroph	Probable	NULL	NULL	NULL	Tedersoo L, et al. 2014. Science 346:1256688
New.CleanUp.ReferenceOTU1691	0.0	26	Fungi	Ascomycota	Saprotroph	Undefined Saprotroph	Probable	NULL	NULL	NULL	Tedersoo L, et al. 2014. Science 346:1256688
New.CleanUp.ReferenceOTU11091	0.0	28	Fungi	Ascomycota	Saprotroph	Undefined Saprotroph	Probable	NULL	NULL	NULL	Tedersoo L, et al. 2014. Science 346:1256688
New.CleanUp.ReferenceOTU16194	0.0	28	Fungi	Ascomycota	Saprotroph	Undefined Saprotroph	Probable	NULL	NULL	NULL	Tedersoo L, et al. 2014. Science 346:1256688
SH195295.07FU_AB625592_refs	561.0	289	Fungi	Ascomycota	Saprotroph	Undefined Saprotroph-Wood Saprotroph	Probable	NULL	Soft Rot	NULL	Seehann G, et al. 1975. List of Fungi in Soft-Rot Tissue Tests. Institute fur Holzbiologie und Holzschutz, Bundesforschungsanstalt fur Forst - und Holzwirtshaft, Hamburg - Lohbrugge, Germany	Costa IPMW, et al. 2012. Mycotaxon 119:26	Tedersoo L, et al. 2014. Science 346:1256688
New.CleanUp.ReferenceOTU3675	0.0	3	Fungi	Basidiomycota	Saprotroph	Dung Saprotroph-Plant Saprotroph-Wood Saprotroph	Probable	Agaricoid	NULL	Saprobic, in grass, on dung, rotten wood and similar substrata (Cannon & Kirk 2007)	Cannon PF, Kirk PM. 2007. Fungal Families of the World. CAB International, Cambridge
New.CleanUp.ReferenceOTU5819	1.0	3	Fungi	Ascomycota	Saprotroph	Undefined Saprotroph	Probable	NULL	NULL	NULL	Tedersoo L, et al. 2014. Science 346:1256688
New.CleanUp.ReferenceOTU2467	4.0	3	Fungi	Ascomycota	Saprotroph	Wood Saprotroph	Highly Probable	NULL	Soft Rot	NULL	Seehann G, et al. 1975. List of Fungi in Soft-Rot Tissue Tests. Institute fur Holzbiologie und Holzschutz, Bundesforschungsanstalt fur Forst - und Holzwirtshaft, Hamburg - Lohbrugge, Germany
New.CleanUp.ReferenceOTU14028	12.0	3	Fungi	Ascomycota	Saprotroph	Soil Saprotroph	Probable	Microfungus	NULL	This genus is now restricted to one species Geomyces auratus	however, it is important to note that the majority of species that once comprised this genus, including the White-Nose Bat Syndrome causing Geomyces destructans, are now placed in the genus Pseudogymnoascus (see Minnis & Lindner 2013)	Minnis AM, Lindner DL. 2013. Fungal Biology 117:638-649	Tedersoo L, et al. 2014. Science 346:1256688
New.CleanUp.ReferenceOTU13756	11.0	3	Fungi	Ascomycota	Saprotroph	Soil Saprotroph	Probable	Microfungus	NULL	This genus is now restricted to one species Geomyces auratus	however, it is important to note that the majority of species that once comprised this genus, including the White-Nose Bat Syndrome causing Geomyces destructans, are now placed in the genus Pseudogymnoascus (see Minnis & Lindner 2013)	Minnis AM, Lindner DL. 2013. Fungal Biology 117:638-649	Tedersoo L, et al. 2014. Science 346:1256688
New.CleanUp.ReferenceOTU7256	1.0	3	Fungi	Ascomycota	Saprotroph	Undefined Saprotroph	Probable	NULL	NULL	NULL	Tedersoo L, et al. 2014. Science 346:1256688
New.CleanUp.ReferenceOTU3273	19.0	3	Fungi	Ascomycota	Saprotroph	Undefined Saprotroph	Possible	Yeast	NULL	NULL	Sterkenburg E, et al. 2015. New Phytologist 207:1145-1158
SH208361.07FU_HE608888_reps	55.0	32	Fungi	Ascomycota	Saprotroph	Undefined Saprotroph	Possible	Microfungus	NULL	NULL	Sterkenburg E, et al. 2015. New Phytologist 207:1145-1158
New.ReferenceOTU226	100.0	33	Fungi	Ascomycota	Saprotroph	Dung Saprotroph-Soil Saprotroph	Probable	Microfungus	NULL	Generally saprobic and keratinophilic, in soil or coprophilous, occasionally found on hair or horn (Cannon & Kirk 2007)	Cannon PF, Kirk PM. 2007. Fungal Families of the World. CAB International, Cambridge
New.CleanUp.ReferenceOTU11344	5.0	35	Fungi	Ascomycota	Saprotroph	Undefined Saprotroph	Possible	Microfungus	NULL	NULL	Sterkenburg E, et al. 2015. New Phytologist 207:1145-1158
New.CleanUp.ReferenceOTU11689	52.0	38	Fungi	Ascomycota	Saprotroph	Soil Saprotroph	Probable	Microfungus	NULL	This genus is now restricted to one species Geomyces auratus	however, it is important to note that the majority of species that once comprised this genus, including the White-Nose Bat Syndrome causing Geomyces destructans, are now placed in the genus Pseudogymnoascus (see Minnis & Lindner 2013)	Minnis AM, Lindner DL. 2013. Fungal Biology 117:638-649	Tedersoo L, et al. 2014. Science 346:1256688
New.ReferenceOTU103	2.0	4	Fungi	Ascomycota	Saprotroph	Undefined Saprotroph	Possible	Microfungus	NULL	NULL	Sterkenburg E, et al. 2015. New Phytologist 207:1145-1158
New.CleanUp.ReferenceOTU3568	82.0	4	Fungi	Ascomycota	Saprotroph	Undefined Saprotroph	Possible	Microfungus	NULL	NULL	Sterkenburg E, et al. 2015. New Phytologist 207:1145-1158
New.CleanUp.ReferenceOTU16618	0.0	4	Fungi	Ascomycota	Saprotroph	Undefined Saprotroph	Probable	NULL	NULL	NULL	Tedersoo L, et al. 2014. Science 346:1256688
New.CleanUp.ReferenceOTU2444	1.0	4	Fungi	Ascomycota	Saprotroph	Undefined Saprotroph	Possible	Microfungus	NULL	NULL	Tsuneda A, et al. 2011. Mycologia 103:1146-1155 (https://doi.org/10.3852/11-054)
New.CleanUp.ReferenceOTU8916	0.0	4	Fungi	Ascomycota	Saprotroph	Undefined Saprotroph	Possible	Yeast	NULL	NULL	Sterkenburg E, et al. 2015. New Phytologist 207:1145-1158
New.CleanUp.ReferenceOTU4304	9.0	4	Fungi	Ascomycota	Saprotroph	Undefined Saprotroph-Wood Saprotroph	Probable	NULL	Soft Rot	NULL	Seehann G, et al. 1975. List of Fungi in Soft-Rot Tissue Tests. Institute fur Holzbiologie und Holzschutz, Bundesforschungsanstalt fur Forst - und Holzwirtshaft, Hamburg - Lohbrugge, Germany	Costa IPMW, et al. 2012. Mycotaxon 119:26	Tedersoo L, et al. 2014. Science 346:1256688
New.CleanUp.ReferenceOTU10658	1.0	4	Fungi	Ascomycota	Saprotroph	Undefined Saprotroph	Possible	Microfungus	NULL	NULL	Sterkenburg E, et al. 2015. New Phytologist 207:1145-1158
SH213541.07FU_HE664150_reps	5.0	4	Fungi	Ascomycota	Saprotroph	Undefined Saprotroph	Possible	Microfungus	NULL	NULL	Sterkenburg E, et al. 2015. New Phytologist 207:1145-1158
New.CleanUp.ReferenceOTU13035	2.0	4	Fungi	Ascomycota	Saprotroph	Undefined Saprotroph	Probable	NULL	NULL	NULL	Tedersoo L, et al. 2014. Science 346:1256688
New.CleanUp.ReferenceOTU15685	0.0	4	Fungi	Basidiomycota	Saprotroph	Leaf Saprotroph	Possible	Yeast	NULL	NULL	Oberwinkler F, et al. 1983. Systematic and Applied Microbiology 4:114-122 (https://doi.org/10.1016/S0723-2020(83)80039-3)
New.ReferenceOTU176	18.0	40	Fungi	Ascomycota	Saprotroph	Undefined Saprotroph	Probable	Microfungus	NULL	Saprobes found dung, soil and rotting vegetation (Cannon & Kirk 2007)	Cannon PF, Kirk PM. 2007. Fungal Families of the World. CAB International, Cambridge
New.CleanUp.ReferenceOTU1088	48.0	43	Fungi	Ascomycota	Saprotroph	Undefined Saprotroph	Possible	Microfungus	NULL	NULL	Sterkenburg E, et al. 2015. New Phytologist 207:1145-1158
New.CleanUp.ReferenceOTU8333	79.0	44	Fungi	Ascomycota	Saprotroph	Soil Saprotroph	Probable	Microfungus	NULL	This genus is now restricted to one species Geomyces auratus	however, it is important to note that the majority of species that once comprised this genus, including the White-Nose Bat Syndrome causing Geomyces destructans, are now placed in the genus Pseudogymnoascus (see Minnis & Lindner 2013)	Minnis AM, Lindner DL. 2013. Fungal Biology 117:638-649	Tedersoo L, et al. 2014. Science 346:1256688
New.CleanUp.ReferenceOTU3267	24.0	45	Fungi	Zygomycota	Saprotroph	Undefined Saprotroph	Possible	Microfungus	NULL	NULL	Sterkenburg E, et al. 2015. New Phytologist 207:1145-1158
New.ReferenceOTU133	5.0	45	Fungi	Ascomycota	Saprotroph	Undefined Saprotroph	Possible	Microfungus	NULL	NULL	Sterkenburg E, et al. 2015. New Phytologist 207:1145-1158
New.CleanUp.ReferenceOTU3189	2.0	48	Fungi	Ascomycota	Saprotroph	Undefined Saprotroph	Probable	NULL	NULL	NULL	Tedersoo L, et al. 2014. Science 346:1256688
New.ReferenceOTU203	598.0	495	Fungi	Ascomycota	Saprotroph	Undefined Saprotroph	Possible	Microfungus	NULL	NULL	Sterkenburg E, et al. 2015. New Phytologist 207:1145-1158
New.CleanUp.ReferenceOTU9572	31.0	5	Fungi	Ascomycota	Saprotroph	Undefined Saprotroph	Possible	Microfungus	NULL	NULL	Sterkenburg E, et al. 2015. New Phytologist 207:1145-1158
New.CleanUp.ReferenceOTU5277	14.0	5	Fungi	Ascomycota	Saprotroph	Undefined Saprotroph	Possible	Microfungus	NULL	NULL	Sterkenburg E, et al. 2015. New Phytologist 207:1145-1158
New.CleanUp.ReferenceOTU4262	13.0	5	Fungi	Ascomycota	Saprotroph	Undefined Saprotroph	Possible	Microfungus	NULL	NULL	Sterkenburg E, et al. 2015. New Phytologist 207:1145-1158
SH177715.07FU_HE608903_reps	4.0	5	Fungi	Ascomycota	Saprotroph	Undefined Saprotroph	Possible	Microfungus	NULL	NULL	Sterkenburg E, et al. 2015. New Phytologist 207:1145-1158
New.CleanUp.ReferenceOTU3948	2.0	5	Fungi	Ascomycota	Saprotroph	Undefined Saprotroph	Probable	NULL	NULL	NULL	Tedersoo L, et al. 2014. Science 346:1256688
New.CleanUp.ReferenceOTU1422	1.0	5	Fungi	Ascomycota	Saprotroph	Undefined Saprotroph	Probable	Microfungus	NULL	Saprobes found dung, soil and rotting vegetation (Cannon & Kirk 2007)	Cannon PF, Kirk PM. 2007. Fungal Families of the World. CAB International, Cambridge
New.ReferenceOTU175	0.0	52	Fungi	Ascomycota	Saprotroph	Undefined Saprotroph	Probable	NULL	NULL	NULL	Tedersoo L, et al. 2014. Science 346:1256688
New.CleanUp.ReferenceOTU5399	36.0	53	Fungi	Ascomycota	Saprotroph	Undefined Saprotroph	Probable	Microfungus	NULL	Saprobes found dung, soil and rotting vegetation (Cannon & Kirk 2007)	Cannon PF, Kirk PM. 2007. Fungal Families of the World. CAB International, Cambridge
New.CleanUp.ReferenceOTU16165	0.0	56	Fungi	Ascomycota	Saprotroph	Undefined Saprotroph	Probable	NULL	NULL	NULL	Tedersoo L, et al. 2014. Science 346:1256688
New.CleanUp.ReferenceOTU15009	0.0	6	Fungi	Ascomycota	Saprotroph	Undefined Saprotroph	Probable	Microfungus	NULL	NULL	Tedersoo L, et al. 2014. Science 346:1256688
New.CleanUp.ReferenceOTU17478	0.0	6	Fungi	Ascomycota	Saprotroph	Undefined Saprotroph	Probable	NULL	NULL	NULL	Tedersoo L, et al. 2014. Science 346:1256688
New.CleanUp.ReferenceOTU12343	10.0	6	Fungi	Ascomycota	Saprotroph	Undefined Saprotroph	Probable	NULL	NULL	NULL	Tedersoo L, et al. 2014. Science 346:1256688
SH220702.07FU_JN983446_reps	70.0	6	Fungi	Ascomycota	Saprotroph	Undefined Saprotroph	Possible	Microfungus	NULL	NULL	Sterkenburg E, et al. 2015. New Phytologist 207:1145-1158
New.CleanUp.ReferenceOTU2547	7.0	6	Fungi	Ascomycota	Saprotroph	Wood Saprotroph	Probable	NULL	NULL	Saprobe in rotten wood, often in freshwater habitats (Cannon & Kirk 2007)	Cannon PF, Kirk PM. 2007. Fungal Families of the World. CAB International, Cambridge
New.CleanUp.ReferenceOTU10830	1.0	6	Fungi	Ascomycota	Saprotroph	Undefined Saprotroph	Possible	Microfungus	NULL	NULL	Sterkenburg E, et al. 2015. New Phytologist 207:1145-1158
New.CleanUp.ReferenceOTU1661	0.0	6	Fungi	Ascomycota	Saprotroph	Dung Saprotroph-Plant Saprotroph	Probable	Microfungus	Null	Saprobic, especially on dung and rotting vegetation but also found associated with food stuffs (Cannon & Kirk 2007)	Cannon PF, Kirk PM. 2007. Fungal Families of the World. CAB International, Cambridge
New.CleanUp.ReferenceOTU1142	3.0	6	Fungi	Ascomycota	Saprotroph	Wood Saprotroph	Probable	NULL	NULL	Saprobe in rotten wood, often in freshwater habitats (Cannon & Kirk 2007)	Cannon PF, Kirk PM. 2007. Fungal Families of the World. CAB International, Cambridge
New.CleanUp.ReferenceOTU9435	1.0	6	Fungi	Ascomycota	Saprotroph	Undefined Saprotroph	Possible	Microfungus	NULL	NULL	Sterkenburg E, et al. 2015. New Phytologist 207:1145-1158
New.CleanUp.ReferenceOTU6123	0.0	6	Fungi	Ascomycota	Saprotroph	Plant Saprotroph	Probable	NULL	NULL	Saprobic on dead plant parts, especially of palms, grasses etc., also isolated from soil (Cannon & Kirk 2007)	Cannon PF, Kirk PM. 2007. Fungal Families of the World. CAB International, Cambridge
New.CleanUp.ReferenceOTU9824	45.0	60	Fungi	Ascomycota	Saprotroph	Undefined Saprotroph	Probable	NULL	NULL	NULL	Tedersoo L, et al. 2014. Science 346:1256688
SH201187.07FU_EU754958_reps	32.0	68	Fungi	Ascomycota	Saprotroph	Undefined Saprotroph	Probable	Microfungus	NULL	Saprobes found dung, soil and rotting vegetation (Cannon & Kirk 2007)	Cannon PF, Kirk PM. 2007. Fungal Families of the World. CAB International, Cambridge
New.CleanUp.ReferenceOTU5740	5.0	7	Fungi	Ascomycota	Saprotroph	Undefined Saprotroph	Probable	NULL	NULL	NULL	Tedersoo L, et al. 2014. Science 346:1256688
SH217194.07FU_HM439513_reps	11.0	7	Fungi	Ascomycota	Saprotroph	Undefined Saprotroph	Possible	Microfungus	NULL	NULL	Sterkenburg E, et al. 2015. New Phytologist 207:1145-1158
New.ReferenceOTU213	261.0	75	Fungi	Ascomycota	Saprotroph	Undefined Saprotroph	Probable	Facultative Yeast	NULL	NULL	James TY, et al. 2006. Nature 443:818-822
New.CleanUp.ReferenceOTU11306	1.0	8	Fungi	Ascomycota	Saprotroph	Undefined Saprotroph	Possible	Microfungus	NULL	NULL	Sterkenburg E, et al. 2015. New Phytologist 207:1145-1158
New.CleanUp.ReferenceOTU9773	9.0	8	Fungi	Ascomycota	Saprotroph	Dung Saprotroph	Highly Probable	Microfungus	NULL	NULL	Bell A. 1983. Dung Fungi: An Illustrated Guide to Coprophilous Fungi in New Zealand. Victoria University Press, Wellington
New.CleanUp.ReferenceOTU12892	0.0	9	Fungi	Ascomycota	Saprotroph	Undefined Saprotroph	Possible	Microfungus	NULL	NULL	Sterkenburg E, et al. 2015. New Phytologist 207:1145-1158
New.ReferenceOTU20	99.0	98	Fungi	Ascomycota	Saprotroph	Dung Saprotroph-Wood Saprotroph	Probable	NULL	Soft Rot	NULL	Duncan CG, Eslyn WE. 1966. Mycologia 58:642-645	Bell A.��1983. Dung Fungi: An Illustrated Guide to Coprophilous Fungi in New Zealand. Victoria University Press, Wellington	Tedersoo L, et al. 2014. Science 346:1256691
New.CleanUp.ReferenceOTU16173	2.0	1	Fungi	Basidiomycota	Saprotroph-Symbiotroph	Ectomycorrhizal-Undefined Saprotroph	Probable	Agaricoid	NULL	Ectomycorrhizal or saprobic, on the ground in woods, fields and moorland (Cannon & Kirk 2007)	Cannon PF, Kirk PM. 2007. Fungal Families of the World. CAB International, Cambridge
New.ReferenceOTU76	0.0	1	Fungi	Zygomycota	Saprotroph-Symbiotroph	Endophyte-Litter Saprotroph-Soil Saprotroph-Undefined Saprotroph	Possible	Microfungus	NULL	Saprobic in soil and thus frequenctly isolated from soil and material contaminated with soil such as hay or rotten silage and spoil tips (Cannon & Kirk 2007)	Cannon PF, Kirk PM. 2007. Fungal Families of the World. CAB International, Cambridge	Purahong W, et al. 2016. Molecular Ecology 25:4059-4074
New.CleanUp.ReferenceOTU4900	0.0	1	Fungi	Zygomycota	Saprotroph-Symbiotroph	Endophyte-Litter Saprotroph-Soil Saprotroph-Undefined Saprotroph	Possible	Microfungus	NULL	Saprobic in soil and thus frequenctly isolated from soil and material contaminated with soil such as hay or rotten silage and spoil tips (Cannon & Kirk 2007)	Cannon PF, Kirk PM. 2007. Fungal Families of the World. CAB International, Cambridge	Purahong W, et al. 2016. Molecular Ecology 25:4059-4074
New.CleanUp.ReferenceOTU4929	0.0	1	Fungi	Zygomycota	Saprotroph-Symbiotroph	Endophyte-Litter Saprotroph-Soil Saprotroph-Undefined Saprotroph	Possible	Microfungus	NULL	Saprobic in soil and thus frequenctly isolated from soil and material contaminated with soil such as hay or rotten silage and spoil tips (Cannon & Kirk 2007)	Cannon PF, Kirk PM. 2007. Fungal Families of the World. CAB International, Cambridge	Purahong W, et al. 2016. Molecular Ecology 25:4059-4074
New.CleanUp.ReferenceOTU16978	0.0	1	Fungi	Zygomycota	Saprotroph-Symbiotroph	Endophyte-Litter Saprotroph-Soil Saprotroph-Undefined Saprotroph	Possible	Microfungus	NULL	Saprobic in soil and thus frequenctly isolated from soil and material contaminated with soil such as hay or rotten silage and spoil tips (Cannon & Kirk 2007)	Cannon PF, Kirk PM. 2007. Fungal Families of the World. CAB International, Cambridge	Purahong W, et al. 2016. Molecular Ecology 25:4059-4074
New.CleanUp.ReferenceOTU12476	1.0	1	Fungi	Zygomycota	Saprotroph-Symbiotroph	Endophyte-Litter Saprotroph-Soil Saprotroph-Undefined Saprotroph	Possible	Microfungus	NULL	Saprobic in soil and thus frequenctly isolated from soil and material contaminated with soil such as hay or rotten silage and spoil tips (Cannon & Kirk 2007)	Cannon PF, Kirk PM. 2007. Fungal Families of the World. CAB International, Cambridge	Purahong W, et al. 2016. Molecular Ecology 25:4059-4074
New.CleanUp.ReferenceOTU1547	0.0	1	Fungi	Zygomycota	Saprotroph-Symbiotroph	Endophyte-Litter Saprotroph-Soil Saprotroph-Undefined Saprotroph	Possible	Microfungus	NULL	Saprobic in soil and thus frequenctly isolated from soil and material contaminated with soil such as hay or rotten silage and spoil tips (Cannon & Kirk 2007)	Cannon PF, Kirk PM. 2007. Fungal Families of the World. CAB International, Cambridge	Purahong W, et al. 2016. Molecular Ecology 25:4059-4074
New.CleanUp.ReferenceOTU1816	0.0	1	Fungi	Zygomycota	Saprotroph-Symbiotroph	Endophyte-Litter Saprotroph-Soil Saprotroph-Undefined Saprotroph	Possible	Microfungus	NULL	Saprobic in soil and thus frequenctly isolated from soil and material contaminated with soil such as hay or rotten silage and spoil tips (Cannon & Kirk 2007)	Cannon PF, Kirk PM. 2007. Fungal Families of the World. CAB International, Cambridge	Purahong W, et al. 2016. Molecular Ecology 25:4059-4074
New.CleanUp.ReferenceOTU5948	0.0	1	Fungi	Zygomycota	Saprotroph-Symbiotroph	Endophyte-Litter Saprotroph-Soil Saprotroph-Undefined Saprotroph	Possible	Microfungus	NULL	Saprobic in soil and thus frequenctly isolated from soil and material contaminated with soil such as hay or rotten silage and spoil tips (Cannon & Kirk 2007)	Cannon PF, Kirk PM. 2007. Fungal Families of the World. CAB International, Cambridge	Purahong W, et al. 2016. Molecular Ecology 25:4059-4074
New.CleanUp.ReferenceOTU659	4.0	1	Fungi	Ascomycota	Saprotroph-Symbiotroph	Dung Saprotroph-Ectomycorrhizal-Litter Saprotroph-Undefined Saprotroph	Possible	Pezizoid	NULL	Saprobic or ectomycorrhizal, on or in soil, leafmould etc., some species associated with dung or fire sites (Cannon & Kirk 2007)	Cannon PF, Kirk PM. 2007. Fungal Families of the World. CAB International, Cambridge
New.CleanUp.ReferenceOTU14702	0.0	10	Fungi	Zygomycota	Saprotroph-Symbiotroph	Endophyte-Litter Saprotroph-Soil Saprotroph-Undefined Saprotroph	Possible	Microfungus	NULL	Saprobic in soil and thus frequenctly isolated from soil and material contaminated with soil such as hay or rotten silage and spoil tips (Cannon & Kirk 2007)	Cannon PF, Kirk PM. 2007. Fungal Families of the World. CAB International, Cambridge	Purahong W, et al. 2016. Molecular Ecology 25:4059-4074
New.CleanUp.ReferenceOTU15983	2.0	11	Fungi	Zygomycota	Saprotroph-Symbiotroph	Endophyte-Litter Saprotroph-Soil Saprotroph-Undefined Saprotroph	Possible	Microfungus	NULL	Saprobic in soil and thus frequenctly isolated from soil and material contaminated with soil such as hay or rotten silage and spoil tips (Cannon & Kirk 2007)	Cannon PF, Kirk PM. 2007. Fungal Families of the World. CAB International, Cambridge	Purahong W, et al. 2016. Molecular Ecology 25:4059-4074
New.CleanUp.ReferenceOTU6330	0.0	11	Fungi	Zygomycota	Saprotroph-Symbiotroph	Endophyte-Litter Saprotroph-Soil Saprotroph-Undefined Saprotroph	Possible	Microfungus	NULL	Saprobic in soil and thus frequenctly isolated from soil and material contaminated with soil such as hay or rotten silage and spoil tips (Cannon & Kirk 2007)	Cannon PF, Kirk PM. 2007. Fungal Families of the World. CAB International, Cambridge	Purahong W, et al. 2016. Molecular Ecology 25:4059-4074
New.CleanUp.ReferenceOTU1608	6.0	12	Fungi	Basidiomycota	Saprotroph-Symbiotroph	Ectomycorrhizal-Undefined Saprotroph	Probable	Agaricoid	NULL	Ectomycorrhizal or saprobic, on the ground in woods, fields and moorland (Cannon & Kirk 2007)	Cannon PF, Kirk PM. 2007. Fungal Families of the World. CAB International, Cambridge
New.CleanUp.ReferenceOTU13501	0.0	12	Fungi	Ascomycota	Saprotroph-Symbiotroph	Dung Saprotroph-Endophyte-Litter Saprotroph-Undefined Saprotroph	Possible	Microfungus	NULL	Endophyte detection method-culture (David et al. 2016)	Bell A. 1983. Dung Fungi: An Illustrated Guide to Coprophilous Fungi in New Zealand. Victoria University Press, Wellington	Tedersoo L, et al. 2014. Science 346:1256688	David AS, et al. 2016. Microbial Ecology 71:912-926	Purahong W, et al. 2016. Molecular Ecology 25:4059-4074 (as litter saprotroph)
New.CleanUp.ReferenceOTU1797	4.0	13	Fungi	Basidiomycota	Saprotroph-Symbiotroph	Ectomycorrhizal-Undefined Saprotroph	Probable	Agaricoid	NULL	Ectomycorrhizal or saprobic, on the ground in woods, fields and moorland (Cannon & Kirk 2007)	Cannon PF, Kirk PM. 2007. Fungal Families of the World. CAB International, Cambridge
New.CleanUp.ReferenceOTU17807	44.0	14	Fungi	Ascomycota	Saprotroph-Symbiotroph	Endophyte-Litter Saprotroph-Wood Saprotroph	Probable	NULL	NULL	NULL	Réblová M et al. 2006. Mycological Research 110:104-109	Tedersoo L, et al. 2014. Science 346:1256688
New.CleanUp.ReferenceOTU9043	2.0	15	Fungi	Ascomycota	Saprotroph-Symbiotroph	Ectomycorrhizal-Fungal Parasite-Plant Pathogen-Wood Saprotroph	Probable	Microfungus	NULL	Usually saprobic on herbaceous or woody tissues, some species fungicolous. A few species are known to form mycorrhizae (Cannon & Kirk 2007)	Cannon PF, Kirk PM. 2007. Fungal Families of the World. CAB International, Cambridge
New.ReferenceOTU77	35.0	18	Fungi	Ascomycota	Saprotroph-Symbiotroph	Dung Saprotroph-Endophyte-Litter Saprotroph-Undefined Saprotroph	Possible	Microfungus	NULL	Endophyte detection method-culture (David et al. 2016)	Bell A. 1983. Dung Fungi: An Illustrated Guide to Coprophilous Fungi in New Zealand. Victoria University Press, Wellington	Tedersoo L, et al. 2014. Science 346:1256688	David AS, et al. 2016. Microbial Ecology 71:912-926	Purahong W, et al. 2016. Molecular Ecology 25:4059-4074 (as litter saprotroph)
New.ReferenceOTU115	54.0	184	Fungi	Zygomycota	Saprotroph-Symbiotroph	Endophyte-Litter Saprotroph-Soil Saprotroph-Undefined Saprotroph	Possible	Microfungus	NULL	Saprobic in soil and thus frequenctly isolated from soil and material contaminated with soil such as hay or rotten silage and spoil tips (Cannon & Kirk 2007)	Cannon PF, Kirk PM. 2007. Fungal Families of the World. CAB International, Cambridge	Purahong W, et al. 2016. Molecular Ecology 25:4059-4074
New.CleanUp.ReferenceOTU4100	0.0	2	Fungi	Basidiomycota	Saprotroph-Symbiotroph	Ectomycorrhizal-Undefined Saprotroph	Probable	Agaricoid	NULL	Ectomycorrhizal or saprobic, on the ground in woods, fields and moorland (Cannon & Kirk 2007)	Cannon PF, Kirk PM. 2007. Fungal Families of the World. CAB International, Cambridge
New.CleanUp.ReferenceOTU6752	0.0	2	Fungi	Basidiomycota	Saprotroph-Symbiotroph	Ectomycorrhizal-Undefined Saprotroph	Probable	Agaricoid	NULL	Ectomycorrhizal or saprobic, on the ground in woods, fields and moorland (Cannon & Kirk 2007)	Cannon PF, Kirk PM. 2007. Fungal Families of the World. CAB International, Cambridge
New.ReferenceOTU174	4.0	2	Fungi	Zygomycota	Saprotroph-Symbiotroph	Endophyte-Litter Saprotroph-Soil Saprotroph-Undefined Saprotroph	Possible	Microfungus	NULL	Saprobic in soil and thus frequenctly isolated from soil and material contaminated with soil such as hay or rotten silage and spoil tips (Cannon & Kirk 2007)	Cannon PF, Kirk PM. 2007. Fungal Families of the World. CAB International, Cambridge	Purahong W, et al. 2016. Molecular Ecology 25:4059-4074
New.ReferenceOTU165	9.0	2	Fungi	Zygomycota	Saprotroph-Symbiotroph	Endophyte-Litter Saprotroph-Soil Saprotroph-Undefined Saprotroph	Possible	Microfungus	NULL	Saprobic in soil and thus frequenctly isolated from soil and material contaminated with soil such as hay or rotten silage and spoil tips (Cannon & Kirk 2007)	Cannon PF, Kirk PM. 2007. Fungal Families of the World. CAB International, Cambridge	Purahong W, et al. 2016. Molecular Ecology 25:4059-4074
New.CleanUp.ReferenceOTU389	1.0	2	Fungi	Zygomycota	Saprotroph-Symbiotroph	Endophyte-Litter Saprotroph-Soil Saprotroph-Undefined Saprotroph	Possible	Microfungus	NULL	Saprobic in soil and thus frequenctly isolated from soil and material contaminated with soil such as hay or rotten silage and spoil tips (Cannon & Kirk 2007)	Cannon PF, Kirk PM. 2007. Fungal Families of the World. CAB International, Cambridge	Purahong W, et al. 2016. Molecular Ecology 25:4059-4074
New.CleanUp.ReferenceOTU405	9.0	2	Fungi	Zygomycota	Saprotroph-Symbiotroph	Endophyte-Litter Saprotroph-Soil Saprotroph-Undefined Saprotroph	Possible	Microfungus	NULL	Saprobic in soil and thus frequenctly isolated from soil and material contaminated with soil such as hay or rotten silage and spoil tips (Cannon & Kirk 2007)	Cannon PF, Kirk PM. 2007. Fungal Families of the World. CAB International, Cambridge	Purahong W, et al. 2016. Molecular Ecology 25:4059-4074
New.CleanUp.ReferenceOTU11270	1.0	2	Fungi	Zygomycota	Saprotroph-Symbiotroph	Endophyte-Litter Saprotroph-Soil Saprotroph-Undefined Saprotroph	Possible	Microfungus	NULL	Saprobic in soil and thus frequenctly isolated from soil and material contaminated with soil such as hay or rotten silage and spoil tips (Cannon & Kirk 2007)	Cannon PF, Kirk PM. 2007. Fungal Families of the World. CAB International, Cambridge	Purahong W, et al. 2016. Molecular Ecology 25:4059-4074
New.CleanUp.ReferenceOTU4818	0.0	2	Fungi	Ascomycota	Saprotroph-Symbiotroph	Dung Saprotroph-Endophyte-Litter Saprotroph-Undefined Saprotroph	Possible	Microfungus	NULL	Endophyte detection method-culture (David et al. 2016)	Bell A. 1983. Dung Fungi: An Illustrated Guide to Coprophilous Fungi in New Zealand. Victoria University Press, Wellington	Tedersoo L, et al. 2014. Science 346:1256688	David AS, et al. 2016. Microbial Ecology 71:912-926	Purahong W, et al. 2016. Molecular Ecology 25:4059-4074 (as litter saprotroph)
New.ReferenceOTU129	8.0	22	Fungi	Ascomycota	Saprotroph-Symbiotroph	Dung Saprotroph-Endophyte-Undefined Saprotroph	Probable	Microfungus	NULL	Endophyte detection method-culture (David et al. 2016)	Tedersoo L, et al. 2014. Science 346:1256688	David AS, et al. 2016. Microbial Ecology 71:912-926
New.ReferenceOTU26	158.0	236	Fungi	Zygomycota	Saprotroph-Symbiotroph	Endophyte-Litter Saprotroph-Soil Saprotroph-Undefined Saprotroph	Possible	Microfungus	NULL	Saprobic in soil and thus frequenctly isolated from soil and material contaminated with soil such as hay or rotten silage and spoil tips (Cannon & Kirk 2007)	Cannon PF, Kirk PM. 2007. Fungal Families of the World. CAB International, Cambridge	Purahong W, et al. 2016. Molecular Ecology 25:4059-4074
SH215928.07FU_GU910366_reps	6.0	27	Fungi	Ascomycota	Saprotroph-Symbiotroph	Dung Saprotroph-Endophyte-Undefined Saprotroph	Probable	Microfungus	NULL	Endophyte detection method-culture (David et al. 2016)	Tedersoo L, et al. 2014. Science 346:1256688	David AS, et al. 2016. Microbial Ecology 71:912-926
New.CleanUp.ReferenceOTU2284	0.0	3	Fungi	Basidiomycota	Saprotroph-Symbiotroph	Ectomycorrhizal-Undefined Saprotroph	Probable	Agaricoid	NULL	Ectomycorrhizal or saprobic, on the ground in woods, fields and moorland (Cannon & Kirk 2007)	Cannon PF, Kirk PM. 2007. Fungal Families of the World. CAB International, Cambridge
New.CleanUp.ReferenceOTU1028	0.0	3	Fungi	Ascomycota	Saprotroph-Symbiotroph	Ectomycorrhizal-Undefined Saprotroph	Probable	Microfungus	NULL	Many species are cellulolytic, occurring on paper, straw etc. Others are mycorrhizal associated with roots of Ericaceae and Epacridaceae (Cannon & Kirk 2007)	Cannon PF, Kirk PM. 2007. Fungal Families of the World. CAB International, Cambridge
SH185972.07FU_JN943800_refs	5.0	3	Fungi	Zygomycota	Saprotroph-Symbiotroph	Endophyte-Litter Saprotroph-Soil Saprotroph-Undefined Saprotroph	Possible	Microfungus	NULL	Saprobic in soil and thus frequenctly isolated from soil and material contaminated with soil such as hay or rotten silage and spoil tips (Cannon & Kirk 2007)	Cannon PF, Kirk PM. 2007. Fungal Families of the World. CAB International, Cambridge	Purahong W, et al. 2016. Molecular Ecology 25:4059-4074
New.CleanUp.ReferenceOTU4756	3.0	3	Fungi	Zygomycota	Saprotroph-Symbiotroph	Endophyte-Litter Saprotroph-Soil Saprotroph-Undefined Saprotroph	Possible	Microfungus	NULL	Saprobic in soil and thus frequenctly isolated from soil and material contaminated with soil such as hay or rotten silage and spoil tips (Cannon & Kirk 2007)	Cannon PF, Kirk PM. 2007. Fungal Families of the World. CAB International, Cambridge	Purahong W, et al. 2016. Molecular Ecology 25:4059-4074
New.CleanUp.ReferenceOTU15123	0.0	3	Fungi	Ascomycota	Saprotroph-Symbiotroph	Dung Saprotroph-Endophyte-Litter Saprotroph-Undefined Saprotroph	Possible	Microfungus	NULL	Endophyte detection method-culture (David et al. 2016)	Bell A. 1983. Dung Fungi: An Illustrated Guide to Coprophilous Fungi in New Zealand. Victoria University Press, Wellington	Tedersoo L, et al. 2014. Science 346:1256688	David AS, et al. 2016. Microbial Ecology 71:912-926	Purahong W, et al. 2016. Molecular Ecology 25:4059-4074 (as litter saprotroph)
New.CleanUp.ReferenceOTU16896	0.0	37	Fungi	Zygomycota	Saprotroph-Symbiotroph	Endophyte-Litter Saprotroph-Soil Saprotroph-Undefined Saprotroph	Possible	Microfungus	NULL	Saprobic in soil and thus frequenctly isolated from soil and material contaminated with soil such as hay or rotten silage and spoil tips (Cannon & Kirk 2007)	Cannon PF, Kirk PM. 2007. Fungal Families of the World. CAB International, Cambridge	Purahong W, et al. 2016. Molecular Ecology 25:4059-4074
New.CleanUp.ReferenceOTU8680	14.0	4	Fungi	Basidiomycota	Saprotroph-Symbiotroph	Ectomycorrhizal-Undefined Saprotroph	Probable	Agaricoid	NULL	Ectomycorrhizal or saprobic, on the ground in woods, fields and moorland (Cannon & Kirk 2007)	Cannon PF, Kirk PM. 2007. Fungal Families of the World. CAB International, Cambridge
New.CleanUp.ReferenceOTU14844	0.0	5	Fungi	Zygomycota	Saprotroph-Symbiotroph	Endophyte-Litter Saprotroph-Soil Saprotroph-Undefined Saprotroph	Possible	Microfungus	NULL	Saprobic in soil and thus frequenctly isolated from soil and material contaminated with soil such as hay or rotten silage and spoil tips (Cannon & Kirk 2007)	Cannon PF, Kirk PM. 2007. Fungal Families of the World. CAB International, Cambridge	Purahong W, et al. 2016. Molecular Ecology 25:4059-4074
New.ReferenceOTU209	255.0	628	Fungi	Zygomycota	Saprotroph-Symbiotroph	Endophyte-Litter Saprotroph-Soil Saprotroph-Undefined Saprotroph	Possible	Microfungus	NULL	Saprobic in soil and thus frequenctly isolated from soil and material contaminated with soil such as hay or rotten silage and spoil tips (Cannon & Kirk 2007)	Cannon PF, Kirk PM. 2007. Fungal Families of the World. CAB International, Cambridge	Purahong W, et al. 2016. Molecular Ecology 25:4059-4074
New.ReferenceOTU5	1.0	7	Fungi	Zygomycota	Saprotroph-Symbiotroph	Endophyte-Litter Saprotroph-Soil Saprotroph-Undefined Saprotroph	Possible	Microfungus	NULL	Saprobic in soil and thus frequenctly isolated from soil and material contaminated with soil such as hay or rotten silage and spoil tips (Cannon & Kirk 2007)	Cannon PF, Kirk PM. 2007. Fungal Families of the World. CAB International, Cambridge	Purahong W, et al. 2016. Molecular Ecology 25:4059-4074
New.CleanUp.ReferenceOTU1500	0.0	8	Fungi	Zygomycota	Saprotroph-Symbiotroph	Endophyte-Litter Saprotroph-Soil Saprotroph-Undefined Saprotroph	Possible	Microfungus	NULL	Saprobic in soil and thus frequenctly isolated from soil and material contaminated with soil such as hay or rotten silage and spoil tips (Cannon & Kirk 2007)	Cannon PF, Kirk PM. 2007. Fungal Families of the World. CAB International, Cambridge	Purahong W, et al. 2016. Molecular Ecology 25:4059-4074
New.CleanUp.ReferenceOTU15027	6.0	9	Fungi	Basidiomycota	Saprotroph-Symbiotroph	Lichenized-Undefined Saprotroph	Probable	Clavarioid	NULL	Most species are presumed saprobic on the ground or rotten wood, but many Multiclavula species are lichenized with green algae (Cannon & Kirk 2007)	Cannon PF, Kirk PM. 2007. Fungal Families of the World. CAB International, Cambridge
New.CleanUp.ReferenceOTU12274	70.0	98	Fungi	Zygomycota	Saprotroph-Symbiotroph	Endophyte-Litter Saprotroph-Soil Saprotroph-Undefined Saprotroph	Possible	Microfungus	NULL	Saprobic in soil and thus frequenctly isolated from soil and material contaminated with soil such as hay or rotten silage and spoil tips (Cannon & Kirk 2007)	Cannon PF, Kirk PM. 2007. Fungal Families of the World. CAB International, Cambridge	Purahong W, et al. 2016. Molecular Ecology 25:4059-4074
New.CleanUp.ReferenceOTU2163	0.0	1	Fungi	Basidiomycota	Symbiotroph	Ectomycorrhizal	Highly Probable	Agaricoid	NULL	NULL	Rinaldi AC, et al. 2008. Fungal Diversity 33:1-45	Tedersoo L, et al. 2010. Mycorrhiza 20:217-263	http://mycorrhizas.info/ecmf.html
New.CleanUp.ReferenceOTU81	3.0	1	Fungi	Basidiomycota	Symbiotroph	Ectomycorrhizal	Highly Probable	Cantherelloid	NULL	NULL	Tedersoo L, et al. 2014. Science 346:1256688
New.CleanUp.ReferenceOTU4942	65.0	1	Fungi	Ascomycota	Symbiotroph	Lichenized	Probable	Thallus	NULL	NULL	Tedersoo L, et al. 2014. Science 346:1256688
New.CleanUp.ReferenceOTU17102	50.0	1	Fungi	Ascomycota	Symbiotroph	Lichenized	Probable	Thallus	NULL	NULL	Tedersoo L, et al. 2014. Science 346:1256688
New.CleanUp.ReferenceOTU8628	0.0	1	Fungi	Glomeromycota	Symbiotroph	Arbuscular Mycorrhizal	Highly Probable	NULL	NULL	NULL	Redecker D, et al. 2013. Mycorrhiza 23:515-531
New.CleanUp.ReferenceOTU9619	0.0	1	Fungi	Glomeromycota	Symbiotroph	Arbuscular Mycorrhizal	Highly Probable	NULL	NULL	NULL	Redecker D, et al. 2013. Mycorrhiza 23:515-531
New.CleanUp.ReferenceOTU15232	0.0	1	Fungi	Glomeromycota	Symbiotroph	Arbuscular Mycorrhizal	Highly Probable	NULL	NULL	NULL	Redecker D, et al. 2013. Mycorrhiza 23:515-531
New.ReferenceOTU173	0.0	1	Fungi	Glomeromycota	Symbiotroph	Arbuscular Mycorrhizal	Highly Probable	NULL	NULL	NULL	Redecker D, et al. 2013. Mycorrhiza 23:515-531
New.CleanUp.ReferenceOTU2236	0.0	1	Fungi	Glomeromycota	Symbiotroph	Arbuscular Mycorrhizal	Highly Probable	NULL	NULL	NULL	Redecker D, et al. 2013. Mycorrhiza 23:515-531
New.ReferenceOTU142	0.0	1	Fungi	Ascomycota	Symbiotroph	Lichenized	Probable	Thallus	NULL	NULL	Tedersoo L, et al. 2014. Science 346:1256688
New.ReferenceOTU67	3.0	1	Fungi	Ascomycota	Symbiotroph	Lichenized	Highly Probable	Thallus	NULL	NULL	Esslinger TL. 2014. North Dakota State University (http://www.ndsu.edu/pubweb/~esslinge/chcklst/chcklst7.htm)
New.ReferenceOTU171	0.0	1	Fungi	Ascomycota	Symbiotroph	Endophyte	Highly Probable	Microfungus	NULL	Dark Septate Endophyte, known from plant roots.	Tedersoo L, et al. 2010. Mycorrhiza 20:217-263	Newsham 2011. New Phytologist 190:783-793 (as DSE)
New.CleanUp.ReferenceOTU15302	1.0	1	Fungi	Ascomycota	Symbiotroph	Endophyte	Probable	Microfungus	NULL	Endophyte detection method-culture (Busby et al. 2016, David et al. 2016)	Busby PE, et al. 2016. New Phytologist 209:1681-1692	David AS, et al. 2016. Microbial Ecology 71:912-926
New.CleanUp.ReferenceOTU4428	0.0	12	Fungi	Basidiomycota	Symbiotroph	Ectomycorrhizal	Highly Probable	Agaricoid	NULL	NULL	Rinaldi AC, et al. 2008. Fungal Diversity 33:1-45	Tedersoo L, et al. 2010. Mycorrhiza 20:217-263	http://mycorrhizas.info/ecmf.html
New.CleanUp.ReferenceOTU15280	0.0	125	Fungi	Basidiomycota	Symbiotroph	Ectomycorrhizal-Orchid Mycorrhizal-Root Associated Biotroph	Possible	NULL	NULL	NULL	Rinaldi AC, et al. 2008. Fungal Diversity 33:1-45	Tedersoo L, et al. 2010. Mycorrhiza 20:217-263 (pro parte)	http://mycorrhizas.info/ecmf.html	Weiss et al. doi: 10.1111/nph.13977 (many guilds)
New.ReferenceOTU169	2.0	14	Fungi	Glomeromycota	Symbiotroph	Arbuscular Mycorrhizal	Highly Probable	NULL	NULL	NULL	Redecker D, et al. 2013. Mycorrhiza 23:515-531
New.CleanUp.ReferenceOTU9574	0.0	14	Fungi	Ascomycota	Symbiotroph	Endophyte	Highly Probable	NULL	NULL	Dark Septate Endophyte, known from plant roots.	Jumpponen A, Trappe J. 1998. New Phytologist 140:295-310 (as DSE)	Taylor DL, et al. 2014. Ecological Monographs 84:3-20.
New.CleanUp.ReferenceOTU11156	0.0	2	Fungi	Glomeromycota	Symbiotroph	Arbuscular Mycorrhizal	Highly Probable	NULL	NULL	NULL	Redecker D, et al. 2013. Mycorrhiza 23:515-531
New.CleanUp.ReferenceOTU16355	0.0	2	Fungi	Glomeromycota	Symbiotroph	Arbuscular Mycorrhizal	Highly Probable	NULL	NULL	NULL	Redecker D, et al. 2013. Mycorrhiza 23:515-531
New.ReferenceOTU195	7.0	3	Fungi	Ascomycota	Symbiotroph	Endophyte	Probable	Microfungus	NULL	Endophyte detection method-culture (Hanada et al. 2008)	Hanada RE, et al. 2008. Mycological Research 112:1335-1343
New.CleanUp.ReferenceOTU10452	17.0	34	Fungi	Ascomycota	Symbiotroph	Endophyte	Highly Probable	NULL	NULL	Dark Septate Endophyte, known from plant roots.	Newsham 2011. New Phytologist 190:783-793 (as DSE)
New.CleanUp.ReferenceOTU13446	1.0	34	Fungi	Ascomycota	Symbiotroph	Endophyte	Highly Probable	NULL	NULL	Dark Septate Endophyte, known from plant roots.	Newsham 2011. New Phytologist 190:783-793 (as DSE)
New.CleanUp.ReferenceOTU9836	4.0	4	Fungi	Basidiomycota	Symbiotroph	Ectomycorrhizal	Highly Probable	Cantherelloid	NULL	NULL	Tedersoo L, et al. 2014. Science 346:1256688
New.ReferenceOTU6	0.0	4	Fungi	Glomeromycota	Symbiotroph	Arbuscular Mycorrhizal	Highly Probable	NULL	NULL	NULL	Redecker D, et al. 2013. Mycorrhiza 23:515-531
New.CleanUp.ReferenceOTU14261	0.0	4	Fungi	Ascomycota	Symbiotroph	Ectomycorrhizal	Highly Probable	NULL	NULL	NULL	Tedersoo L, et al. 2014. Science 346:1256688
New.CleanUp.ReferenceOTU6098	1.0	44	Fungi	Basidiomycota	Symbiotroph	Ectomycorrhizal	Highly Probable	Agaricoid	NULL	NULL	Rinaldi AC, et al. 2008. Fungal Diversity 33:1-45	Tedersoo L, et al. 2010. Mycorrhiza 20:217-263	http://mycorrhizas.info/ecmf.html
New.ReferenceOTU99	49.0	48	Fungi	Ascomycota	Symbiotroph	Endophyte	Highly Probable	Microfungus	NULL	Endophyte detection method-culture (David et al. 2016)	David AS, et al. 2016. Microbial Ecology 71:912-926
New.CleanUp.ReferenceOTU13191	1.0	49	Fungi	Ascomycota	Symbiotroph	Endophyte	Highly Probable	Microfungus	NULL	Dark Septate Endophyte, known from plant roots.	Tedersoo L, et al. 2010. Mycorrhiza 20:217-263	Newsham 2011. New Phytologist 190:783-793 (as DSE)
New.CleanUp.ReferenceOTU13099	24.0	5	Fungi	Ascomycota	Symbiotroph	Lichenized	Highly Probable	Thallus	NULL	NULL	Esslinger TL. 2014. North Dakota State University (http://www.ndsu.edu/pubweb/~esslinge/chcklst/chcklst7.htm)
New.ReferenceOTU68	9.0	5	Fungi	Ascomycota	Symbiotroph	Lichenized	Highly Probable	Thallus	NULL	NULL	Esslinger TL. 2014. North Dakota State University (http://www.ndsu.edu/pubweb/~esslinge/chcklst/chcklst7.htm)
New.CleanUp.ReferenceOTU9183	0.0	6	Fungi	Glomeromycota	Symbiotroph	Arbuscular Mycorrhizal	Highly Probable	NULL	NULL	NULL	Redecker D, et al. 2013. Mycorrhiza 23:515-531
New.CleanUp.ReferenceOTU4034	1.0	6	Fungi	Glomeromycota	Symbiotroph	Arbuscular Mycorrhizal	Highly Probable	NULL	NULL	NULL	Redecker D, et al. 2013. Mycorrhiza 23:515-531
New.CleanUp.ReferenceOTU7657	22.0	6	Fungi	Ascomycota	Symbiotroph	Lichenized	Highly Probable	Thallus	NULL	NULL	Esslinger TL. 2014. North Dakota State University (http://www.ndsu.edu/pubweb/~esslinge/chcklst/chcklst7.htm)
New.CleanUp.ReferenceOTU1367	0.0	8	Fungi	Basidiomycota	Symbiotroph	Ectomycorrhizal	Highly Probable	Cantherelloid	NULL	NULL	Tedersoo L, et al. 2014. Science 346:1256688

## Sheet: Grassland_Fungild
OTU ID	AS1	GWS	taxonomy	Taxon	Citation/Source
SH527845.07FU_KM265891_reps	20.0	103	Fungi	Ascomycota	Pathotroph	Plant Pathogen	Probable	NULL	NULL	NULL	Tedersoo L, et al. 2014. Science 346:1256688
SH216250.07FU_EF679363_refs	24.0	146	Fungi	Ascomycota	Pathotroph	Plant Pathogen	Probable	Microfungus	NULL	NULL	Tedersoo L, et al. 2014. Science 346:1256688
New.ReferenceOTU198	0.0	196	Fungi	Ascomycota	Pathotroph	Plant Pathogen	Probable	Microfungus	NULL	Species in this family cause rice blast and take-all	Usually necrotrophic on roots (Cannon & Kirk 2007)	Cannon PF, Kirk PM. 2007. Fungal Families of the World. CAB International, Cambridge
New.ReferenceOTU63	639.0	290	Fungi	Ascomycota	Pathotroph	Animal Pathogen	Probable	NULL	NULL	NULL	Tedersoo L, et al. 2014. Science 346:1256688
New.CleanUp.ReferenceOTU4556	0.0	4	Fungi	Zygomycota	Pathotroph	Fungal Parasite	Probable	NULL	NULL	NULL	Tedersoo L, et al. 2014. Science 346:1256688
New.ReferenceOTU167	19.0	613	Fungi	Ascomycota	Pathotroph	Plant Pathogen	Probable	NULL	NULL	NULL	Tedersoo L, et al. 2014. Science 346:1256688
New.ReferenceOTU200	11.0	74	Fungi	Ascomycota	Pathotroph	Animal Pathogen	Probable	NULL	NULL	NULL	Tedersoo L, et al. 2014. Science 346:1256688
New.ReferenceOTU19	0.0	8	Fungi	Ascomycota	Pathotroph	EndophyteunassignedPlant Pathogen	Possible	NULL	NULL	Host - Asteraceae	Costa IPMW, et al. 2012. Mycotaxon 119:26
New.CleanUp.ReferenceOTU9665	2.0	862	Fungi	Ascomycota	Pathotroph	Animal Pathogen	Probable	NULL	NULL	NULL	Tedersoo L, et al. 2014. Science 346:1256688
New.CleanUp.ReferenceOTU4552	8.0	1	Fungi	Ascomycota	PathotrophunassignedSaprotroph	EndophyteunassignedLichen ParasiteunassignedPlant PathogenunassignedUndefined Saprotroph	Probable	Microfungus	NULL	Necrotrophic pathogens and saprobes, especially associated with grasses. Many species are seed-borne (Cannon & Kirk 2007)	Cannon PF, Kirk PM. 2007. Fungal Families of the World. CAB International, Cambridge	David AS, et al. 2016. Microbial Ecology 71:912-926	Lawrey JD, Diederich P. 2016. URL: http://www.lichenicolous.net [24 May 2017]
New.ReferenceOTU30	0.0	36	Fungi	Ascomycota	PathotrophunassignedSaprotroph	NULL	Probable	Facultative Yeast-Microfungus	NULL	NULL	Kurtzman CP, et al. (eds.) 2011. The Yeasts, a Taxonomic Study. Fifth Edition. Vols 1-3. Elsevier, San Diego
New.CleanUp.ReferenceOTU3135	1.0	58	Fungi	Basidiomycota	PathotrophunassignedSaprotroph	Animal PathogenunassignedUndefined Saprotroph	Probable	Facultative Yeast	NULL	A lipid-dependent fungus growing on the sebaceous areas of human skin that may cause or exacerbate several skin diseases (Pityrosporum is a synonym that has been used for the yeast forms)	Findley K, et al. 2013. Nature 498:367-370
New.ReferenceOTU49	18.0	8	Fungi	Ascomycota	PathotrophunassignedSaprotroph	Animal PathogenunassignedPlant PathogenunassignedUndefined Saprotroph	Possible	Microfungus	NULL	NULL	Tedersoo L, et al. 2014. Science 346:1256688 (doi:10.1126/science.1256688)
New.ReferenceOTU180	109.0	1	Fungi	Ascomycota	PathotrophunassignedSaprotrophunassignedSymbiotroph	Animal PathogenunassignedDung SaprotrophunassignedEndophyteunassignedLichen ParasiteunassignedPlant PathogenunassignedUndefined Saprotroph	Possible	Microfungus	NULL	NULL	Bell A. 1983. Dung Fungi: An Illustrated Guide to Coprophilous Fungi in New Zealand. Victoria University Press, Wellington	Damm U, et al. 2010. Persoonia 24:60-80	Costa IPMW, et al. 2012. Mycotaxon 119:26	Tedersoo L, et al. 2014. Science 346:1256688 (doi:10.1126/science.1256688)	Irinyi L, et al. 2015. Medical Mycology 53:313-337	Lawrey JD, Diederich P. 2016. URL: http://www.lichenicolous.net [24 May 2017]
New.CleanUp.ReferenceOTU4518	1.0	1	Fungi	Basidiomycota	PathotrophunassignedSaprotrophunassignedSymbiotroph	Fungal ParasiteunassignedUndefined Saprotroph	Possible	Tremelloid-Yeast	NULL	The order contains both teleomorphic and anamorphic species, most of the latter being yeasts	Sterkenburg E, et al. 2015. New Phytologist 207:1145-1158
New.ReferenceOTU40	0.0	1	Fungi	Zygomycota	PathotrophunassignedSaprotrophunassignedSymbiotroph	Animal EndosymbiontunassignedAnimal PathogenunassignedUndefined Saprotroph	Probable	Microfungus	NULL	Basidiobolus ranarum is commonly present in decaying fruit and vegetable matter, and as a commensal in the intestinal tract of frogs, toads, and lizards - Cause of subcutaneous zygomycosis in humans (Cannon & Kirk 2007)	Cannon PF, Kirk PM. 2007. Fungal Families of the World. CAB International, Cambridge
New.CleanUp.ReferenceOTU15543	0.0	10	Fungi	Basidiomycota	PathotrophunassignedSaprotrophunassignedSymbiotroph	EctomycorrhizalunassignedFungal ParasiteunassignedSoil SaprotrophunassignedUndefined Saprotroph	Possible	Agaricoid	NULL	NULL	Rinaldi AC, et al. 2008. Fungal Diversity 33:1-45 (ECM/(not ECM)	Tedersoo L, et al. 2010. Mycorrhiza 20:217-263 (sensu stricto)	http://mycorrhizas.info/ecmf.html (ECM/(not ECM)
New.CleanUp.ReferenceOTU106	0.0	114	Fungi	Basidiomycota	PathotrophunassignedSaprotrophunassignedSymbiotroph	Fungal ParasiteunassignedUndefined Saprotroph	Possible	Tremelloid-Yeast	NULL	The order contains both teleomorphic and anamorphic species, most of the latter being yeasts	Sterkenburg E, et al. 2015. New Phytologist 207:1145-1158
New.CleanUp.ReferenceOTU5260	117.0	117	Fungi	Ascomycota	PathotrophunassignedSaprotrophunassignedSymbiotroph	Animal PathogenunassignedEndophyteunassignedLichen ParasiteunassignedPlant PathogenunassignedSoil SaprotrophunassignedWood Saprotroph	Possible	Microfungus	NULL	Likely opportunistic human pathogen (Irinyi et al. 2015)	Duncan CG, Eslyn WE. 1966. Mycologia 58:642-664	Seehann G, et al. 1975. List of Fungi in Soft-Rot Tissue Tests. Institute fur Holzbiologie und Holzschutz, Bundesforschungsanstalt fur Forst - und Holzwirtshaft, Hamburg - Lohbrugge, Germany	Costa IPMW, et al. 2012. Mycotaxon 119:26	Tedersoo L, et al. 2014. Science 346:1256688	Irinyi L, et al. 2015. Medical Mycology 53:313-337	Schroers et al. 2016. Mycologia 108:806-819	http://www.apsnet.org/publications/commonnames/Pages/default.aspx	Lawrey JD, Diederich P. 2016. URL: http://www.lichenicolous.net [24 May 2017]
New.CleanUp.ReferenceOTU2570	2.0	118	Fungi	Ascomycota	PathotrophunassignedSaprotrophunassignedSymbiotroph	Animal PathogenunassignedDung SaprotrophunassignedEndophyteunassignedEpiphyteunassignedPlant SaprotrophunassignedWood Saprotroph	Possible	Microfungus	Soft Rot	Saprobic, acting as key decay organisms of plant materials and plant-derived commodities (Cannon & Kirk 2007)	Epiphyte detection method-culture (Massimo et al. 2015)	Endophyte detection method-culture (Busby et al. 2016, David et al. 2016)	Likely opportunistic human pathogen (Irinyi et al. 2015)	Seehann G, et al. 1975. List of Fungi in Soft-Rot Tissue Tests. Institute fur Holzbiologie und Holzschutz, Bundesforschungsanstalt fur Forst - und Holzwirtshaft, Hamburg - Lohbrugge, Germany	Cannon PF, Kirk PM. 2007. Fungal Families of the World. CAB International, Cambridge	Bills GF, et al. 2013. Current Opinion in microbiology, 16:549-565	Tedersoo L, et al. 2014. Science 346:1256688	Irinyi L, et al. 2015. Medical Mycology 53:313-337	Massimo NC, et al. 2015. Microbial Ecology 70:61-76	Busby PE, et al. 2016. New Phytologist 209:1681-1692	David AS, et al. 2016. Microbial Ecology 71:912-926
New.CleanUp.ReferenceOTU4817	0.0	163	Fungi	Zygomycota	PathotrophunassignedSaprotrophunassignedSymbiotroph	Animal EndosymbiontunassignedAnimal PathogenunassignedUndefined Saprotroph	Probable	Microfungus	NULL	Basidiobolus ranarum is commonly present in decaying fruit and vegetable matter, and as a commensal in the intestinal tract of frogs, toads, and lizards - Cause of subcutaneous zygomycosis in humans (Cannon & Kirk 2007)	Cannon PF, Kirk PM. 2007. Fungal Families of the World. CAB International, Cambridge
New.CleanUp.ReferenceOTU15410	0.0	19	Fungi	Basidiomycota	PathotrophunassignedSaprotrophunassignedSymbiotroph	EctomycorrhizalunassignedLichen ParasiteunassignedLichenizedunassignedPlant Pathogen	Possible	Corticioid	NULL	Many species form ectomycorrhizal associations, often occupying a dominant position in mycorrhizal communities. Other species are pathogens of many different plants and even lichens, and one species has even been suggested to form a lichen association with cyanobacteria. Yet more species are sparse and active decomposers, and a few are aquatic (Cannon & Kirk 2007)	Cannon PF, Kirk PM. 2007. Fungal Families of the World. CAB International, Cambridge
New.CleanUp.ReferenceOTU11960	3.0	2	Fungi	Ascomycota	PathotrophunassignedSaprotrophunassignedSymbiotroph	Animal PathogenunassignedEndophyteunassignedPlant PathogenunassignedWood Saprotroph	Possible	Microfungus	Soft Rot	NULL	Duncan CG, Eslyn WE. 1966. Mycologia 58:642-664	Seehann G, et al. 1975. List of Fungi in Soft-Rot Tissue Tests. Institute fur Holzbiologie und Holzschutz, Bundesforschungsanstalt fur Forst - und Holzwirtshaft, Hamburg - Lohbrugge, Germany	Tedersoo L, et al. 2014. Science 346:125688
New.ReferenceOTU21	7.0	2	Fungi	Zygomycota	PathotrophunassignedSaprotrophunassignedSymbiotroph	Animal EndosymbiontunassignedAnimal PathogenunassignedUndefined Saprotroph	Probable	Microfungus	NULL	Basidiobolus ranarum is commonly present in decaying fruit and vegetable matter, and as a commensal in the intestinal tract of frogs, toads, and lizards - Cause of subcutaneous zygomycosis in humans (Cannon & Kirk 2007)	Cannon PF, Kirk PM. 2007. Fungal Families of the World. CAB International, Cambridge
New.CleanUp.ReferenceOTU2615	0.0	25	Fungi	Ascomycota	PathotrophunassignedSaprotrophunassignedSymbiotroph	Animal PathogenunassignedEndophyteunassignedLichen ParasiteunassignedPlant PathogenunassignedSoil SaprotrophunassignedWood Saprotroph	Possible	Microfungus	NULL	Likely opportunistic human pathogen (Irinyi et al. 2015)	Duncan CG, Eslyn WE. 1966. Mycologia 58:642-664	Seehann G, et al. 1975. List of Fungi in Soft-Rot Tissue Tests. Institute fur Holzbiologie und Holzschutz, Bundesforschungsanstalt fur Forst - und Holzwirtshaft, Hamburg - Lohbrugge, Germany	Costa IPMW, et al. 2012. Mycotaxon 119:26	Tedersoo L, et al. 2014. Science 346:1256688	Irinyi L, et al. 2015. Medical Mycology 53:313-337	Schroers et al. 2016. Mycologia 108:806-819	http://www.apsnet.org/publications/commonnames/Pages/default.aspx	Lawrey JD, Diederich P. 2016. URL: http://www.lichenicolous.net [24 May 2017]
New.CleanUp.ReferenceOTU15649	0.0	26	Fungi	Basidiomycota	PathotrophunassignedSaprotrophunassignedSymbiotroph	EctomycorrhizalunassignedLichen ParasiteunassignedLichenizedunassignedPlant Pathogen	Possible	Corticioid	NULL	Many species form ectomycorrhizal associations, often occupying a dominant position in mycorrhizal communities. Other species are pathogens of many different plants and even lichens, and one species has even been suggested to form a lichen association with cyanobacteria. Yet more species are sparse and active decomposers, and a few are aquatic (Cannon & Kirk 2007)	Cannon PF, Kirk PM. 2007. Fungal Families of the World. CAB International, Cambridge
New.CleanUp.ReferenceOTU5284	0.0	26	Fungi	Basidiomycota	PathotrophunassignedSaprotrophunassignedSymbiotroph	Fungal ParasiteunassignedUndefined Saprotroph	Possible	Tremelloid-Yeast	NULL	The order contains both teleomorphic and anamorphic species, most of the latter being yeasts	Sterkenburg E, et al. 2015. New Phytologist 207:1145-1158
SH204422.07FU_KF528003_reps	518.0	283	Fungi	Ascomycota	PathotrophunassignedSaprotrophunassignedSymbiotroph	Animal PathogenunassignedEndophyteunassignedLichen ParasiteunassignedPlant PathogenunassignedSoil SaprotrophunassignedWood Saprotroph	Possible	Microfungus	NULL	Likely opportunistic human pathogen (Irinyi et al. 2015)	Duncan CG, Eslyn WE. 1966. Mycologia 58:642-664	Seehann G, et al. 1975. List of Fungi in Soft-Rot Tissue Tests. Institute fur Holzbiologie und Holzschutz, Bundesforschungsanstalt fur Forst - und Holzwirtshaft, Hamburg - Lohbrugge, Germany	Costa IPMW, et al. 2012. Mycotaxon 119:26	Tedersoo L, et al. 2014. Science 346:1256688	Irinyi L, et al. 2015. Medical Mycology 53:313-337	Schroers et al. 2016. Mycologia 108:806-819	http://www.apsnet.org/publications/commonnames/Pages/default.aspx	Lawrey JD, Diederich P. 2016. URL: http://www.lichenicolous.net [24 May 2017]
New.CleanUp.ReferenceOTU9185	0.0	29	Fungi	Basidiomycota	PathotrophunassignedSaprotrophunassignedSymbiotroph	EctomycorrhizalunassignedFungal ParasiteunassignedSoil SaprotrophunassignedUndefined Saprotroph	Possible	Agaricoid	NULL	NULL	Rinaldi AC, et al. 2008. Fungal Diversity 33:1-45 (ECM/(not ECM)	Tedersoo L, et al. 2010. Mycorrhiza 20:217-263 (sensu stricto)	http://mycorrhizas.info/ecmf.html (ECM/(not ECM)
New.CleanUp.ReferenceOTU632	36.0	34	Fungi	Ascomycota	PathotrophunassignedSaprotrophunassignedSymbiotroph	Animal PathogenunassignedDung SaprotrophunassignedEndophyteunassignedPlant SaprotrophunassignedSoil SaprotrophunassignedWood Saprotroph	Probable	Microfungus	Soft Rot	Reported in soils (including agricultural) as saprotrophs on dung or plant material, or in roots as endophytes, while some species are associated with human and animal opportunistic diseases (Carmaran et al.2015)	Seehann G, et al. 1975. List of Fungi in Soft-Rot Tissue Tests. Institute fur Holzbiologie und Holzschutz, Bundesforschungsanstalt fur Forst - und Holzwirtshaft, Hamburg - Lohbrugge, Germany	Carmaran CC, et al.2015. Mycological Progress 14:94	Irinyi L, et al. 2015. Medical Mycology 53:313-337
New.CleanUp.ReferenceOTU3079	0.0	34	Fungi	Basidiomycota	PathotrophunassignedSaprotrophunassignedSymbiotroph	Fungal ParasiteunassignedUndefined Saprotroph	Possible	Tremelloid-Yeast	NULL	The order contains both teleomorphic and anamorphic species, most of the latter being yeasts	Sterkenburg E, et al. 2015. New Phytologist 207:1145-1158
New.CleanUp.ReferenceOTU7400	0.0	36	Fungi	Zygomycota	PathotrophunassignedSaprotrophunassignedSymbiotroph	Animal EndosymbiontunassignedAnimal PathogenunassignedUndefined Saprotroph	Probable	Microfungus	NULL	Basidiobolus ranarum is commonly present in decaying fruit and vegetable matter, and as a commensal in the intestinal tract of frogs, toads, and lizards - Cause of subcutaneous zygomycosis in humans (Cannon & Kirk 2007)	Cannon PF, Kirk PM. 2007. Fungal Families of the World. CAB International, Cambridge
New.CleanUp.ReferenceOTU891	0.0	38	Fungi	Zygomycota	PathotrophunassignedSaprotrophunassignedSymbiotroph	Animal EndosymbiontunassignedAnimal PathogenunassignedUndefined Saprotroph	Probable	Microfungus	NULL	Basidiobolus ranarum is commonly present in decaying fruit and vegetable matter, and as a commensal in the intestinal tract of frogs, toads, and lizards - Cause of subcutaneous zygomycosis in humans (Cannon & Kirk 2007)	Cannon PF, Kirk PM. 2007. Fungal Families of the World. CAB International, Cambridge
New.CleanUp.ReferenceOTU6758	4.0	407	Fungi	Ascomycota	PathotrophunassignedSaprotrophunassignedSymbiotroph	Animal PathogenunassignedEndophyteunassignedLichen ParasiteunassignedPlant PathogenunassignedSoil SaprotrophunassignedWood Saprotroph	Possible	Microfungus	NULL	Likely opportunistic human pathogen (Irinyi et al. 2015)	Duncan CG, Eslyn WE. 1966. Mycologia 58:642-664	Seehann G, et al. 1975. List of Fungi in Soft-Rot Tissue Tests. Institute fur Holzbiologie und Holzschutz, Bundesforschungsanstalt fur Forst - und Holzwirtshaft, Hamburg - Lohbrugge, Germany	Costa IPMW, et al. 2012. Mycotaxon 119:26	Tedersoo L, et al. 2014. Science 346:1256688	Irinyi L, et al. 2015. Medical Mycology 53:313-337	Schroers et al. 2016. Mycologia 108:806-819	http://www.apsnet.org/publications/commonnames/Pages/default.aspx	Lawrey JD, Diederich P. 2016. URL: http://www.lichenicolous.net [24 May 2017]
New.CleanUp.ReferenceOTU2061	0.0	41	Fungi	Basidiomycota	PathotrophunassignedSaprotrophunassignedSymbiotroph	Fungal ParasiteunassignedUndefined Saprotroph	Possible	Tremelloid-Yeast	NULL	The order contains both teleomorphic and anamorphic species, most of the latter being yeasts	Sterkenburg E, et al. 2015. New Phytologist 207:1145-1158
New.ReferenceOTU94	701.0	4172	Fungi	Basidiomycota	PathotrophunassignedSaprotrophunassignedSymbiotroph	Fungal ParasiteunassignedUndefined Saprotroph	Possible	Tremelloid-Yeast	NULL	The order contains both teleomorphic and anamorphic species, most of the latter being yeasts	Sterkenburg E, et al. 2015. New Phytologist 207:1145-1158
New.CleanUp.ReferenceOTU4082	0.0	48	Fungi	Basidiomycota	PathotrophunassignedSaprotrophunassignedSymbiotroph	Fungal ParasiteunassignedUndefined Saprotroph	Possible	Tremelloid-Yeast	NULL	The order contains both teleomorphic and anamorphic species, most of the latter being yeasts	Sterkenburg E, et al. 2015. New Phytologist 207:1145-1158
New.CleanUp.ReferenceOTU8960	9.0	489	Fungi	Ascomycota	PathotrophunassignedSaprotrophunassignedSymbiotroph	EndophyteunassignedLichen ParasiteunassignedUndefined Saprotroph	Possible	Microfungus	NULL	NULL	Tedersoo L, et al. 2014. Science 346:1256688	Massimo NC, et al. 2015. Microbial Ecology 70:61-76	Lawrey JD, Diederich P. 2016. URL: http://www.lichenicolous.net [24 May 2017]
New.CleanUp.ReferenceOTU1158	0.0	5	Fungi	Ascomycota	PathotrophunassignedSaprotrophunassignedSymbiotroph	Animal PathogenunassignedEndophyteunassignedPlant PathogenunassignedUndefined Saprotroph	Possible	Microfungus	NULL	Saprobic in soil or rotting vegetation, some species heat-tolerant and associatated with silage and compost, a few associated with humans and animals (Cannon & Kirk 2007)	Cannon PF, Kirk PM. 2007. Fungal Families of the World. CAB International, Cambridge
New.CleanUp.ReferenceOTU14804	0.0	50	Fungi	Zygomycota	PathotrophunassignedSaprotrophunassignedSymbiotroph	Animal EndosymbiontunassignedAnimal PathogenunassignedUndefined Saprotroph	Probable	Microfungus	NULL	Basidiobolus ranarum is commonly present in decaying fruit and vegetable matter, and as a commensal in the intestinal tract of frogs, toads, and lizards - Cause of subcutaneous zygomycosis in humans (Cannon & Kirk 2007)	Cannon PF, Kirk PM. 2007. Fungal Families of the World. CAB International, Cambridge
New.CleanUp.ReferenceOTU13751	0.0	520	Fungi	Ascomycota	PathotrophunassignedSaprotrophunassignedSymbiotroph	Animal PathogenunassignedEndophyteunassignedFungal ParasiteunassignedLichen ParasiteunassignedPlant PathogenunassignedWood Saprotroph	Possible	Microfungus	NULL	NULL	Hirooka Y, et al. 2012. Studies in Mycology 71:1-210	Tedersoo L, et al. 2014. Science 346:1256688
New.CleanUp.ReferenceOTU4066	0.0	54	Fungi	Zygomycota	PathotrophunassignedSaprotrophunassignedSymbiotroph	Animal EndosymbiontunassignedAnimal PathogenunassignedUndefined Saprotroph	Probable	Microfungus	NULL	Basidiobolus ranarum is commonly present in decaying fruit and vegetable matter, and as a commensal in the intestinal tract of frogs, toads, and lizards - Cause of subcutaneous zygomycosis in humans (Cannon & Kirk 2007)	Cannon PF, Kirk PM. 2007. Fungal Families of the World. CAB International, Cambridge
New.CleanUp.ReferenceOTU2082	0.0	56	Fungi	Basidiomycota	PathotrophunassignedSaprotrophunassignedSymbiotroph	EctomycorrhizalunassignedFungal ParasiteunassignedSoil SaprotrophunassignedUndefined Saprotroph	Possible	Agaricoid	NULL	NULL	Rinaldi AC, et al. 2008. Fungal Diversity 33:1-45 (ECM/(not ECM)	Tedersoo L, et al. 2010. Mycorrhiza 20:217-263 (sensu stricto)	http://mycorrhizas.info/ecmf.html (ECM/(not ECM)
New.ReferenceOTU23	56.0	56	Fungi	Ascomycota	PathotrophunassignedSaprotrophunassignedSymbiotroph	Animal PathogenunassignedEndophyteunassignedLichen ParasiteunassignedPlant PathogenunassignedSoil SaprotrophunassignedWood Saprotroph	Possible	Microfungus	NULL	Likely opportunistic human pathogen (Irinyi et al. 2015)	Duncan CG, Eslyn WE. 1966. Mycologia 58:642-664	Seehann G, et al. 1975. List of Fungi in Soft-Rot Tissue Tests. Institute fur Holzbiologie und Holzschutz, Bundesforschungsanstalt fur Forst - und Holzwirtshaft, Hamburg - Lohbrugge, Germany	Costa IPMW, et al. 2012. Mycotaxon 119:26	Tedersoo L, et al. 2014. Science 346:1256688	Irinyi L, et al. 2015. Medical Mycology 53:313-337	Schroers et al. 2016. Mycologia 108:806-819	http://www.apsnet.org/publications/commonnames/Pages/default.aspx	Lawrey JD, Diederich P. 2016. URL: http://www.lichenicolous.net [24 May 2017]
New.ReferenceOTU227	116.0	65	Fungi	Ascomycota	PathotrophunassignedSaprotrophunassignedSymbiotroph	Animal PathogenunassignedDung SaprotrophunassignedEndophyteunassignedEpiphyteunassignedPlant SaprotrophunassignedWood Saprotroph	Possible	Microfungus	Soft Rot	Saprobic, acting as key decay organisms of plant materials and plant-derived commodities (Cannon & Kirk 2007)	Epiphyte detection method-culture (Massimo et al. 2015)	Endophyte detection method-culture (Busby et al. 2016, David et al. 2016)	Likely opportunistic human pathogen (Irinyi et al. 2015)	Seehann G, et al. 1975. List of Fungi in Soft-Rot Tissue Tests. Institute fur Holzbiologie und Holzschutz, Bundesforschungsanstalt fur Forst - und Holzwirtshaft, Hamburg - Lohbrugge, Germany	Cannon PF, Kirk PM. 2007. Fungal Families of the World. CAB International, Cambridge	Bills GF, et al. 2013. Current Opinion in microbiology, 16:549-565	Tedersoo L, et al. 2014. Science 346:1256688	Irinyi L, et al. 2015. Medical Mycology 53:313-337	Massimo NC, et al. 2015. Microbial Ecology 70:61-76	Busby PE, et al. 2016. New Phytologist 209:1681-1692	David AS, et al. 2016. Microbial Ecology 71:912-926
New.CleanUp.ReferenceOTU12293	23.0	71	Fungi	Basidiomycota	PathotrophunassignedSaprotrophunassignedSymbiotroph	Fungal ParasiteunassignedUndefined Saprotroph	Possible	Tremelloid-Yeast	NULL	The order contains both teleomorphic and anamorphic species, most of the latter being yeasts	Sterkenburg E, et al. 2015. New Phytologist 207:1145-1158
New.CleanUp.ReferenceOTU15828	0.0	8	Fungi	Ascomycota	PathotrophunassignedSaprotrophunassignedSymbiotroph	Animal PathogenunassignedEndophyteunassignedPlant PathogenunassignedUndefined Saprotroph	Possible	Microfungus	NULL	Saprobic in soil or rotting vegetation, some species heat-tolerant and associatated with silage and compost, a few associated with humans and animals (Cannon & Kirk 2007)	Cannon PF, Kirk PM. 2007. Fungal Families of the World. CAB International, Cambridge
New.CleanUp.ReferenceOTU3605	0.0	80	Fungi	Ascomycota	PathotrophunassignedSaprotrophunassignedSymbiotroph	EndophyteunassignedLichen ParasiteunassignedWood Saprotroph	Highly Probable	Microfungus	Soft Rot	Endophyte Host - Caryophyllaceae (Costa et al. 2012)	Seehann G, et al. 1975. List of Fungi in Soft-Rot Tissue Tests. Institute fur Holzbiologie und Holzschutz, Bundesforschungsanstalt fur Forst - und Holzwirtshaft, Hamburg - Lohbrugge, Germany	Costa IPMW, et al. 2012. Mycotaxon 119:26	Lawrey JD, Diederich P. 2016. URL: http://www.lichenicolous.net [24 May 2017]
New.CleanUp.ReferenceOTU8793	0.0	82	Fungi	Zygomycota	PathotrophunassignedSaprotrophunassignedSymbiotroph	Animal EndosymbiontunassignedAnimal PathogenunassignedUndefined Saprotroph	Probable	Microfungus	NULL	Basidiobolus ranarum is commonly present in decaying fruit and vegetable matter, and as a commensal in the intestinal tract of frogs, toads, and lizards - Cause of subcutaneous zygomycosis in humans (Cannon & Kirk 2007)	Cannon PF, Kirk PM. 2007. Fungal Families of the World. CAB International, Cambridge
New.CleanUp.ReferenceOTU15191	0.0	149	Fungi	Ascomycota	PathotrophunassignedSymbiotroph	Animal PathogenunassignedClavicipitaceous EndophyteunassignedFungal Parasite	Possible	NULL	NULL	Endophyte detection method-culture (Gazis et al. 2014)	Gazis R, et al. 2014. Mycologia 106:1090-105	Tedersoo L, et al. 2014. Science 346:1256688	Quant CA. 2014. IMA Fungus. 5: 121-134
New.CleanUp.ReferenceOTU1657	0.0	42	Fungi	Ascomycota	PathotrophunassignedSymbiotroph	Animal PathogenunassignedClavicipitaceous EndophyteunassignedFungal Parasite	Possible	NULL	NULL	Endophyte detection method-culture (Gazis et al. 2014)	Gazis R, et al. 2014. Mycologia 106:1090-105	Tedersoo L, et al. 2014. Science 346:1256688	Quant CA. 2014. IMA Fungus. 5: 121-134
New.CleanUp.ReferenceOTU3981	0.0	1	Fungi	Ascomycota	Saprotroph	Undefined Saprotroph	Possible	Microfungus	NULL	NULL	Sterkenburg E, et al. 2015. New Phytologist 207:1145-1158
New.CleanUp.ReferenceOTU17023	1.0	1	Fungi	Ascomycota	Saprotroph	Dung SaprotrophunassignedUndefined Saprotroph	Highly Probable	NULL	NULL	NULL	Bills GF, et al. 2013. Current Opinion in microbiology, 16:549-565	Tedersoo L, et al. 2014. Science 346:1256688
New.CleanUp.ReferenceOTU17230	1.0	1	Fungi	Ascomycota	Saprotroph	Undefined Saprotroph	Possible	Microfungus	NULL	NULL	Sterkenburg E, et al. 2015. New Phytologist 207:1145-1158
New.CleanUp.ReferenceOTU14690	0.0	10	Fungi	Basidiomycota	Saprotroph	Soil Saprotroph	Possible	Microfungus	NULL	From forest soil (Calduch et al. 2002)	Calduch M, et al. 2002. Mycologia 94:355-361
New.ReferenceOTU213	261.0	11	Fungi	Ascomycota	Saprotroph	Undefined Saprotroph	Probable	Facultative Yeast	NULL	NULL	James TY, et al. 2006. Nature 443:818-822
New.CleanUp.ReferenceOTU858	0.0	11	Fungi	Ascomycota	Saprotroph	Undefined Saprotroph	Possible	Microfungus	NULL	NULL	Sterkenburg E, et al. 2015. New Phytologist 207:1145-1158
New.CleanUp.ReferenceOTU3863	3.0	11	Fungi	Zygomycota	Saprotroph	Undefined Saprotroph	Probable	NULL	NULL	NULL	Tedersoo L, et al. 2014. Science 346:1256688
New.CleanUp.ReferenceOTU8723	0.0	12	Fungi	Ascomycota	Saprotroph	Undefined Saprotroph	Probable	Microfungus	NULL	Saprobes found dung, soil and rotting vegetation (Cannon & Kirk 2007)	Cannon PF, Kirk PM. 2007. Fungal Families of the World. CAB International, Cambridge
New.CleanUp.ReferenceOTU6057	34.0	135	Fungi	Ascomycota	Saprotroph	Undefined Saprotroph	Possible	Microfungus	NULL	NULL	Sterkenburg E, et al. 2015. New Phytologist 207:1145-1158
New.ReferenceOTU109	67.0	140	Fungi	Ascomycota	Saprotroph	Undefined Saprotroph	Possible	Microfungus	NULL	NULL	Sterkenburg E, et al. 2015. New Phytologist 207:1145-1158
New.CleanUp.ReferenceOTU16194	0.0	18	Fungi	Ascomycota	Saprotroph	Undefined Saprotroph	Probable	NULL	NULL	NULL	Tedersoo L, et al. 2014. Science 346:1256688
New.CleanUp.ReferenceOTU5128	0.0	18	Fungi	Ascomycota	Saprotroph	Undefined Saprotroph	Possible	Microfungus	NULL	NULL	Sterkenburg E, et al. 2015. New Phytologist 207:1145-1158
New.CleanUp.ReferenceOTU7791	1.0	19	Fungi	Ascomycota	Saprotroph	Undefined Saprotroph	Possible	Yeast	NULL	NULL	Sterkenburg E, et al. 2015. New Phytologist 207:1145-1158
New.CleanUp.ReferenceOTU6396	0.0	19	Fungi	Ascomycota	Saprotroph	Undefined Saprotroph	Possible	Yeast	NULL	NULL	Sterkenburg E, et al. 2015. New Phytologist 207:1145-1158
New.CleanUp.ReferenceOTU11503	2.0	2	Fungi	Ascomycota	Saprotroph	Wood Saprotroph	Highly Probable	NULL	Soft Rot	NULL	Seehann G, et al. 1975. List of Fungi in Soft-Rot Tissue Tests. Institute fur Holzbiologie und Holzschutz, Bundesforschungsanstalt fur Forst - und Holzwirtshaft, Hamburg - Lohbrugge, Germany
SH217194.07FU_HM439513_reps	11.0	2	Fungi	Ascomycota	Saprotroph	Undefined Saprotroph	Possible	Microfungus	NULL	NULL	Sterkenburg E, et al. 2015. New Phytologist 207:1145-1158
New.CleanUp.ReferenceOTU6193	1.0	20	Fungi	Ascomycota	Saprotroph	Undefined Saprotroph	Possible	Microfungus	NULL	NULL	Sterkenburg E, et al. 2015. New Phytologist 207:1145-1158
SH208361.07FU_HE608888_reps	55.0	20	Fungi	Ascomycota	Saprotroph	Undefined Saprotroph	Possible	Microfungus	NULL	NULL	Sterkenburg E, et al. 2015. New Phytologist 207:1145-1158
New.ReferenceOTU0	1.0	2073	Fungi	Ascomycota	Saprotroph	Undefined Saprotroph	Possible	Microfungus	NULL	NULL	Sterkenburg E, et al. 2015. New Phytologist 207:1145-1158
New.ReferenceOTU20	99.0	23	Fungi	Ascomycota	Saprotroph	Dung SaprotrophunassignedWood Saprotroph	Probable	NULL	Soft Rot	NULL	Duncan CG, Eslyn WE. 1966. Mycologia 58:642-645	Bell A.��1983. Dung Fungi: An Illustrated Guide to Coprophilous Fungi in New Zealand. Victoria University Press, Wellington	Tedersoo L, et al. 2014. Science 346:1256691
SH191316.07FU_AF388928_refs	0.0	23	Fungi	Ascomycota	Saprotroph	Undefined Saprotroph	Probable	NULL	NULL	NULL	Tedersoo L, et al. 2014. Science 346:1256688
New.CleanUp.ReferenceOTU16459	0.0	234	Fungi	Ascomycota	Saprotroph	Undefined Saprotroph	Possible	Microfungus	NULL	NULL	Sterkenburg E, et al. 2015. New Phytologist 207:1145-1158
New.CleanUp.ReferenceOTU4269	42.0	24	Fungi	Ascomycota	Saprotroph	Undefined Saprotroph	Possible	Microfungus	NULL	NULL	Sterkenburg E, et al. 2015. New Phytologist 207:1145-1158
New.CleanUp.ReferenceOTU9571	1.0	27	Fungi	Ascomycota	Saprotroph	Undefined Saprotroph	Possible	Microfungus	NULL	NULL	Sterkenburg E, et al. 2015. New Phytologist 207:1145-1158
New.ReferenceOTU133	5.0	277	Fungi	Ascomycota	Saprotroph	Undefined Saprotroph	Possible	Microfungus	NULL	NULL	Sterkenburg E, et al. 2015. New Phytologist 207:1145-1158
SH177715.07FU_HE608903_reps	4.0	3	Fungi	Ascomycota	Saprotroph	Undefined Saprotroph	Possible	Microfungus	NULL	NULL	Sterkenburg E, et al. 2015. New Phytologist 207:1145-1158
New.CleanUp.ReferenceOTU10658	1.0	3	Fungi	Ascomycota	Saprotroph	Undefined Saprotroph	Possible	Microfungus	NULL	NULL	Sterkenburg E, et al. 2015. New Phytologist 207:1145-1158
New.CleanUp.ReferenceOTU3158	0.0	30	Fungi	Ascomycota	Saprotroph	Soil Saprotroph	Probable	Microfungus	NULL	From rhizosphere soil and coniferous ectomycorrhizal root tips (Rosling et al. 2011)	Rosling A, et al. 2011. Science 333:876-879
New.CleanUp.ReferenceOTU13364	1.0	302	Fungi	Ascomycota	Saprotroph	Undefined Saprotroph	Probable	Microfungus	NULL	NULL	Tedersoo L, et al. 2014. Science 346:1256688
New.CleanUp.ReferenceOTU3216	9.0	31	Fungi	Ascomycota	Saprotroph	Undefined Saprotroph	Possible	Microfungus	NULL	NULL	Sterkenburg E, et al. 2015. New Phytologist 207:1145-1158
New.CleanUp.ReferenceOTU15107	0.0	32	Fungi	Ascomycota	Saprotroph	Undefined Saprotroph	Possible	Microfungus	NULL	NULL	Sterkenburg E, et al. 2015. New Phytologist 207:1145-1158
New.ReferenceOTU119	0.0	34	Fungi	Ascomycota	Saprotroph	Undefined Saprotroph	Possible	Microfungus	NULL	NULL	Sterkenburg E, et al. 2015. New Phytologist 207:1145-1158
New.ReferenceOTU170	699.0	346	Fungi	Ascomycota	Saprotroph	Wood Saprotroph	Highly Probable	NULL	Soft Rot	NULL	Seehann G, et al. 1975. List of Fungi in Soft-Rot Tissue Tests. Institute fur Holzbiologie und Holzschutz, Bundesforschungsanstalt fur Forst - und Holzwirtshaft, Hamburg - Lohbrugge, Germany
SH195295.07FU_AB625592_refs	561.0	35	Fungi	Ascomycota	Saprotroph	Undefined SaprotrophunassignedWood Saprotroph	Probable	NULL	Soft Rot	NULL	Seehann G, et al. 1975. List of Fungi in Soft-Rot Tissue Tests. Institute fur Holzbiologie und Holzschutz, Bundesforschungsanstalt fur Forst - und Holzwirtshaft, Hamburg - Lohbrugge, Germany	Costa IPMW, et al. 2012. Mycotaxon 119:26	Tedersoo L, et al. 2014. Science 346:1256688
New.CleanUp.ReferenceOTU3614	34.0	4	Fungi	Ascomycota	Saprotroph	Undefined Saprotroph	Possible	Microfungus	NULL	NULL	Sterkenburg E, et al. 2015. New Phytologist 207:1145-1158
New.CleanUp.ReferenceOTU5740	5.0	40	Fungi	Ascomycota	Saprotroph	Undefined Saprotroph	Probable	NULL	NULL	NULL	Tedersoo L, et al. 2014. Science 346:1256688
New.CleanUp.ReferenceOTU1691	0.0	41	Fungi	Ascomycota	Saprotroph	Undefined Saprotroph	Probable	NULL	NULL	NULL	Tedersoo L, et al. 2014. Science 346:1256688
New.CleanUp.ReferenceOTU15283	0.0	41	Fungi	Ascomycota	Saprotroph	Undefined Saprotroph	Possible	Microfungus	NULL	NULL	Sterkenburg E, et al. 2015. New Phytologist 207:1145-1158
New.ReferenceOTU103	2.0	42	Fungi	Ascomycota	Saprotroph	Undefined Saprotroph	Possible	Microfungus	NULL	NULL	Sterkenburg E, et al. 2015. New Phytologist 207:1145-1158
New.CleanUp.ReferenceOTU3796	2.0	47	Fungi	Ascomycota	Saprotroph	Undefined Saprotroph	Possible	Microfungus	NULL	NULL	Sterkenburg E, et al. 2015. New Phytologist 207:1145-1158
New.ReferenceOTU107	15.0	5	Fungi	Ascomycota	Saprotroph	Undefined Saprotroph	Possible	Microfungus	NULL	NULL	Sterkenburg E, et al. 2015. New Phytologist 207:1145-1158
New.CleanUp.ReferenceOTU10830	1.0	5	Fungi	Ascomycota	Saprotroph	Undefined Saprotroph	Possible	Microfungus	NULL	NULL	Sterkenburg E, et al. 2015. New Phytologist 207:1145-1158
New.CleanUp.ReferenceOTU5952	0.0	50	Fungi	Ascomycota	Saprotroph	Undefined Saprotroph	Possible	Microfungus	NULL	NULL	Sterkenburg E, et al. 2015. New Phytologist 207:1145-1158
New.CleanUp.ReferenceOTU8441	0.0	51	Fungi	Ascomycota	Saprotroph	Undefined Saprotroph	Possible	Microfungus	NULL	NULL	Sterkenburg E, et al. 2015. New Phytologist 207:1145-1158
New.ReferenceOTU222	2.0	527	Fungi	Basidiomycota	Saprotroph	Soil Saprotroph	Possible	Microfungus	NULL	From forest soil (Calduch et al. 2002)	Calduch M, et al. 2002. Mycologia 94:355-361
New.ReferenceOTU71	0.0	59	Fungi	Basidiomycota	Saprotroph	Undefined Saprotroph	Probable	Clavarioid	NULL	NULL	Tedersoo L, et al. 2014. Science 346:1256688
New.ReferenceOTU203	598.0	61	Fungi	Ascomycota	Saprotroph	Undefined Saprotroph	Possible	Microfungus	NULL	NULL	Sterkenburg E, et al. 2015. New Phytologist 207:1145-1158
New.CleanUp.ReferenceOTU16165	0.0	65	Fungi	Ascomycota	Saprotroph	Undefined Saprotroph	Probable	NULL	NULL	NULL	Tedersoo L, et al. 2014. Science 346:1256688
New.ReferenceOTU228	3.0	651	Fungi	Basidiomycota	Saprotroph	Soil Saprotroph	Possible	Microfungus	NULL	From forest soil (Calduch et al. 2002)	Calduch M, et al. 2002. Mycologia 94:355-361
New.CleanUp.ReferenceOTU8041	0.0	67	Fungi	Ascomycota	Saprotroph	Undefined Saprotroph	Possible	Microfungus	NULL	NULL	Sterkenburg E, et al. 2015. New Phytologist 207:1145-1158
New.CleanUp.ReferenceOTU7256	1.0	69	Fungi	Ascomycota	Saprotroph	Undefined Saprotroph	Probable	NULL	NULL	NULL	Tedersoo L, et al. 2014. Science 346:1256688
New.CleanUp.ReferenceOTU2159	1.0	7	Fungi	Ascomycota	Saprotroph	Undefined Saprotroph	Possible	Microfungus	NULL	NULL	Sterkenburg E, et al. 2015. New Phytologist 207:1145-1158
New.CleanUp.ReferenceOTU13548	0.0	75	Fungi	Ascomycota	Saprotroph	Undefined Saprotroph	Probable	Microfungus	NULL	NULL	Tedersoo L, et al. 2014. Science 346:1256688
New.CleanUp.ReferenceOTU2444	1.0	88	Fungi	Ascomycota	Saprotroph	Undefined Saprotroph	Possible	Microfungus	NULL	NULL	Tsuneda A, et al. 2011. Mycologia 103:1146-1155 (https://doi.org/10.3852/11-054)
New.CleanUp.ReferenceOTU11633	4.0	9	Fungi	Ascomycota	Saprotroph	Wood Saprotroph	Highly Probable	NULL	Soft Rot	NULL	Seehann G, et al. 1975. List of Fungi in Soft-Rot Tissue Tests. Institute fur Holzbiologie und Holzschutz, Bundesforschungsanstalt fur Forst - und Holzwirtshaft, Hamburg - Lohbrugge, Germany
New.CleanUp.ReferenceOTU2299	0.0	91	Fungi	Ascomycota	Saprotroph	Undefined Saprotroph	Probable	NULL	NULL	NULL	Tedersoo L, et al. 2014. Science 346:1256688
New.ReferenceOTU76	0.0	10	Fungi	Zygomycota	SaprotrophunassignedSymbiotroph	EndophyteunassignedLitter SaprotrophunassignedSoil SaprotrophunassignedUndefined Saprotroph	Possible	Microfungus	NULL	Saprobic in soil and thus frequenctly isolated from soil and material contaminated with soil such as hay or rotten silage and spoil tips (Cannon & Kirk 2007)	Cannon PF, Kirk PM. 2007. Fungal Families of the World. CAB International, Cambridge	Purahong W, et al. 2016. Molecular Ecology 25:4059-4074
New.ReferenceOTU115	54.0	113	Fungi	Zygomycota	SaprotrophunassignedSymbiotroph	EndophyteunassignedLitter SaprotrophunassignedSoil SaprotrophunassignedUndefined Saprotroph	Possible	Microfungus	NULL	Saprobic in soil and thus frequenctly isolated from soil and material contaminated with soil such as hay or rotten silage and spoil tips (Cannon & Kirk 2007)	Cannon PF, Kirk PM. 2007. Fungal Families of the World. CAB International, Cambridge	Purahong W, et al. 2016. Molecular Ecology 25:4059-4074
New.CleanUp.ReferenceOTU6330	0.0	122	Fungi	Zygomycota	SaprotrophunassignedSymbiotroph	EndophyteunassignedLitter SaprotrophunassignedSoil SaprotrophunassignedUndefined Saprotroph	Possible	Microfungus	NULL	Saprobic in soil and thus frequenctly isolated from soil and material contaminated with soil such as hay or rotten silage and spoil tips (Cannon & Kirk 2007)	Cannon PF, Kirk PM. 2007. Fungal Families of the World. CAB International, Cambridge	Purahong W, et al. 2016. Molecular Ecology 25:4059-4074
New.ReferenceOTU26	158.0	127	Fungi	Zygomycota	SaprotrophunassignedSymbiotroph	EndophyteunassignedLitter SaprotrophunassignedSoil SaprotrophunassignedUndefined Saprotroph	Possible	Microfungus	NULL	Saprobic in soil and thus frequenctly isolated from soil and material contaminated with soil such as hay or rotten silage and spoil tips (Cannon & Kirk 2007)	Cannon PF, Kirk PM. 2007. Fungal Families of the World. CAB International, Cambridge	Purahong W, et al. 2016. Molecular Ecology 25:4059-4074
New.CleanUp.ReferenceOTU13501	0.0	13	Fungi	Ascomycota	SaprotrophunassignedSymbiotroph	Dung SaprotrophunassignedEndophyteunassignedLitter SaprotrophunassignedUndefined Saprotroph	Possible	Microfungus	NULL	Endophyte detection method-culture (David et al. 2016)	Bell A. 1983. Dung Fungi: An Illustrated Guide to Coprophilous Fungi in New Zealand. Victoria University Press, Wellington	Tedersoo L, et al. 2014. Science 346:1256688	David AS, et al. 2016. Microbial Ecology 71:912-926	Purahong W, et al. 2016. Molecular Ecology 25:4059-4074 (as litter saprotroph)
New.CleanUp.ReferenceOTU17069	1.0	143	Fungi	Basidiomycota	SaprotrophunassignedSymbiotroph	Undefined SaprotrophunassignedUndefined Biotroph	Probable	Agaricoid	NULL	Previously classified as Hygrophorus	carbon signature suggests biotrophy with bryophytes, grasses, or understory plants	Tedersoo L, et al. 2014. Science 346:1256688	Lodge et al. 2014. Fungal Diversity 64:1-99	Lodge 2014. Omphalina 5:2-6	Seitzman et al. 2011. Mycologia 103:280-290.
New.CleanUp.ReferenceOTU14844	0.0	144	Fungi	Zygomycota	SaprotrophunassignedSymbiotroph	EndophyteunassignedLitter SaprotrophunassignedSoil SaprotrophunassignedUndefined Saprotroph	Possible	Microfungus	NULL	Saprobic in soil and thus frequenctly isolated from soil and material contaminated with soil such as hay or rotten silage and spoil tips (Cannon & Kirk 2007)	Cannon PF, Kirk PM. 2007. Fungal Families of the World. CAB International, Cambridge	Purahong W, et al. 2016. Molecular Ecology 25:4059-4074
New.ReferenceOTU165	9.0	172	Fungi	Zygomycota	SaprotrophunassignedSymbiotroph	EndophyteunassignedLitter SaprotrophunassignedSoil SaprotrophunassignedUndefined Saprotroph	Possible	Microfungus	NULL	Saprobic in soil and thus frequenctly isolated from soil and material contaminated with soil such as hay or rotten silage and spoil tips (Cannon & Kirk 2007)	Cannon PF, Kirk PM. 2007. Fungal Families of the World. CAB International, Cambridge	Purahong W, et al. 2016. Molecular Ecology 25:4059-4074
New.ReferenceOTU98	0.0	178	Fungi	Zygomycota	SaprotrophunassignedSymbiotroph	EndophyteunassignedLitter SaprotrophunassignedSoil SaprotrophunassignedUndefined Saprotroph	Possible	Microfungus	NULL	Saprobic in soil and thus frequenctly isolated from soil and material contaminated with soil such as hay or rotten silage and spoil tips (Cannon & Kirk 2007)	Cannon PF, Kirk PM. 2007. Fungal Families of the World. CAB International, Cambridge	Purahong W, et al. 2016. Molecular Ecology 25:4059-4074
SH185972.07FU_JN943800_refs	5.0	180	Fungi	Zygomycota	SaprotrophunassignedSymbiotroph	EndophyteunassignedLitter SaprotrophunassignedSoil SaprotrophunassignedUndefined Saprotroph	Possible	Microfungus	NULL	Saprobic in soil and thus frequenctly isolated from soil and material contaminated with soil such as hay or rotten silage and spoil tips (Cannon & Kirk 2007)	Cannon PF, Kirk PM. 2007. Fungal Families of the World. CAB International, Cambridge	Purahong W, et al. 2016. Molecular Ecology 25:4059-4074
New.CleanUp.ReferenceOTU9072	0.0	2	Fungi	Zygomycota	SaprotrophunassignedSymbiotroph	EndophyteunassignedLitter SaprotrophunassignedSoil SaprotrophunassignedUndefined Saprotroph	Possible	Microfungus	NULL	Saprobic in soil and thus frequenctly isolated from soil and material contaminated with soil such as hay or rotten silage and spoil tips (Cannon & Kirk 2007)	Cannon PF, Kirk PM. 2007. Fungal Families of the World. CAB International, Cambridge	Purahong W, et al. 2016. Molecular Ecology 25:4059-4074
New.ReferenceOTU209	255.0	212	Fungi	Zygomycota	SaprotrophunassignedSymbiotroph	EndophyteunassignedLitter SaprotrophunassignedSoil SaprotrophunassignedUndefined Saprotroph	Possible	Microfungus	NULL	Saprobic in soil and thus frequenctly isolated from soil and material contaminated with soil such as hay or rotten silage and spoil tips (Cannon & Kirk 2007)	Cannon PF, Kirk PM. 2007. Fungal Families of the World. CAB International, Cambridge	Purahong W, et al. 2016. Molecular Ecology 25:4059-4074
New.CleanUp.ReferenceOTU17040	0.0	218	Fungi	Basidiomycota	SaprotrophunassignedSymbiotroph	Undefined SaprotrophunassignedUndefined Biotroph	Probable	Agaricoid	NULL	Previously classified as Hygrophorus	carbon signature suggests biotrophy with bryophytes, grasses, or understory plants	Tedersoo L, et al. 2014. Science 346:1256688	Lodge et al. 2014. Fungal Diversity 64:1-99	Lodge 2014. Omphalina 5:2-6	Seitzman et al. 2011. Mycologia 103:280-290.
New.CleanUp.ReferenceOTU12695	0.0	218	Fungi	Ascomycota	SaprotrophunassignedSymbiotroph	Dung SaprotrophunassignedEctomycorrhizalunassignedSoil SaprotrophunassignedWood Saprotroph	Possible	Gasteroid-Pezizoid	NULL	Saprobic on soil, dung or rotten wood or mycorrhizal, some species hypogeous, others associated with fire sites (Cannon & Kirk 2007)	Cannon PF, Kirk PM. 2007. Fungal Families of the World. CAB International, Cambridge
New.CleanUp.ReferenceOTU5493	0.0	22	Fungi	Zygomycota	SaprotrophunassignedSymbiotroph	EndophyteunassignedLitter SaprotrophunassignedSoil SaprotrophunassignedUndefined Saprotroph	Possible	Microfungus	NULL	Saprobic in soil and thus frequenctly isolated from soil and material contaminated with soil such as hay or rotten silage and spoil tips (Cannon & Kirk 2007)	Cannon PF, Kirk PM. 2007. Fungal Families of the World. CAB International, Cambridge	Purahong W, et al. 2016. Molecular Ecology 25:4059-4074
New.CleanUp.ReferenceOTU14185	0.0	22	Fungi	Zygomycota	SaprotrophunassignedSymbiotroph	EndophyteunassignedLitter SaprotrophunassignedSoil SaprotrophunassignedUndefined Saprotroph	Possible	Microfungus	NULL	Saprobic in soil and thus frequenctly isolated from soil and material contaminated with soil such as hay or rotten silage and spoil tips (Cannon & Kirk 2007)	Cannon PF, Kirk PM. 2007. Fungal Families of the World. CAB International, Cambridge	Purahong W, et al. 2016. Molecular Ecology 25:4059-4074
New.ReferenceOTU145	1.0	3	Fungi	Zygomycota	SaprotrophunassignedSymbiotroph	EndophyteunassignedLitter SaprotrophunassignedSoil SaprotrophunassignedUndefined Saprotroph	Possible	Microfungus	NULL	Saprobic in soil and thus frequenctly isolated from soil and material contaminated with soil such as hay or rotten silage and spoil tips (Cannon & Kirk 2007)	Cannon PF, Kirk PM. 2007. Fungal Families of the World. CAB International, Cambridge	Purahong W, et al. 2016. Molecular Ecology 25:4059-4074
New.CleanUp.ReferenceOTU2347	0.0	31	Fungi	Zygomycota	SaprotrophunassignedSymbiotroph	EndophyteunassignedLitter SaprotrophunassignedSoil SaprotrophunassignedUndefined Saprotroph	Possible	Microfungus	NULL	Saprobic in soil and thus frequenctly isolated from soil and material contaminated with soil such as hay or rotten silage and spoil tips (Cannon & Kirk 2007)	Cannon PF, Kirk PM. 2007. Fungal Families of the World. CAB International, Cambridge	Purahong W, et al. 2016. Molecular Ecology 25:4059-4074
New.CleanUp.ReferenceOTU15983	2.0	41	Fungi	Zygomycota	SaprotrophunassignedSymbiotroph	EndophyteunassignedLitter SaprotrophunassignedSoil SaprotrophunassignedUndefined Saprotroph	Possible	Microfungus	NULL	Saprobic in soil and thus frequenctly isolated from soil and material contaminated with soil such as hay or rotten silage and spoil tips (Cannon & Kirk 2007)	Cannon PF, Kirk PM. 2007. Fungal Families of the World. CAB International, Cambridge	Purahong W, et al. 2016. Molecular Ecology 25:4059-4074
New.CleanUp.ReferenceOTU12659	0.0	43	Fungi	Ascomycota	SaprotrophunassignedSymbiotroph	Dung SaprotrophunassignedEctomycorrhizalunassignedSoil SaprotrophunassignedWood Saprotroph	Possible	Gasteroid-Pezizoid	NULL	Saprobic on soil, dung or rotten wood or mycorrhizal, some species hypogeous, others associated with fire sites (Cannon & Kirk 2007)	Cannon PF, Kirk PM. 2007. Fungal Families of the World. CAB International, Cambridge
New.CleanUp.ReferenceOTU4818	0.0	44	Fungi	Ascomycota	SaprotrophunassignedSymbiotroph	Dung SaprotrophunassignedEndophyteunassignedLitter SaprotrophunassignedUndefined Saprotroph	Possible	Microfungus	NULL	Endophyte detection method-culture (David et al. 2016)	Bell A. 1983. Dung Fungi: An Illustrated Guide to Coprophilous Fungi in New Zealand. Victoria University Press, Wellington	Tedersoo L, et al. 2014. Science 346:1256688	David AS, et al. 2016. Microbial Ecology 71:912-926	Purahong W, et al. 2016. Molecular Ecology 25:4059-4074 (as litter saprotroph)
New.CleanUp.ReferenceOTU10108	0.0	5	Fungi	Zygomycota	SaprotrophunassignedSymbiotroph	EndophyteunassignedLitter SaprotrophunassignedSoil SaprotrophunassignedUndefined Saprotroph	Possible	Microfungus	NULL	Saprobic in soil and thus frequenctly isolated from soil and material contaminated with soil such as hay or rotten silage and spoil tips (Cannon & Kirk 2007)	Cannon PF, Kirk PM. 2007. Fungal Families of the World. CAB International, Cambridge	Purahong W, et al. 2016. Molecular Ecology 25:4059-4074
New.CleanUp.ReferenceOTU6616	0.0	539	Fungi	Zygomycota	SaprotrophunassignedSymbiotroph	EndophyteunassignedLitter SaprotrophunassignedSoil SaprotrophunassignedUndefined Saprotroph	Possible	Microfungus	NULL	Saprobic in soil and thus frequenctly isolated from soil and material contaminated with soil such as hay or rotten silage and spoil tips (Cannon & Kirk 2007)	Cannon PF, Kirk PM. 2007. Fungal Families of the World. CAB International, Cambridge	Purahong W, et al. 2016. Molecular Ecology 25:4059-4074
New.ReferenceOTU5	1.0	57	Fungi	Zygomycota	SaprotrophunassignedSymbiotroph	EndophyteunassignedLitter SaprotrophunassignedSoil SaprotrophunassignedUndefined Saprotroph	Possible	Microfungus	NULL	Saprobic in soil and thus frequenctly isolated from soil and material contaminated with soil such as hay or rotten silage and spoil tips (Cannon & Kirk 2007)	Cannon PF, Kirk PM. 2007. Fungal Families of the World. CAB International, Cambridge	Purahong W, et al. 2016. Molecular Ecology 25:4059-4074
New.CleanUp.ReferenceOTU4900	0.0	57	Fungi	Zygomycota	SaprotrophunassignedSymbiotroph	EndophyteunassignedLitter SaprotrophunassignedSoil SaprotrophunassignedUndefined Saprotroph	Possible	Microfungus	NULL	Saprobic in soil and thus frequenctly isolated from soil and material contaminated with soil such as hay or rotten silage and spoil tips (Cannon & Kirk 2007)	Cannon PF, Kirk PM. 2007. Fungal Families of the World. CAB International, Cambridge	Purahong W, et al. 2016. Molecular Ecology 25:4059-4074
New.ReferenceOTU60	0.0	58	Fungi	Zygomycota	SaprotrophunassignedSymbiotroph	EndophyteunassignedLitter SaprotrophunassignedSoil SaprotrophunassignedUndefined Saprotroph	Possible	Microfungus	NULL	Saprobic in soil and thus frequenctly isolated from soil and material contaminated with soil such as hay or rotten silage and spoil tips (Cannon & Kirk 2007)	Cannon PF, Kirk PM. 2007. Fungal Families of the World. CAB International, Cambridge	Purahong W, et al. 2016. Molecular Ecology 25:4059-4074
New.CleanUp.ReferenceOTU5905	0.0	70	Fungi	Zygomycota	SaprotrophunassignedSymbiotroph	EndophyteunassignedLitter SaprotrophunassignedSoil SaprotrophunassignedUndefined Saprotroph	Possible	Microfungus	NULL	Saprobic in soil and thus frequenctly isolated from soil and material contaminated with soil such as hay or rotten silage and spoil tips (Cannon & Kirk 2007)	Cannon PF, Kirk PM. 2007. Fungal Families of the World. CAB International, Cambridge	Purahong W, et al. 2016. Molecular Ecology 25:4059-4074
New.CleanUp.ReferenceOTU12723	0.0	73	Fungi	Basidiomycota	SaprotrophunassignedSymbiotroph	EctomycorrhizalunassignedUndefined Saprotroph	Probable	Clavarioid	NULL	On the ground, on soil, a few on wood. At least some speices ectomycorrhizal (Cannon & Kirk 2007)	Cannon PF, Kirk PM. 2007. Fungal Families of the World. CAB International, Cambridge
New.CleanUp.ReferenceOTU343	0.0	1	Fungi	Glomeromycota	Symbiotroph	Arbuscular Mycorrhizal	Highly Probable	NULL	NULL	NULL	Redecker D, et al. 2013. Mycorrhiza 23:515-531
New.CleanUp.ReferenceOTU15878	0.0	1	Fungi	Glomeromycota	Symbiotroph	Arbuscular Mycorrhizal	Highly Probable	NULL	NULL	NULL	Redecker D, et al. 2013. Mycorrhiza 23:515-531
New.ReferenceOTU142	0.0	1	Fungi	Ascomycota	Symbiotroph	Lichenized	Probable	Thallus	NULL	NULL	Tedersoo L, et al. 2014. Science 346:1256688
New.CleanUp.ReferenceOTU13955	0.0	10	Fungi	Glomeromycota	Symbiotroph	Arbuscular Mycorrhizal	Highly Probable	NULL	NULL	NULL	Redecker D, et al. 2013. Mycorrhiza 23:515-531
New.CleanUp.ReferenceOTU7813	0.0	10	Fungi	Glomeromycota	Symbiotroph	Arbuscular Mycorrhizal	Highly Probable	NULL	NULL	NULL	Redecker D, et al. 2013. Mycorrhiza 23:515-531
New.ReferenceOTU67	3.0	117	Fungi	Ascomycota	Symbiotroph	Lichenized	Highly Probable	Thallus	NULL	NULL	Esslinger TL. 2014. North Dakota State University (http://www.ndsu.edu/pubweb/~esslinge/chcklst/chcklst7.htm)
New.CleanUp.ReferenceOTU2951	0.0	12	Fungi	Glomeromycota	Symbiotroph	Arbuscular Mycorrhizal	Highly Probable	NULL	NULL	NULL	Redecker D, et al. 2013. Mycorrhiza 23:515-531
New.CleanUp.ReferenceOTU6463	0.0	12	Fungi	Ascomycota	Symbiotroph	Endophyte	Highly Probable	Microfungus	NULL	Host - Malvaceae	Costa IPMW, et al. 2012. Mycotaxon 119:26
SH177890.07FU_AB839399_reps	0.0	13	Fungi	Basidiomycota	Symbiotroph	Ectomycorrhizal	Highly Probable	Corticioid	NULL	NULL	Rinaldi AC, et al. 2008. Fungal Diversity 33:1-45	Tedersoo L, et al. 2010. Mycorrhiza 20:217-263	http://mycorrhizas.info/ecmf.html
New.CleanUp.ReferenceOTU971	0.0	13	Fungi	Glomeromycota	Symbiotroph	Arbuscular Mycorrhizal	Highly Probable	NULL	NULL	NULL	Redecker D, et al. 2013. Mycorrhiza 23:515-531
New.CleanUp.ReferenceOTU10645	0.0	14	Fungi	Glomeromycota	Symbiotroph	Arbuscular Mycorrhizal	Highly Probable	NULL	NULL	NULL	Redecker D, et al. 2013. Mycorrhiza 23:515-531
New.ReferenceOTU206	1.0	145	Fungi	Glomeromycota	Symbiotroph	Arbuscular Mycorrhizal	Highly Probable	NULL	NULL	NULL	Redecker D, et al. 2013. Mycorrhiza 23:515-531
New.CleanUp.ReferenceOTU9183	0.0	147	Fungi	Glomeromycota	Symbiotroph	Arbuscular Mycorrhizal	Highly Probable	NULL	NULL	NULL	Redecker D, et al. 2013. Mycorrhiza 23:515-531
New.CleanUp.ReferenceOTU13248	0.0	15	Fungi	Glomeromycota	Symbiotroph	Arbuscular Mycorrhizal	Highly Probable	NULL	NULL	NULL	Redecker D, et al. 2013. Mycorrhiza 23:515-531
New.ReferenceOTU169	2.0	150	Fungi	Glomeromycota	Symbiotroph	Arbuscular Mycorrhizal	Highly Probable	NULL	NULL	NULL	Redecker D, et al. 2013. Mycorrhiza 23:515-531
New.ReferenceOTU70	2.0	174	Fungi	Glomeromycota	Symbiotroph	Arbuscular Mycorrhizal	Highly Probable	NULL	NULL	NULL	Redecker D, et al. 2013. Mycorrhiza 23:515-531
New.CleanUp.ReferenceOTU16159	1.0	18	Fungi	Glomeromycota	Symbiotroph	Arbuscular Mycorrhizal	Highly Probable	NULL	NULL	NULL	Redecker D, et al. 2013. Mycorrhiza 23:515-531
New.CleanUp.ReferenceOTU6307	1.0	19	Fungi	Ascomycota	Symbiotroph	Lichenized	Highly Probable	Thallus	NULL	NULL	Esslinger TL. 2014. North Dakota State University (http://www.ndsu.edu/pubweb/~esslinge/chcklst/chcklst7.htm)
New.CleanUp.ReferenceOTU11528	0.0	20	Fungi	Basidiomycota	Symbiotroph	Ectomycorrhizal	Highly Probable	Corticioid	NULL	NULL	Rinaldi AC, et al. 2008. Fungal Diversity 33:1-45	Tedersoo L, et al. 2010. Mycorrhiza 20:217-263	http://mycorrhizas.info/ecmf.html
New.CleanUp.ReferenceOTU4034	1.0	20	Fungi	Glomeromycota	Symbiotroph	Arbuscular Mycorrhizal	Highly Probable	NULL	NULL	NULL	Redecker D, et al. 2013. Mycorrhiza 23:515-531
New.CleanUp.ReferenceOTU11156	0.0	20	Fungi	Glomeromycota	Symbiotroph	Arbuscular Mycorrhizal	Highly Probable	NULL	NULL	NULL	Redecker D, et al. 2013. Mycorrhiza 23:515-531
New.ReferenceOTU68	9.0	20	Fungi	Ascomycota	Symbiotroph	Lichenized	Highly Probable	Thallus	NULL	NULL	Esslinger TL. 2014. North Dakota State University (http://www.ndsu.edu/pubweb/~esslinge/chcklst/chcklst7.htm)
New.CleanUp.ReferenceOTU17615	0.0	22	Fungi	Glomeromycota	Symbiotroph	Arbuscular Mycorrhizal	Highly Probable	NULL	NULL	NULL	Redecker D, et al. 2013. Mycorrhiza 23:515-531
New.CleanUp.ReferenceOTU15117	1.0	24	Fungi	Glomeromycota	Symbiotroph	Arbuscular Mycorrhizal	Highly Probable	NULL	NULL	NULL	Redecker D, et al. 2013. Mycorrhiza 23:515-531
New.CleanUp.ReferenceOTU640	0.0	28	Fungi	Glomeromycota	Symbiotroph	Arbuscular Mycorrhizal	Highly Probable	NULL	NULL	NULL	Redecker D, et al. 2013. Mycorrhiza 23:515-531
New.CleanUp.ReferenceOTU4072	0.0	29	Fungi	Basidiomycota	Symbiotroph	Ectomycorrhizal	Highly Probable	Boletoid	NULL	NULL	Rinaldi AC, et al. 2008. Fungal Diversity 33:1-45	Tedersoo L, et al. 2010. Mycorrhiza 20:217-263	http://mycorrhizas.info/ecmf.html
New.CleanUp.ReferenceOTU7442	5.0	327	Fungi	Glomeromycota	Symbiotroph	Arbuscular Mycorrhizal	Highly Probable	NULL	NULL	NULL	Redecker D, et al. 2013. Mycorrhiza 23:515-531
New.ReferenceOTU210	27.0	4	Fungi	Ascomycota	Symbiotroph	Endophyte	Highly Probable	NULL	NULL	Endophyte detection method-culture (David et al. 2016)	David AS, et al. 2016. Microbial Ecology 71:912-926
New.CleanUp.ReferenceOTU5515	0.0	4	Fungi	Glomeromycota	Symbiotroph	Arbuscular Mycorrhizal	Highly Probable	NULL	NULL	NULL	Redecker D, et al. 2013. Mycorrhiza 23:515-531
New.CleanUp.ReferenceOTU4313	0.0	4	Fungi	Ascomycota	Symbiotroph	Endophyte	Highly Probable	Microfungus	NULL	Dark Septate Endophyte, known from plant roots.	Tedersoo L, et al. 2010. Mycorrhiza 20:217-263	Newsham 2011. New Phytologist 190:783-793 (as DSE)
New.CleanUp.ReferenceOTU4529	0.0	41	Fungi	Basidiomycota	Symbiotroph	Ectomycorrhizal	Highly Probable	Agaricoid	NULL	NULL	Rinaldi AC, et al. 2008. Fungal Diversity 33:1-45	Tedersoo L, et al. 2010. Mycorrhiza 20:217-263	http://mycorrhizas.info/ecmf.html
New.CleanUp.ReferenceOTU13724	0.0	42	Fungi	Glomeromycota	Symbiotroph	Arbuscular Mycorrhizal	Highly Probable	NULL	NULL	NULL	Redecker D, et al. 2013. Mycorrhiza 23:515-531
New.ReferenceOTU99	49.0	434	Fungi	Ascomycota	Symbiotroph	Endophyte	Highly Probable	Microfungus	NULL	Endophyte detection method-culture (David et al. 2016)	David AS, et al. 2016. Microbial Ecology 71:912-926
New.CleanUp.ReferenceOTU13191	1.0	46	Fungi	Ascomycota	Symbiotroph	Endophyte	Highly Probable	Microfungus	NULL	Dark Septate Endophyte, known from plant roots.	Tedersoo L, et al. 2010. Mycorrhiza 20:217-263	Newsham 2011. New Phytologist 190:783-793 (as DSE)
New.CleanUp.ReferenceOTU17375	1.0	46	Fungi	Glomeromycota	Symbiotroph	Arbuscular Mycorrhizal	Highly Probable	NULL	NULL	NULL	Redecker D, et al. 2013. Mycorrhiza 23:515-531
New.CleanUp.ReferenceOTU15800	0.0	5	Fungi	Glomeromycota	Symbiotroph	Arbuscular Mycorrhizal	Highly Probable	NULL	NULL	NULL	Redecker D, et al. 2013. Mycorrhiza 23:515-531
New.CleanUp.ReferenceOTU805	0.0	50	Fungi	Ascomycota	Symbiotroph	Lichenized	Highly Probable	Thallus	NULL	NULL	James TY, et al. 2006. Nature 443:818-822
New.CleanUp.ReferenceOTU16719	0.0	53	Fungi	Ascomycota	Symbiotroph	Lichenized	Highly Probable	Thallus	NULL	NULL	Esslinger TL. 2014. North Dakota State University (http://www.ndsu.edu/pubweb/~esslinge/chcklst/chcklst7.htm)
New.CleanUp.ReferenceOTU17611	0.0	56	Fungi	Basidiomycota	Symbiotroph	Ectomycorrhizal	Highly Probable	Agaricoid	NULL	Common name - milk-cap	Rinaldi AC, et al. 2008. Fungal Diversity 33:1-45	Tedersoo L, et al. 2010. Mycorrhiza 20:217-263	http://mycorrhizas.info/ecmf.html
New.CleanUp.ReferenceOTU7011	0.0	56	Fungi	Glomeromycota	Symbiotroph	Arbuscular Mycorrhizal	Highly Probable	NULL	NULL	NULL	Redecker D, et al. 2013. Mycorrhiza 23:515-531
New.CleanUp.ReferenceOTU14915	2.0	57	Fungi	Ascomycota	Symbiotroph	Endophyte	Highly Probable	Microfungus	NULL	Endophyte isolated from the roots of Panicum virgatum (Panicoideae	Walsh et al. 2014)	Walsh E, et al. 2014. Mycologia 106:856-864
New.CleanUp.ReferenceOTU9619	0.0	59	Fungi	Glomeromycota	Symbiotroph	Arbuscular Mycorrhizal	Highly Probable	NULL	NULL	NULL	Redecker D, et al. 2013. Mycorrhiza 23:515-531
New.CleanUp.ReferenceOTU8628	0.0	6	Fungi	Glomeromycota	Symbiotroph	Arbuscular Mycorrhizal	Highly Probable	NULL	NULL	NULL	Redecker D, et al. 2013. Mycorrhiza 23:515-531
New.CleanUp.ReferenceOTU5265	2.0	65	Fungi	Glomeromycota	Symbiotroph	Arbuscular Mycorrhizal	Highly Probable	NULL	NULL	NULL	Redecker D, et al. 2013. Mycorrhiza 23:515-531
New.ReferenceOTU195	7.0	677	Fungi	Ascomycota	Symbiotroph	Endophyte	Probable	Microfungus	NULL	Endophyte detection method-culture (Hanada et al. 2008)	Hanada RE, et al. 2008. Mycological Research 112:1335-1343
New.CleanUp.ReferenceOTU15232	0.0	76	Fungi	Glomeromycota	Symbiotroph	Arbuscular Mycorrhizal	Highly Probable	NULL	NULL	NULL	Redecker D, et al. 2013. Mycorrhiza 23:515-531
New.CleanUp.ReferenceOTU6157	0.0	9	Fungi	Glomeromycota	Symbiotroph	Arbuscular Mycorrhizal	Highly Probable	NULL	NULL	NULL	Cannon PF, Kirk PM. 2007. Fungal Families of the World. CAB International, Cambridge	Redecker D, et al. 2013. Mycorrhiza 23:515-531
New.CleanUp.ReferenceOTU4527	0.0	9	Fungi	Glomeromycota	Symbiotroph	Arbuscular Mycorrhizal	Highly Probable	NULL	NULL	NULL	Redecker D, et al. 2013. Mycorrhiza 23:515-531
New.ReferenceOTU6	0.0	91	Fungi	Glomeromycota	Symbiotroph	Arbuscular Mycorrhizal	Highly Probable	NULL	NULL	NULL	Redecker D, et al. 2013. Mycorrhiza 23:515-531
SH217942.07FU_JQ246357_reps	5.0	1	Fungi	Ascomycota	unassigned	unassigned	-	-	-	Unassigned	-
New.CleanUp.ReferenceOTU5552	0.0	1	Fungi	Ascomycota	unassigned	unassigned	-	-	-	Unassigned	-
New.ReferenceOTU15	0.0	1	Fungi	Ascomycota	unassigned	unassigned	-	-	-	Unassigned	-
New.ReferenceOTU124	3.0	1	Fungi	Ascomycota	unassigned	unassigned	-	-	-	Unassigned	-
New.CleanUp.ReferenceOTU16564	1.0	1	Fungi	Ascomycota	unassigned	unassigned	-	-	-	Unassigned	-
New.CleanUp.ReferenceOTU15435	10.0	1	Fungi	unidentified	unassigned	unassigned	-	-	-	Unassigned	-
New.CleanUp.ReferenceOTU9937	0.0	10	Fungi	Blastocladiomycota	unassigned	unassigned	-	-	-	Unassigned	-
New.CleanUp.ReferenceOTU1368	0.0	102	Fungi	unidentified	unassigned	unassigned	-	-	-	Unassigned	-
New.CleanUp.ReferenceOTU14584	0.0	103	Fungi	unidentified	unassigned	unassigned	-	-	-	Unassigned	-
New.CleanUp.ReferenceOTU14114	0.0	107	Fungi	unidentified	unassigned	unassigned	-	-	-	Unassigned	-
New.ReferenceOTU234	0.0	108	Fungi	Ascomycota	unassigned	unassigned	-	-	-	Unassigned	-
New.CleanUp.ReferenceOTU9958	0.0	11	Fungi	Basidiomycota	unassigned	unassigned	-	-	-	Unassigned	-
New.CleanUp.ReferenceOTU12656	0.0	11	Fungi	unidentified	unassigned	unassigned	-	-	-	Unassigned	-
New.CleanUp.ReferenceOTU16464	0.0	11	Fungi	unidentified	unassigned	unassigned	-	-	-	Unassigned	-
New.ReferenceOTU134	613.0	1130	Fungi	Basidiomycota	unassigned	unassigned	-	-	-	Unassigned	-
SH220401.07FU_JN159579_reps	0.0	12	Fungi	Basidiomycota	unassigned	unassigned	-	-	-	Unassigned	-
New.CleanUp.ReferenceOTU12690	0.0	12	Fungi	unidentified	unassigned	unassigned	-	-	-	Unassigned	-
New.ReferenceOTU155	6.0	120	Fungi	Ascomycota	unassigned	unassigned	-	-	-	Unassigned	-
New.CleanUp.ReferenceOTU4532	0.0	122	Fungi	unidentified	unassigned	unassigned	-	-	-	Unassigned	-
New.ReferenceOTU95	2.0	123	Fungi	Basidiomycota	unassigned	unassigned	-	-	-	Unassigned	-
New.CleanUp.ReferenceOTU11529	0.0	125	Fungi	unidentified	unassigned	unassigned	-	-	-	Unassigned	-
New.ReferenceOTU73	11.0	126	Fungi	Ascomycota	unassigned	unassigned	-	-	-	Unassigned	-
New.CleanUp.ReferenceOTU17067	0.0	13	Fungi	unidentified	unassigned	unassigned	-	-	-	Unassigned	-
New.CleanUp.ReferenceOTU8203	0.0	13	Fungi	unidentified	unassigned	unassigned	-	-	-	Unassigned	-
New.CleanUp.ReferenceOTU5745	0.0	13	Fungi	unidentified	unassigned	unassigned	-	-	-	Unassigned	-
New.CleanUp.ReferenceOTU2954	0.0	13	Fungi	unidentified	unassigned	unassigned	-	-	-	Unassigned	-
New.CleanUp.ReferenceOTU11171	0.0	13	Fungi	unidentified	unassigned	unassigned	-	-	-	Unassigned	-
New.CleanUp.ReferenceOTU2536	2.0	133	Fungi	unidentified	unassigned	unassigned	-	-	-	Unassigned	-
New.CleanUp.ReferenceOTU13908	0.0	134	Fungi	Rozellomycota	unassigned	unassigned	-	-	-	Unassigned	-
New.CleanUp.ReferenceOTU562	0.0	135	Fungi	unidentified	unassigned	unassigned	-	-	-	Unassigned	-
New.ReferenceOTU236	17.0	137	Fungi	Ascomycota	unassigned	unassigned	-	-	-	Unassigned	-
New.CleanUp.ReferenceOTU7787	0.0	139	Fungi	unidentified	unassigned	unassigned	-	-	-	Unassigned	-
New.CleanUp.ReferenceOTU8868	0.0	14	Fungi	Rozellomycota	unassigned	unassigned	-	-	-	Unassigned	-
New.CleanUp.ReferenceOTU4765	0.0	14	Fungi	unidentified	unassigned	unassigned	-	-	-	Unassigned	-
New.ReferenceOTU43	21.0	141	Fungi	Ascomycota	unassigned	unassigned	-	-	-	Unassigned	-
New.CleanUp.ReferenceOTU12740	2.0	15	Fungi	Ascomycota	unassigned	unassigned	-	-	-	Unassigned	-
New.CleanUp.ReferenceOTU16324	14.0	16	Fungi	Ascomycota	unassigned	unassigned	-	-	-	Unassigned	-
New.CleanUp.ReferenceOTU8985	0.0	16	Fungi	unidentified	unassigned	unassigned	-	-	-	Unassigned	-
New.CleanUp.ReferenceOTU17027	0.0	167	Fungi	Chytridiomycota	unassigned	unassigned	-	-	-	Unassigned	-
New.ReferenceOTU201	1.0	168	Fungi	Ascomycota	unassigned	unassigned	-	-	-	Unassigned	-
New.CleanUp.ReferenceOTU12713	11.0	168	Fungi	Ascomycota	unassigned	unassigned	-	-	-	Unassigned	-
New.CleanUp.ReferenceOTU49	0.0	17	Fungi	Ascomycota	unassigned	unassigned	-	-	-	Unassigned	-
New.CleanUp.ReferenceOTU8575	0.0	17	Fungi	unidentified	unassigned	unassigned	-	-	-	Unassigned	-
New.ReferenceOTU204	0.0	1706	Fungi	Blastocladiomycota	unassigned	unassigned	-	-	-	Unassigned	-
New.CleanUp.ReferenceOTU5179	0.0	18	Fungi	unidentified	unassigned	unassigned	-	-	-	Unassigned	-
New.CleanUp.ReferenceOTU6322	0.0	18	Fungi	unidentified	unassigned	unassigned	-	-	-	Unassigned	-
New.CleanUp.ReferenceOTU9406	0.0	182	Fungi	Basidiomycota	unassigned	unassigned	-	-	-	Unassigned	-
New.ReferenceOTU97	0.0	189	Fungi	Rozellomycota	unassigned	unassigned	-	-	-	Unassigned	-
New.CleanUp.ReferenceOTU12891	0.0	19	Fungi	unidentified	unassigned	unassigned	-	-	-	Unassigned	-
New.CleanUp.ReferenceOTU15180	0.0	195	Fungi	Ascomycota	unassigned	unassigned	-	-	-	Unassigned	-
SH205745.07FU_HM208720_reps	5.0	2	Fungi	Ascomycota	unassigned	unassigned	-	-	-	Unassigned	-
New.CleanUp.ReferenceOTU13164	0.0	2	Fungi	Ascomycota	unassigned	unassigned	-	-	-	Unassigned	-
New.CleanUp.ReferenceOTU13645	0.0	2	Fungi	Ascomycota	unassigned	unassigned	-	-	-	Unassigned	-
New.CleanUp.ReferenceOTU12376	0.0	2	Fungi	unidentified	unassigned	unassigned	-	-	-	Unassigned	-
New.CleanUp.ReferenceOTU9370	0.0	20	Fungi	Ascomycota	unassigned	unassigned	-	-	-	Unassigned	-
New.CleanUp.ReferenceOTU5230	0.0	20	Fungi	unidentified	unassigned	unassigned	-	-	-	Unassigned	-
New.CleanUp.ReferenceOTU6183	0.0	204	Fungi	unidentified	unassigned	unassigned	-	-	-	Unassigned	-
New.ReferenceOTU18	91.0	205	Fungi	unidentified	unassigned	unassigned	-	-	-	Unassigned	-
New.CleanUp.ReferenceOTU16231	0.0	21	Fungi	Basidiomycota	unassigned	unassigned	-	-	-	Unassigned	-
New.CleanUp.ReferenceOTU16772	0.0	21	Fungi	Basidiomycota	unassigned	unassigned	-	-	-	Unassigned	-
New.CleanUp.ReferenceOTU12419	0.0	213	Fungi	Ascomycota	unassigned	unassigned	-	-	-	Unassigned	-
New.CleanUp.ReferenceOTU14713	0.0	24	Fungi	unidentified	unassigned	unassigned	-	-	-	Unassigned	-
New.CleanUp.ReferenceOTU10183	0.0	24	Fungi	unidentified	unassigned	unassigned	-	-	-	Unassigned	-
New.CleanUp.ReferenceOTU6828	0.0	25	Fungi	unidentified	unassigned	unassigned	-	-	-	Unassigned	-
New.CleanUp.ReferenceOTU997	0.0	256	Fungi	unidentified	unassigned	unassigned	-	-	-	Unassigned	-
New.CleanUp.ReferenceOTU14141	0.0	26	Fungi	unidentified	unassigned	unassigned	-	-	-	Unassigned	-
New.CleanUp.ReferenceOTU6614	0.0	26	Fungi	unidentified	unassigned	unassigned	-	-	-	Unassigned	-
New.CleanUp.ReferenceOTU5160	0.0	27	Fungi	Ascomycota	unassigned	unassigned	-	-	-	Unassigned	-
New.CleanUp.ReferenceOTU131	0.0	27	Fungi	unidentified	unassigned	unassigned	-	-	-	Unassigned	-
New.CleanUp.ReferenceOTU6633	0.0	27	Fungi	unidentified	unassigned	unassigned	-	-	-	Unassigned	-
New.CleanUp.ReferenceOTU13449	0.0	28	Fungi	unidentified	unassigned	unassigned	-	-	-	Unassigned	-
New.CleanUp.ReferenceOTU12383	0.0	284	Fungi	unidentified	unassigned	unassigned	-	-	-	Unassigned	-
New.CleanUp.ReferenceOTU2574	0.0	29	Fungi	Blastocladiomycota	unassigned	unassigned	-	-	-	Unassigned	-
New.CleanUp.ReferenceOTU2723	0.0	29	Fungi	unidentified	unassigned	unassigned	-	-	-	Unassigned	-
New.CleanUp.ReferenceOTU407	0.0	29	Fungi	unidentified	unassigned	unassigned	-	-	-	Unassigned	-
New.CleanUp.ReferenceOTU6205	0.0	293	Fungi	unidentified	unassigned	unassigned	-	-	-	Unassigned	-
New.ReferenceOTU13	0.0	3	Fungi	Basidiomycota	unassigned	unassigned	-	-	-	Unassigned	-
New.CleanUp.ReferenceOTU10814	0.0	3	Fungi	Basidiomycota	unassigned	unassigned	-	-	-	Unassigned	-
New.CleanUp.ReferenceOTU3364	0.0	30	Fungi	Basidiomycota	unassigned	unassigned	-	-	-	Unassigned	-
New.CleanUp.ReferenceOTU5181	0.0	30	Fungi	unidentified	unassigned	unassigned	-	-	-	Unassigned	-
New.CleanUp.ReferenceOTU15903	4.0	301	Fungi	unidentified	unassigned	unassigned	-	-	-	Unassigned	-
New.CleanUp.ReferenceOTU11436	0.0	31	Fungi	unidentified	unassigned	unassigned	-	-	-	Unassigned	-
New.CleanUp.ReferenceOTU2479	0.0	313	Fungi	Ascomycota	unassigned	unassigned	-	-	-	Unassigned	-
New.ReferenceOTU24	370.0	318	Fungi	Basidiomycota	unassigned	unassigned	-	-	-	Unassigned	-
New.CleanUp.ReferenceOTU1240	0.0	32	Fungi	unidentified	unassigned	unassigned	-	-	-	Unassigned	-
New.CleanUp.ReferenceOTU4280	0.0	32	Fungi	unidentified	unassigned	unassigned	-	-	-	Unassigned	-
New.CleanUp.ReferenceOTU17458	0.0	32	Fungi	unidentified	unassigned	unassigned	-	-	-	Unassigned	-
New.CleanUp.ReferenceOTU2254	0.0	33	Fungi	Basidiomycota	unassigned	unassigned	-	-	-	Unassigned	-
New.CleanUp.ReferenceOTU17273	0.0	33	Fungi	unidentified	unassigned	unassigned	-	-	-	Unassigned	-
New.ReferenceOTU79	160.0	334	Fungi	Ascomycota	unassigned	unassigned	-	-	-	Unassigned	-
New.CleanUp.ReferenceOTU388	0.0	339	Fungi	Chytridiomycota	unassigned	unassigned	-	-	-	Unassigned	-
New.CleanUp.ReferenceOTU14940	0.0	34	Fungi	Basidiomycota	unassigned	unassigned	-	-	-	Unassigned	-
New.CleanUp.ReferenceOTU11496	0.0	35	Fungi	Basidiomycota	unassigned	unassigned	-	-	-	Unassigned	-
New.CleanUp.ReferenceOTU15898	5.0	358	Fungi	unidentified	unassigned	unassigned	-	-	-	Unassigned	-
New.CleanUp.ReferenceOTU4046	0.0	37	Fungi	Ascomycota	unassigned	unassigned	-	-	-	Unassigned	-
New.ReferenceOTU182	0.0	37	Fungi	unidentified	unassigned	unassigned	-	-	-	Unassigned	-
New.ReferenceOTU122	20.0	395	Fungi	Ascomycota	unassigned	unassigned	-	-	-	Unassigned	-
New.ReferenceOTU56	52.0	4	Fungi	unidentified	unassigned	unassigned	-	-	-	Unassigned	-
New.CleanUp.ReferenceOTU9089	0.0	40	Fungi	Ascomycota	unassigned	unassigned	-	-	-	Unassigned	-
New.CleanUp.ReferenceOTU10723	0.0	40	Fungi	unidentified	unassigned	unassigned	-	-	-	Unassigned	-
New.CleanUp.ReferenceOTU10082	0.0	405	Fungi	Rozellomycota	unassigned	unassigned	-	-	-	Unassigned	-
New.CleanUp.ReferenceOTU11347	0.0	42	Fungi	Rozellomycota	unassigned	unassigned	-	-	-	Unassigned	-
New.ReferenceOTU185	0.0	420	Fungi	unidentified	unassigned	unassigned	-	-	-	Unassigned	-
New.CleanUp.ReferenceOTU15192	0.0	43	Fungi	Basidiomycota	unassigned	unassigned	-	-	-	Unassigned	-
New.CleanUp.ReferenceOTU6824	0.0	44	Fungi	unidentified	unassigned	unassigned	-	-	-	Unassigned	-
New.CleanUp.ReferenceOTU529	0.0	44	Fungi	unidentified	unassigned	unassigned	-	-	-	Unassigned	-
New.CleanUp.ReferenceOTU9688	0.0	448	Fungi	unidentified	unassigned	unassigned	-	-	-	Unassigned	-
New.ReferenceOTU144	0.0	45	Fungi	Blastocladiomycota	unassigned	unassigned	-	-	-	Unassigned	-
New.CleanUp.ReferenceOTU17636	0.0	458	Fungi	Basidiomycota	unassigned	unassigned	-	-	-	Unassigned	-
New.ReferenceOTU140	0.0	46	Fungi	unidentified	unassigned	unassigned	-	-	-	Unassigned	-
New.CleanUp.ReferenceOTU11732	0.0	46	Fungi	unidentified	unassigned	unassigned	-	-	-	Unassigned	-
New.CleanUp.ReferenceOTU5815	0.0	48	Fungi	unidentified	unassigned	unassigned	-	-	-	Unassigned	-
New.CleanUp.ReferenceOTU4705	0.0	49	Fungi	unidentified	unassigned	unassigned	-	-	-	Unassigned	-
New.CleanUp.ReferenceOTU3758	0.0	495	Fungi	unidentified	unassigned	unassigned	-	-	-	Unassigned	-
New.ReferenceOTU178	36.0	499	Fungi	Ascomycota	unassigned	unassigned	-	-	-	Unassigned	-
New.CleanUp.ReferenceOTU4197	0.0	50	Fungi	Basidiomycota	unassigned	unassigned	-	-	-	Unassigned	-
New.CleanUp.ReferenceOTU5263	29.0	50	Fungi	unidentified	unassigned	unassigned	-	-	-	Unassigned	-
New.CleanUp.ReferenceOTU17347	0.0	50	Fungi	unidentified	unassigned	unassigned	-	-	-	Unassigned	-
New.ReferenceOTU214	0.0	522	Fungi	unidentified	unassigned	unassigned	-	-	-	Unassigned	-
New.CleanUp.ReferenceOTU13177	0.0	54	Fungi	unidentified	unassigned	unassigned	-	-	-	Unassigned	-
New.CleanUp.ReferenceOTU9869	67.0	58	Fungi	Ascomycota	unassigned	unassigned	-	-	-	Unassigned	-
New.CleanUp.ReferenceOTU7261	0.0	58	Fungi	unidentified	unassigned	unassigned	-	-	-	Unassigned	-
New.CleanUp.ReferenceOTU14192	0.0	59	Fungi	Ascomycota	unassigned	unassigned	-	-	-	Unassigned	-
New.ReferenceOTU199	4.0	59	Fungi	unidentified	unassigned	unassigned	-	-	-	Unassigned	-
New.CleanUp.ReferenceOTU17129	0.0	61	Fungi	Basidiomycota	unassigned	unassigned	-	-	-	Unassigned	-
New.CleanUp.ReferenceOTU7833	0.0	61	Fungi	Rozellomycota	unassigned	unassigned	-	-	-	Unassigned	-
New.ReferenceOTU196	53.0	62	Fungi	Basidiomycota	unassigned	unassigned	-	-	-	Unassigned	-
New.CleanUp.ReferenceOTU9962	0.0	62	Fungi	unidentified	unassigned	unassigned	-	-	-	Unassigned	-
New.CleanUp.ReferenceOTU10368	0.0	62	Fungi	unidentified	unassigned	unassigned	-	-	-	Unassigned	-
New.CleanUp.ReferenceOTU10968	0.0	64	Fungi	unidentified	unassigned	unassigned	-	-	-	Unassigned	-
New.CleanUp.ReferenceOTU11321	1.0	64	Fungi	unidentified	unassigned	unassigned	-	-	-	Unassigned	-
New.CleanUp.ReferenceOTU17172	0.0	66	Fungi	unidentified	unassigned	unassigned	-	-	-	Unassigned	-
New.CleanUp.ReferenceOTU6051	0.0	67	Fungi	Basidiomycota	unassigned	unassigned	-	-	-	Unassigned	-
New.CleanUp.ReferenceOTU4346	0.0	67	Fungi	unidentified	unassigned	unassigned	-	-	-	Unassigned	-
New.CleanUp.ReferenceOTU6298	0.0	67	Fungi	unidentified	unassigned	unassigned	-	-	-	Unassigned	-
New.CleanUp.ReferenceOTU6621	0.0	67	Fungi	unidentified	unassigned	unassigned	-	-	-	Unassigned	-
New.CleanUp.ReferenceOTU232	2.0	68	Fungi	Ascomycota	unassigned	unassigned	-	-	-	Unassigned	-
New.CleanUp.ReferenceOTU15581	0.0	68	Fungi	unidentified	unassigned	unassigned	-	-	-	Unassigned	-
New.CleanUp.ReferenceOTU16648	0.0	68	Fungi	unidentified	unassigned	unassigned	-	-	-	Unassigned	-
New.CleanUp.ReferenceOTU6515	0.0	69	Fungi	Ascomycota	unassigned	unassigned	-	-	-	Unassigned	-
New.CleanUp.ReferenceOTU10367	0.0	69	Fungi	Rozellomycota	unassigned	unassigned	-	-	-	Unassigned	-
New.CleanUp.ReferenceOTU5107	1.0	7	Fungi	Ascomycota	unassigned	unassigned	-	-	-	Unassigned	-
New.CleanUp.ReferenceOTU15436	0.0	70	Fungi	unidentified	unassigned	unassigned	-	-	-	Unassigned	-
New.CleanUp.ReferenceOTU5659	0.0	71	Fungi	unidentified	unassigned	unassigned	-	-	-	Unassigned	-
New.CleanUp.ReferenceOTU13040	0.0	72	Fungi	Chytridiomycota	unassigned	unassigned	-	-	-	Unassigned	-
New.CleanUp.ReferenceOTU8016	0.0	74	Fungi	unidentified	unassigned	unassigned	-	-	-	Unassigned	-
New.CleanUp.ReferenceOTU4670	1.0	77	Fungi	unidentified	unassigned	unassigned	-	-	-	Unassigned	-
New.CleanUp.ReferenceOTU14075	0.0	78	Fungi	unidentified	unassigned	unassigned	-	-	-	Unassigned	-
New.CleanUp.ReferenceOTU8462	0.0	79	Fungi	unidentified	unassigned	unassigned	-	-	-	Unassigned	-
New.CleanUp.ReferenceOTU11980	0.0	86	Fungi	Rozellomycota	unassigned	unassigned	-	-	-	Unassigned	-
New.CleanUp.ReferenceOTU772	0.0	87	Fungi	Basidiomycota	unassigned	unassigned	-	-	-	Unassigned	-
New.CleanUp.ReferenceOTU2480	0.0	87	Fungi	unidentified	unassigned	unassigned	-	-	-	Unassigned	-
New.CleanUp.ReferenceOTU9455	12.0	88	Fungi	Ascomycota	unassigned	unassigned	-	-	-	Unassigned	-
New.CleanUp.ReferenceOTU6962	0.0	9	Fungi	unidentified	unassigned	unassigned	-	-	-	Unassigned	-
New.CleanUp.ReferenceOTU8317	0.0	91	Fungi	unidentified	unassigned	unassigned	-	-	-	Unassigned	-
New.CleanUp.ReferenceOTU3696	0.0	92	Fungi	unidentified	unassigned	unassigned	-	-	-	Unassigned	-
New.CleanUp.ReferenceOTU12665	0.0	95	Fungi	Basidiomycota	unassigned	unassigned	-	-	-	Unassigned	-
New.CleanUp.ReferenceOTU1611	12.0	96	Fungi	Basidiomycota	unassigned	unassigned	-	-	-	Unassigned	-
New.CleanUp.ReferenceOTU16047	0.0	97	Fungi	Ascomycota	unassigned	unassigned	-	-	-	Unassigned	-
New.CleanUp.ReferenceOTU10366	0.0	97	Fungi	unidentified	unassigned	unassigned	-	-	-	Unassigned	-

## Sheet: otu_table_mc10_tax_assigned (6)
	Cropland		Grassland
Taxonomy	#	%	#	%
Unassigned;Other	15025	0.710704	12069	0.614324
k__Fungi;Other	454	0.0214749	26	0.00132342
k__Fungi;p__Ascomycota	4542	0.214843	4638	0.236079	Ascomycota
k__Fungi;p__Basidiomycota	652	0.0308405	917	0.0466762	Basidiomycota
k__Fungi;p__Glomeromycota	2	9.46029e-05	336	0.0171027	Glomeromycota
k__Fungi;p__Zygomycota	466	0.0220425	1649	0.0839357	Zygomycota
k__Fungi;p__unidentified	0	0	11	0.00055991

## Sheet: otu_table_mc10_tax_assigned_sor
	Cropland		Grassland
Taxonomy	#	%	#	%
Unassigned;Other;Other	15025	0.710704	12069	0.614324
k__Fungi;Other;Other	454	0.0214749	26	0.00132342	Other
k__Fungi;p__Ascomycota;Other	37	0.00175015	6	0.000305406	Other
k__Fungi;p__Ascomycota;c__Dothideomycetes	227	0.0107374	57	0.00290135	Dothideomycetes
k__Fungi;p__Ascomycota;c__Eurotiomycetes	1487	0.0703373	635	0.0323221	Eurotiomycetes
k__Fungi;p__Ascomycota;c__Incertae sedis	12	0.000567617	7	0.000356307	Incertae sedis
k__Fungi;p__Ascomycota;c__Leotiomycetes	540	0.0255428	3117	0.158658	Leotiomycetes
k__Fungi;p__Ascomycota;c__Orbiliomycetes	12	0.000567617	28	0.00142523	Orbiliomycetes
k__Fungi;p__Ascomycota;c__Saccharomycetes	8	0.000378412	0	0	Saccharomycetes
k__Fungi;p__Ascomycota;c__Sordariomycetes	2078	0.0982924	660	0.0335946	Sordariomycetes
k__Fungi;p__Ascomycota;c__unidentified	141	0.0066695	128	0.00651532	unidentified
k__Fungi;p__Basidiomycota;c__Agaricomycetes	11	0.000520316	153	0.00778784	Agaricomycetes
k__Fungi;p__Basidiomycota;c__Incertae sedis	1	4.73015e-05	0	0	Incertae sedis
k__Fungi;p__Basidiomycota;c__Tremellomycetes	640	0.0302729	764	0.0388883	Tremellomycetes
k__Fungi;p__Glomeromycota;c__Glomeromycetes	2	9.46029e-05	336	0.0171027	Glomeromycetes
k__Fungi;p__Zygomycota;c__Incertae sedis	466	0.0220425	1649	0.0839357	Incertae sedis
k__Fungi;p__unidentified;c__unidentified	0	0	11	0.00055991

## Sheet: otu_table_mc10_tax_assigned (3)
	Cropland		Grassland
Taxonomy	#	%	#	%
Unassigned;Other;Other;Other;Other;Other	15025	0.710704	12069	0.614324
k__Fungi;Other;Other;Other;Other;Other	454	0.0214749	26	0.00132342	Other
k__Fungi;p__Ascomycota;Other;Other;Other;Other	37	0.00175015	6	0.000305406	Other
k__Fungi;p__Ascomycota;c__Dothideomycetes;o__Capnodiales;Other;Other	7	0.00033111	2	0.000101802	Other
k__Fungi;p__Ascomycota;c__Dothideomycetes;o__Capnodiales;f__Davidiellaceae;g__Cladosporium	22	0.00104063	3	0.000152703	Cladosporium
k__Fungi;p__Ascomycota;c__Dothideomycetes;o__Capnodiales;f__Mycosphaerellaceae;g__Septoria	0	0	1	5.09009e-05	Septoria
k__Fungi;p__Ascomycota;c__Dothideomycetes;o__Incertae sedis;f__Myxotrichaceae;g__Gymnostellatospora	104	0.00491935	20	0.00101802	Gymnostellatospora
k__Fungi;p__Ascomycota;c__Dothideomycetes;o__Incertae sedis;f__Myxotrichaceae;g__Oidiodendron	1	4.73015e-05	7	0.000356307	Oidiodendron
k__Fungi;p__Ascomycota;c__Dothideomycetes;o__Incertae sedis;f__Pseudeurotiaceae;g__Pseudogymnoascus	41	0.00193936	1	5.09009e-05	Pseudogymnoascus
k__Fungi;p__Ascomycota;c__Dothideomycetes;o__Pleosporales;Other;Other	1	4.73015e-05	0	0	Other
k__Fungi;p__Ascomycota;c__Dothideomycetes;o__Pleosporales;f__Cucurbitariaceae;g__Pyrenochaetopsis	8	0.000378412	10	0.000509009	Pyrenochaetopsis
k__Fungi;p__Ascomycota;c__Dothideomycetes;o__Pleosporales;f__Incertae sedis;Other	3	0.000141904	0	0	Other
k__Fungi;p__Ascomycota;c__Dothideomycetes;o__Pleosporales;f__Incertae sedis;g__Didymella	5	0.000236507	0	0	Didymella
k__Fungi;p__Ascomycota;c__Dothideomycetes;o__Pleosporales;f__Incertae sedis;g__Phoma	9	0.000425713	0	0	Phoma
k__Fungi;p__Ascomycota;c__Dothideomycetes;o__Pleosporales;f__Incertae sedis;g__Stagonosporopsis	0	0	3	0.000152703	Stagonosporopsis
k__Fungi;p__Ascomycota;c__Dothideomycetes;o__Pleosporales;f__Montagnulaceae;g__Paraconiothyrium	9	0.000425713	0	0	Paraconiothyrium
k__Fungi;p__Ascomycota;c__Dothideomycetes;o__Pleosporales;f__Pleosporaceae;g__Alternaria	3	0.000141904	0	0	Alternaria
k__Fungi;p__Ascomycota;c__Dothideomycetes;o__Pleosporales;f__Pleosporaceae;g__unidentified	2	9.46029e-05	0	0	unidentified
k__Fungi;p__Ascomycota;c__Dothideomycetes;o__Pleosporales;f__Sporormiaceae;Other	11	0.000520316	0	0	Other
k__Fungi;p__Ascomycota;c__Dothideomycetes;o__Pleosporales;f__Sporormiaceae;g__Westerdykella	0	0	10	0.000509009	Westerdykella
k__Fungi;p__Ascomycota;c__Dothideomycetes;o__Pleosporales;f__unidentified;g__unidentified	1	4.73015e-05	0	0	unidentified
k__Fungi;p__Ascomycota;c__Eurotiomycetes;o__Chaetothyriales;Other;Other	0	0	4	0.000203604	Other
k__Fungi;p__Ascomycota;c__Eurotiomycetes;o__Chaetothyriales;f__Chaetothyriaceae;g__Cyphellophora	2	9.46029e-05	1	5.09009e-05	Cyphellophora
k__Fungi;p__Ascomycota;c__Eurotiomycetes;o__Chaetothyriales;f__Herpotrichiellaceae;Other	140	0.0066222	20	0.00101802	Other
k__Fungi;p__Ascomycota;c__Eurotiomycetes;o__Chaetothyriales;f__Herpotrichiellaceae;g__Capronia	0	0	2	0.000101802	Capronia
k__Fungi;p__Ascomycota;c__Eurotiomycetes;o__Chaetothyriales;f__Herpotrichiellaceae;g__Cladophialophora	18	0.000851426	1	5.09009e-05	Cladophialophora
k__Fungi;p__Ascomycota;c__Eurotiomycetes;o__Chaetothyriales;f__Herpotrichiellaceae;g__Exophiala	103	0.00487205	131	0.00666802	Exophiala
k__Fungi;p__Ascomycota;c__Eurotiomycetes;o__Chaetothyriales;f__Herpotrichiellaceae;g__Phialophora	0	0	0	0	Phialophora
k__Fungi;p__Ascomycota;c__Eurotiomycetes;o__Eurotiales;Other;Other	13	0.000614919	0	0	Other
k__Fungi;p__Ascomycota;c__Eurotiomycetes;o__Eurotiales;f__Trichocomaceae;g__Aspergillus	3	0.000141904	0	0	Aspergillus
k__Fungi;p__Ascomycota;c__Eurotiomycetes;o__Eurotiales;f__Trichocomaceae;g__Paecilomyces	1	4.73015e-05	1	5.09009e-05	Paecilomyces
k__Fungi;p__Ascomycota;c__Eurotiomycetes;o__Eurotiales;f__Trichocomaceae;g__Penicillium	1175	0.0555792	433	0.0220401	Penicillium
k__Fungi;p__Ascomycota;c__Eurotiomycetes;o__Eurotiales;f__Trichocomaceae;g__Talaromyces	32	0.00151365	42	0.00213784	Talaromyces
k__Fungi;p__Ascomycota;c__Incertae sedis;o__Incertae sedis;f__Incertae sedis;g__Camposporium	1	4.73015e-05	0	0	Camposporium
k__Fungi;p__Ascomycota;c__Incertae sedis;o__Incertae sedis;f__Incertae sedis;g__Leptodiscella	1	4.73015e-05	6	0.000305406	Leptodiscella
k__Fungi;p__Ascomycota;c__Incertae sedis;o__Incertae sedis;f__Incertae sedis;g__Ochroconis	10	0.000473015	1	5.09009e-05	Ochroconis
k__Fungi;p__Ascomycota;c__Leotiomycetes;o__Helotiales;Other;Other	7	0.00033111	0	0	Other
k__Fungi;p__Ascomycota;c__Leotiomycetes;o__Helotiales;f__Helotiaceae;g__Tricladium	25	0.00118254	1	5.09009e-05	Tricladium
k__Fungi;p__Ascomycota;c__Leotiomycetes;o__Helotiales;f__Helotiaceae;g__unidentified	0	0	0	0	unidentified
k__Fungi;p__Ascomycota;c__Leotiomycetes;o__Helotiales;f__Hyaloscyphaceae;g__Lachnum	1	4.73015e-05	93	0.00473379	Lachnum
k__Fungi;p__Ascomycota;c__Leotiomycetes;o__Helotiales;f__Incertae sedis;g__Spirosphaera	25	0.00118254	0	0	Spirosphaera
k__Fungi;p__Ascomycota;c__Leotiomycetes;o__Helotiales;f__Incertae sedis;g__Xylogone	1	4.73015e-05	0	0	Xylogone
k__Fungi;p__Ascomycota;c__Leotiomycetes;o__Helotiales;f__unidentified;g__unidentified	190	0.00898728	2481	0.126285	unidentified
k__Fungi;p__Ascomycota;c__Leotiomycetes;o__Incertae sedis;f__Incertae sedis;g__Geomyces	229	0.010832	254	0.0129288	Geomyces
k__Fungi;p__Ascomycota;c__Leotiomycetes;o__unidentified;f__unidentified;g__unidentified	62	0.00293269	288	0.0146595	unidentified
k__Fungi;p__Ascomycota;c__Orbiliomycetes;o__Orbiliales;f__Orbiliaceae;Other	12	0.000567617	28	0.00142523	Other
k__Fungi;p__Ascomycota;c__Saccharomycetes;o__Saccharomycetales;f__Incertae sedis;g__Nadsonia	3	0.000141904	0	0	Nadsonia
k__Fungi;p__Ascomycota;c__Saccharomycetes;o__Saccharomycetales;f__Saccharomycetaceae;g__Williopsis	5	0.000236507	0	0	Williopsis
k__Fungi;p__Ascomycota;c__Sordariomycetes;Other;Other;Other	302	0.014285	3	0.000152703	Other
k__Fungi;p__Ascomycota;c__Sordariomycetes;o__Chaetosphaeriales;f__Chaetosphaeriaceae;Other	34	0.00160825	0	0	Other
k__Fungi;p__Ascomycota;c__Sordariomycetes;o__Chaetosphaeriales;f__Chaetosphaeriaceae;g__Codinaeopsis	5	0.000236507	0	0	Codinaeopsis
k__Fungi;p__Ascomycota;c__Sordariomycetes;o__Coniochaetales;f__Coniochaetaceae;g__Lecythophora	1	4.73015e-05	1	5.09009e-05	Lecythophora
k__Fungi;p__Ascomycota;c__Sordariomycetes;o__Hypocreales;Other;Other	82	0.00387872	3	0.000152703	Other
k__Fungi;p__Ascomycota;c__Sordariomycetes;o__Hypocreales;f__Bionectriaceae;g__Bionectria	3	0.000141904	1	5.09009e-05	Bionectria
k__Fungi;p__Ascomycota;c__Sordariomycetes;o__Hypocreales;f__Clavicipitaceae;g__Metarhizium	565	0.0267253	0	0	Metarhizium
k__Fungi;p__Ascomycota;c__Sordariomycetes;o__Hypocreales;f__Cordycipitaceae;Other	0	0	9	0.000458109	Other
k__Fungi;p__Ascomycota;c__Sordariomycetes;o__Hypocreales;f__Hypocreaceae;Other	5	0.000236507	0	0	Other
k__Fungi;p__Ascomycota;c__Sordariomycetes;o__Hypocreales;f__Hypocreaceae;g__Hypocrea	8	0.000378412	0	0	Hypocrea
k__Fungi;p__Ascomycota;c__Sordariomycetes;o__Hypocreales;f__Hypocreaceae;g__Trichoderma	86	0.00406792	467	0.0237707	Trichoderma
k__Fungi;p__Ascomycota;c__Sordariomycetes;o__Hypocreales;f__Nectriaceae;Other	14	0.00066222	0	0	Other
k__Fungi;p__Ascomycota;c__Sordariomycetes;o__Hypocreales;f__Nectriaceae;g__Fusarium	673	0.0318339	140	0.00712613	Fusarium
k__Fungi;p__Ascomycota;c__Sordariomycetes;o__Hypocreales;f__Nectriaceae;g__unidentified	1	4.73015e-05	0	0	unidentified
k__Fungi;p__Ascomycota;c__Sordariomycetes;o__Hypocreales;f__Ophiocordycipitaceae;g__Hirsutella	18	0.000851426	14	0.000712613	Hirsutella
k__Fungi;p__Ascomycota;c__Sordariomycetes;o__Hypocreales;f__unidentified;g__unidentified	11	0.000520316	11	0.00055991	unidentified
k__Fungi;p__Ascomycota;c__Sordariomycetes;o__Incertae sedis;f__Annulatascaceae;g__Conlarium	3	0.000141904	0	0	Conlarium
k__Fungi;p__Ascomycota;c__Sordariomycetes;o__Incertae sedis;f__Glomerellaceae;g__Colletotrichum	2	9.46029e-05	0	0	Colletotrichum
k__Fungi;p__Ascomycota;c__Sordariomycetes;o__Incertae sedis;f__Incertae sedis;g__Myrmecridium	1	4.73015e-05	0	0	Myrmecridium
k__Fungi;p__Ascomycota;c__Sordariomycetes;o__Incertae sedis;f__Plectosphaerellaceae;g__Gibellulopsis	37	0.00175015	0	0	Gibellulopsis
k__Fungi;p__Ascomycota;c__Sordariomycetes;o__Melanosporales;f__Ceratostomataceae;g__Sphaerodes	0	0	1	5.09009e-05	Sphaerodes
k__Fungi;p__Ascomycota;c__Sordariomycetes;o__Microascales;f__Microascaceae;g__Scedosporium	1	4.73015e-05	0	0	Scedosporium
k__Fungi;p__Ascomycota;c__Sordariomycetes;o__Microascales;f__Microascaceae;g__unidentified	1	4.73015e-05	4	0.000203604	unidentified
k__Fungi;p__Ascomycota;c__Sordariomycetes;o__Ophiostomatales;f__Ophiostomataceae;g__Sporothrix	8	0.000378412	1	5.09009e-05	Sporothrix
k__Fungi;p__Ascomycota;c__Sordariomycetes;o__Sordariales;f__Chaetomiaceae;g__Chaetomium	2	9.46029e-05	0	0	Chaetomium
k__Fungi;p__Ascomycota;c__Sordariomycetes;o__Sordariales;f__Lasiosphaeriaceae;g__Cladorrhinum	28	0.00132444	0	0	Cladorrhinum
k__Fungi;p__Ascomycota;c__Sordariomycetes;o__Sordariales;f__Lasiosphaeriaceae;g__unidentified	172	0.00813585	1	5.09009e-05	unidentified
k__Fungi;p__Ascomycota;c__Sordariomycetes;o__Sordariales;f__Sordariaceae;g__Neurospora	0	0	4	0.000203604	Neurospora
k__Fungi;p__Ascomycota;c__Sordariomycetes;o__Sordariales;f__unidentified;g__unidentified	8	0.000378412	0	0	unidentified
k__Fungi;p__Ascomycota;c__Sordariomycetes;o__unidentified;f__unidentified;g__unidentified	7	0.00033111	0	0	unidentified
k__Fungi;p__Ascomycota;c__unidentified;o__unidentified;f__unidentified;g__unidentified	141	0.0066695	128	0.00651532	unidentified
k__Fungi;p__Basidiomycota;c__Agaricomycetes;o__Agaricales;f__Entolomataceae;g__Entoloma	0	0	10	0.000509009	Entoloma
k__Fungi;p__Basidiomycota;c__Agaricomycetes;o__Agaricales;f__Hygrophoraceae;g__Hygrocybe	1	4.73015e-05	0	0	Hygrocybe
k__Fungi;p__Basidiomycota;c__Agaricomycetes;o__Agaricales;f__unidentified;g__unidentified	1	4.73015e-05	0	0	unidentified
k__Fungi;p__Basidiomycota;c__Agaricomycetes;o__Cantharellales;f__Ceratobasidiaceae;Other	0	0	51	0.00259595	Other
k__Fungi;p__Basidiomycota;c__Agaricomycetes;o__Cantharellales;f__Ceratobasidiaceae;g__unidentified	0	0	32	0.00162883	unidentified
k__Fungi;p__Basidiomycota;c__Agaricomycetes;o__Polyporales;f__Ganodermataceae;g__Ganoderma	3	0.000141904	0	0	Ganoderma
k__Fungi;p__Basidiomycota;c__Agaricomycetes;o__Sebacinales;f__Sebacinales Group B;g__unidentified	0	0	33	0.00167973	unidentified
k__Fungi;p__Basidiomycota;c__Agaricomycetes;o__Trechisporales;f__Hydnodontaceae;g__Trechispora	0	0	27	0.00137433	Trechispora
k__Fungi;p__Basidiomycota;c__Agaricomycetes;o__Trechisporales;f__unidentified;g__unidentified	6	0.000283809	0	0	unidentified
k__Fungi;p__Basidiomycota;c__Incertae sedis;o__Malasseziales;f__Incertae sedis;g__Malassezia	1	4.73015e-05	0	0	Malassezia
k__Fungi;p__Basidiomycota;c__Tremellomycetes;o__Tremellales;f__unidentified;g__unidentified	640	0.0302729	764	0.0388883	unidentified
k__Fungi;p__Glomeromycota;c__Glomeromycetes;o__Archaeosporales;f__unidentified;g__unidentified	2	9.46029e-05	336	0.0171027	unidentified
k__Fungi;p__Zygomycota;c__Incertae sedis;o__Mortierellales;f__Mortierellaceae;g__Mortierella	464	0.0219479	1633	0.0831212	Mortierella
k__Fungi;p__Zygomycota;c__Incertae sedis;o__Mucorales;f__Mucoraceae;g__Mucor	2	9.46029e-05	16	0.000814415	Mucor
k__Fungi;p__unidentified;c__unidentified;o__unidentified;f__unidentified;g__unidentified	0	0	11	0.00055991	unidentified
